# Supplementary material for: Association between cardiovascular risk factors and coronary artery disease assessed using CAD-RADS classification: a cross-sectional study in Romanian population
Source: PubMed Central journal article supplement — BMJ Open. 2020 Jan 7;10(1):e031799. doi: 10.1136/bmjopen-2019-031799 (PMC6955553; doi:10.1136/bmjopen-2019-031799), 2020-01-07
Supplement: bmjopen-2019-031799.draft_revisions.pdf [file bmjopen-2019-031799.draft_revisions.pdf]

# BMJ Open

BMJ Open is committed to open peer review. As part of this commitment we make the peer review history of every article we publish publicly available.

When an article is published we post the peer reviewers' comments and the authors' responses online. We also post the versions of the paper that were used during peer review. These are the versions that the peer review comments apply to.

The versions of the paper that follow are the versions that were submitted during the peer review process. They are not the versions of record or the final published versions. They should not be cited or distributed as the published version of this manuscript.

BMJ Open is an open access journal and the full, final, typeset and author-corrected version of record of the manuscript is available on our site with no access controls, subscription charges or pay-per-view fees (<http://bmjopen.bmj.com>).

If you have any questions on BMJ Open's open peer review process please email [info.bmjopen@bmj.com](mailto:info.bmjopen@bmj.com)

# BMJ Open

## Cardiovascular risk factors as predictors of coronary artery disease assessed using CAD-RADS classification: a cross-sectional study in Romanian population

|                               |                                                                                                                                                                                                                                                                                                                                                                                                                                                                                                                                                                                                                                                                                                                                                                                                                                                                                                                                                                                                                                                                                                              |
|-------------------------------|--------------------------------------------------------------------------------------------------------------------------------------------------------------------------------------------------------------------------------------------------------------------------------------------------------------------------------------------------------------------------------------------------------------------------------------------------------------------------------------------------------------------------------------------------------------------------------------------------------------------------------------------------------------------------------------------------------------------------------------------------------------------------------------------------------------------------------------------------------------------------------------------------------------------------------------------------------------------------------------------------------------------------------------------------------------------------------------------------------------|
| Journal:                      | <i>BMJ Open</i>                                                                                                                                                                                                                                                                                                                                                                                                                                                                                                                                                                                                                                                                                                                                                                                                                                                                                                                                                                                                                                                                                              |
| Manuscript ID                 | bmjopen-2019-031799                                                                                                                                                                                                                                                                                                                                                                                                                                                                                                                                                                                                                                                                                                                                                                                                                                                                                                                                                                                                                                                                                          |
| Article Type:                 | Research                                                                                                                                                                                                                                                                                                                                                                                                                                                                                                                                                                                                                                                                                                                                                                                                                                                                                                                                                                                                                                                                                                     |
| Date Submitted by the Author: | 19-May-2019                                                                                                                                                                                                                                                                                                                                                                                                                                                                                                                                                                                                                                                                                                                                                                                                                                                                                                                                                                                                                                                                                                  |
| Complete List of Authors:     | <p>Popa, Loredana; University of Medicine and Pharmacy Targu Mures, Radiology; Hiperdia-Affidea Imaging Center</p> <p>Petresc, Bianca; Cluj-Napoca County Emergency Hospital, Radiology</p> <p>Cătană, Cristina; Cluj-Napoca County Emergency Hospital, Radiology</p> <p>Moldovanu, Claudia; Cluj-Napoca County Emergency Hospital, Radiology</p> <p>Feier, Diana; Iuliu Hațieganu University of Medicine and Pharmacy; Hiperdia-Affidea Imaging Center, Radiology</p> <p>Lebovici, Andrei; Iuliu Hațieganu University of Medicine and Pharmacy, Radiology; Hiperdia-Affidea Imaging Center, Radiology</p> <p>Schiau, Călin; Iuliu Hațieganu University of Medicine and Pharmacy, Radiology</p> <p>Rancea, Raluca; Heart Institute Nicolae Stancioiu Cluj-Napoca, Cardiology</p> <p>Molnar, Adrian; Heart Institute Nicolae Stancioiu Cluj-Napoca, Cardiovascular Surgery; Iuliu Hațieganu University of Medicine and Pharmacy, Cardiovascular and Thoracic Surgery</p> <p>Buruian, Mircea; University of Medicine and Pharmacy Targu Mures, Radiology; Emergency County Hospital Targu-Mures, Radiology</p> |
| Keywords:                     | coronary artery disease, coronary CT angiography, CAD-RADS, cardiovascular risk factors                                                                                                                                                                                                                                                                                                                                                                                                                                                                                                                                                                                                                                                                                                                                                                                                                                                                                                                                                                                                                      |
|                               |                                                                                                                                                                                                                                                                                                                                                                                                                                                                                                                                                                                                                                                                                                                                                                                                                                                                                                                                                                                                                                                                                                              |

SCHOLARONE™  
Manuscripts

# Cardiovascular risk factors as predictors of coronary artery disease assessed using CAD-RADS classification: a cross-sectional study in Romanian population

## Authors:

Loredana Elisabeta Popa<sup>1,2</sup>, Bianca Petresc<sup>3</sup>, Cristina Cătană<sup>3</sup>, Claudia Gabriela Moldovanu<sup>3</sup>, Diana-Sorina Feier<sup>2,3,4</sup>, Andrei Lebovici<sup>2,3,4</sup>, Călin Schiau<sup>4</sup>, Raluca Alina Rancea<sup>5</sup>, Adrian Molnar<sup>6,7</sup>, Mircea Marian Buruian<sup>1,8</sup>

## Affiliations:

1. Department of Radiology, University of Medicine and Pharmacy Targu Mures  
Address: Gh. Marinescu Street, nr. 50, 540136, Targu Mures, Romania
2. Department of Radiology, Hiperdia-Affidea Imaging Center Cluj-Napoca  
Address: Republicii Street, nr. 105A, 400000, Cluj-Napoca, Romania
3. Department of Radiology, County Emergency Hospital Cluj-Napoca  
Address: Clinicilor Street, nr. 1-3, 400006, Cluj-Napoca, Romania
4. Department of Radiology, “Iuliu Hațieganu” University of Medicine and Pharmacy, Cluj-Napoca, Romania  
Address: Clinicilor Street, nr. 1-3, 400006, Cluj-Napoca, Romania
5. Department of Cardiology, Heart Institute “Nicolae Stancioiu” Cluj-Napoca  
Address: Motilor Street, nr. 19-21, 400001 Cluj-Napoca, Romania
6. Department of Cardiovascular Surgery, Heart Institute “Nicolae Stancioiu” Cluj-Napoca Romania  
Address: Motilor Street, nr. 19-21, 400001 Cluj-Napoca, Romania
7. Department of Cardiovascular and Thoracic Surgery Surgery, “Iuliu Hațieganu” University of Medicine and Pharmacy, Cluj-Napoca, Romania  
Address: Motilor Street, nr. 19-21, 400001 Cluj-Napoca, Romania
8. Department of Radiology, Emergency County Hospital Targu Mures  
Address: Gh. Marinescu Street, nr. 50, 540136, Targu Mures, Romania

## Corresponding Author:

Bianca Petresc

Email: bianca.petresc@gmail.com

Phone: +40734714327

Address: Department of Radiology, County Emergency Hospital Cluj-Napoca, Clinicilor Street, nr. 1-3, 400006, Cluj-Napoca, Romania

ORCID: 0000-0003-2167-9350

## Abstract

**Objectives:** The aim of this study was to evaluate the association between cardiovascular risk factors and CAD-RADS score. CAD-RADS is a new, standardized method to assess coronary artery disease (CAD) using coronary computed tomography angiography (CCTA).

**Design:** A cross-sectional observational, patient-based cohort study.

**Setting:** Referred imaging centre for coronary artery disease in Transylvania, Romania.

**Participants:** We retrospectively reviewed 674 patients who underwent CCTA between January 2017 and August 2018. The exclusion criteria included: previously known CAD, defined as prior myocardial infarction, percutaneous coronary intervention or coronary artery bypass graft surgery (n=91), cardiac CT for other than evaluation of possible CAD (n=85), significant arrhythmias compromising imaging quality (n=23). Finally, 475 patients fulfilled the inclusion criteria.

**Methods:** Demographical, clinical and CCTA characteristics of the patients were obtained. Coronary artery disease was evaluated using CAD-RADS score. Obstructive CAD was defined as  $\geq 50\%$  stenosis of  $\geq 1$  coronary segment on CCTA.

**Results:** We evaluated the association between risk factors and CAD-RADS score in univariate and multivariate analysis. On univariate analysis, male gender, age, hypertension, dyslipidemia, smoking, diabetes mellitus, typical angina and coronary artery calcium score (CACs) were positively associated with a higher CAD-RADS score. For the multivariate analysis, we divided the patients into 2 groups according to the CAD-RADS system: group 1: CAD-RADS score between 0-2 (stenosis  $< 50\%$ ) and group 2: CAD-RADS score  $\geq 3$  (stenosis  $\geq 50\%$ ). Male sex, age  $> 60$  years, dyslipidemia, hypertension and typical angina remained major predictors of obstructive CAD. We developed 2 prediction models for CAD-RADS score  $\geq 3$ : a clinical model and one including also CACS. The clinical model had a good discriminative power (AUC=0.83,  $p < 0.0001$ ). After adding CACS, the prediction performance has been improved (AUC= 0.93,  $p < 0.0001$ ).

**Conclusion:** This study demonstrated that there is a significant association between multiple cardiovascular risk factors and a higher coronary atherosclerotic burden assessed using CAD-RADS system.

**Keywords:** coronary artery disease; coronary CT angiography; CAD-RADS; cardiovascular risk factors

## Article Summary

### Strengths and limitations of this study

- This is the first study to evaluate the association of cardiovascular risk factors and coronary artery disease assessed using coronary CT angiography in Romania.
- We quantified the coronary artery stenosis using the CAD-RADS classification, the newest, standardized method for reporting CAD.
- The patients were recruited from a single centre; therefore, the study population was relatively small.
- Another limitation is the design of the study: a cross-sectional, retrospective one.

### Introduction

Coronary artery disease (CAD) is one of the major causes of morbidity and mortality worldwide. Despite the fact that CAD mortality rates have declined since 1980s, it still accounts for approximately one-third of all deaths of individuals aged over 35 years old(1,2).

It is well-known that atherosclerosis is the underlying cause of cardiovascular diseases and multiple risk factors augment the atherosclerotic process. These risk factors include non-modifiable ones such as age and sex and modifiable risk factors such as hypertension, dyslipidemia, obesity, diabetes mellitus and smoking (3-7). Studies suggest that the majority of patients with CAD have at least one modifiable risk factor and their presence has an impactful role in the progression of CAD (8,9).

Prognostic assessment is very important in the management of the patients with CAD. Therefore, many risk-scoring systems have been developed such as Framingham and SCORE, which are based on the presence of various traditional cardiovascular risk factors (10,11).

Moreover, with the recent advancements made in medical technology, coronary CT angiography (CCTA) has rapidly evolved into one of the most highly accurate methods for diagnosis and evaluation of CAD. It is an unique non-invasive test which can provide direct and accurate visualization of the coronary vessel lumen, being able to quantify the presence and extent of coronary stenosis and to assess the characteristics of coronary atherosclerotic plaques (12).

CCTA has been included in the latest ESC guideline on the management of stable artery disease, being categorized as class II LOE C recommendation. CCTA should be used for risk stratification in patients with stable CAD who are in the lower range of intermediate pre-test probability. Also, it can be considered for patients who are unable to exercise or to perform a stress test or for subjects with inconclusive functional test results (13).

In recent years, many studies have been conducted to evaluate the short and long-term prognostic importance of CCTA. They demonstrate the fact that measurements of both stenosis severity and

1  
2  
3 plaque features provide powerful prognostic information superior to traditional cardiovascular  
4 risk factors (14-18).  
5

6  
7 In 2016, the Society of Cardiovascular Computed Tomography published the CAD-RADS  
8 grading system, which is a standardized reporting method of CCTA results. This is meant to  
9 facilitate communication of the results along with suggestions for consecutive management of the  
10 patients. The grading system ranges from 0 to 5, where CAD-RADS 0 score means complete  
11 absence of stenosis and CAD-RADS 5 represents total occlusion of at least 1 coronary segment  
12 (19).  
13  
14

15 The aim of this study is to evaluate the association between traditional cardiovascular risk factors  
16 and coronary artery disease evaluated using the CAD-RADS score.  
17

## 18 **Methods**

### 19 *Study population*

20  
21 We retrospectively reviewed 674 consecutive patients who underwent CCTA between January  
22 2017 and August 2018 in our institution. The indications for CCTA were: atypical angina, typical  
23 angina with an inconclusive stress test, patients with intermediate/high-risk for major cardiac  
24 events. The exclusion criteria included: previously known CAD, defined as prior myocardial  
25 infarction, percutaneous coronary intervention or coronary artery bypass graft surgery (n=91),  
26 cardiac CT for other than evaluation of possible CAD (n=85), significant arrhythmias  
27 compromising imaging quality (n=23). Beside these exclusion criteria, patients with renal failure,  
28 documented contrast allergy or pregnant women did not perform the CT examination. Finally,  
29 475 subjects fulfilled the inclusion criteria.  
30  
31  
32  
33  
34  
35

### 36 *Scan protocol*

37  
38 All CCTA scans were performed with a 64-sliced multi-detector CT (Sensation 64, Siemens,  
39 Forchheim, Germany). The scanning parameters were: slices/collimation 64/0.6 mm, tube voltage  
40 120 kv, 850 mAs, gantry rotation time 330 ms, pitch 0.2, effective slice thickness 0.75 mm and  
41 reconstruction increment 0.4 mm. Patients with a heart-rate > 70 bpm received premedication  
42 with oral beta-blockers 1 hour prior the examination. Short-acting nitroglycerine sublingual spray  
43 was administered to all patients for coronary vasodilatation.  
44  
45  
46

47 First, a non-contrast enhanced scan was performed in order to assess the coronary artery calcium  
48 score (CACS). This scan was followed by the coronary computed tomography angiography  
49 (CCTA) to evaluate the coronary artery lumen and to characterize the atherosclerotic plaques. A  
50 bolus of 80 ml of iodinated contrast medium was administered intravenously at 5 ml/sec,  
51 followed by 40 ml of saline injected at the same rate. After the acquisition, the images were  
52 transferred to a dedicated workstation for post-processing, which included multiplanar  
53  
54  
55  
56  
57

1  
2  
3 reconstructions (MPR), maximum intensity projections (MIP) and volume rendering images  
4 (VRT).  
5

### 6 ***Coronary artery analysis***

7  
8 All CCTA images were assessed by an experienced radiologist who was blinded to the study  
9 (LE.P.). CACS was calculated using a semi-automatically software, according to the Agatston  
10 method. Plaque composition was classified as: calcified, non-calcified or mixed, with coronary  
11 calcified plaque being defined as any structure with a density  $\geq 130$  HU.  
12  
13

14  
15 Coronary atherosclerotic lesions were quantified for stenosis by visual estimation. We evaluated  
16 only the coronary segments with a diameter greater than 1.5 mm.  
17

18  
19 Every patient received a final CAD-RADS score based on the extent of coronary stenosis  
20 (Figure 1). CAD-RADS score of 0 was assigned if there was total absence of coronary plaques or  
21 stenosis. Minimal coronary stenosis between 1-24% was considered CAD-RADS 1. CAD-RADS  
22 score 2 was given when there was a mild stenosis between 25-49%. CAD-RADS score of 3  
23 corresponded to a moderate stenosis between 50-69%. CAD-RADS score of 4 was assigned if  
24 there was a single coronary stenosis between 70-99% or if the left main artery was depicted with  
25 a stenosis of more than 50%. Also, CAD-RADS score of 4 was given in the situation of 3-vessel  
26 obstructive disease, when there were stenosis of more than 70% involving all the three coronary  
27 arteries (left anterior descending artery, circumflex artery and right coronary artery). If total  
28 occlusion was identified in at least one coronary segment, a CAD-RADS score of 5 was assigned.  
29  
30  
31

32 Obstructive CAD was defined as  $\geq 50\%$  stenosis of  $\geq 1$  coronary segments on CCTA.  
33

### 34 ***Cardiovascular risk factors***

35  
36 Prior to CCTA, a detailed medical history with the risk factors was obtained from all patients.  
37 Hypertension was defined as blood pressure  $\geq 140/90$  mm Hg or treatment with antihypertensive  
38 medications. Dyslipidemia was defined as a total cholesterol level  $\geq 220$  mg/dl or treatment with  
39 lipid-lowering medications. Diabetes mellitus was defined as fasting plasma glucose  $\geq 126$  mg/dl  
40 or the use of insulin or oral antidiabetic agents. Obesity was defined as body mass index (BMI)  $\geq$   
41  $30$  kg/m<sup>2</sup>. Self-reported smoking status was obtained by a query regarding both current and  
42 previous smoking history. Classification of symptoms (typical angina, atypical angina, non-  
43 anginal pain) was judged by cardiologists in patient interviews conducted prior to the CT  
44 examination.  
45  
46  
47  
48

### 49 ***Statistical analysis***

50  
51 Categorical variables were presented as numbers and percentages. Continuous variables with  
52 normal distribution were expressed as means  $\pm$  standard deviation, those with non-normal  
53 distribution as median with interquartile range. Normality was tested with the Kolmogorov-  
54 Smirnov test.  
55  
56  
57

Differences between CAD-RADS groups were evaluated using one-way analysis of variance (ANOVA) for continuous variables and  $\chi^2$  test for categorical variables. Whenever the distribution of continuous data was not normal, non-parametric Kruskal-Wallis test was used for comparison. A Bonferroni correction for multiple (9) comparisons was used; statistical significance was accepted with a p value of 0.005 (0.05/9).

Cardiovascular risk factors that showed a significant association with the CAD-RADS score were included in multivariate regression analysis in order to evaluate their simultaneous influence. Through multiple regression analysis, independent predictors for obstructive CAD (CAD-RADS score  $\geq 3$ ) were identified.

Two prediction models for CAD-RADS score  $\geq 3$  were developed using area under the operating characteristic curve (AUC) analysis. When appropriate, a 95% confidence interval (CI) was calculated.

For all comparisons, a p value of  $<0.05$  was considered statistically significant. The statistical analysis was performed using commercially available software (MedCalc for Windows, version 14.8, MedCalc Software, Ostend, Belgium).

## Results

### *Demographic and Clinical Data*

The clinical and angiographic characteristics of our study population are shown in Table 1. Among the 475 patients included in this study, the mean age was  $57.8 \pm 13.2$  years and the majority of them were females: 54.4%. There was a high prevalence of both hypertensive (74.5%) and dyslipidemic (64.2%) patients. The percentage of diabetic subjects was relatively small, with only 19.3% individuals having this condition. The majority of the patients included in this study were symptomatic, 72.6 % presenting with either typical or atypical angina.

When we classified the patients according to the CAD-RADS score, 177 of them had CAD-RADS score=0, 99 patients had CAD-RADS score=1 while 80 subjects CAD-RADS score=2. A percentage of 14.1% of people included in this study were diagnosed with CAD-RADS 3 score. Finally, 9.3% patients had severe stenosis, with a CAD-RADS score of 4 and 5 subjects had total occlusion of a coronary segment (CAD-RADS score=5).

### *CAD-RADS score and multiple cardiovascular risk factors*

Using the cardiovascular risk factors mentioned above, we tested if there is any association regarding their presence and the severity of coronary artery disease (Table 2).

Our results show that a CAD-RADS score of 0 was more frequent in younger patients, with a mean age of  $48.8 \pm 12.1$  years in this subgroup, while patients older than 60-years old were more likely to develop coronary atherosclerotic plaques and more significant coronary stenosis.



1  
2  
3 Regarding the gender, subjects with higher CAD-RADS score were more frequently males. More  
4 than 55% of the patients who were diagnosed with CAD-RADS score  $\geq 2$  were males, while the  
5 majority of the female patients (69.3%) received a CAD-RADS score of 0 or 1.  
6

7  
8 Our findings indicated a positive association between systolic hypertension and CAD-RADS  
9 score, with over 90% of the subjects with moderate/severe stenosis (CAD-RADS  $\geq 3$ ) being  
10 hypertensive. Moreover, based on our results, patients with CAD-RADS scores  $\geq 3$  had a greater  
11 frequency of dyslipidemia, with more than 85% patients in these categories being also  
12 dyslipidemic.  
13

14  
15 Furthermore, the proportion of smokers was larger among patients identified with higher CAD-  
16 RADS scores: over two-third of the patients who received a CAD-RADS score  $\geq 2$  admitted the  
17 use of cigarettes. On the other hand, in the CAD-RADS groups of 0 and 1, the percentage of the  
18 smokers was less than 50%.  
19

20  
21 Regarding the association between diabetes mellitus and CAD-RADS score, our results show  
22 increasing percents of diabetic individuals proportional with higher CAD-RADS scores: from 9%  
23 diabetic patients in CAD-RADS 0 group to 50% diabetic subjects in CAD-RADS 5 group.  
24 However, the percentage of obese subjects did not differ significantly among different CAD-  
25 RADS groups.  
26

27  
28 The percentage of symptomatic patients was higher among the subjects with greater  
29 atherosclerotic burden, with more than 65% people diagnosed with CAD-RADS score  $\geq 3$   
30 presenting with typical angina.  
31

32  
33 Finally, the severity of coronary artery stenosis increased significantly with CACS.  
34

### 35 ***Multivariate analysis***

36  
37 According to the multivariate analysis, male sex, age  $\geq 60$  years, hypertension, dyslipidemia and  
38 typical angina remained major predictors of obstructive CAD defined as CAD-RADS score  $\geq$   
39 3 (Table 3). Males had almost 4 times higher odds of developing significant coronary stenosis. The  
40 odds ratio for coronary stenosis  $\geq 50\%$  was approximately 2-fold greater in individuals over 60-  
41 years old. Our results showed that having dyslipidemia significantly increased the odds of  
42 moderate/severe coronary stenosis by more than 3 times. Hypertension was correlated with  
43 increased odds of having CAD-RADS score  $\geq 3$  by approximately 3 times. Last but not least, our  
44 findings revealed that the odds ratio for significant coronary stenosis was more than 5-fold  
45 greater for patients who accused typical angina.  
46

47  
48 We developed a clinical prediction model for CAD-RADS score  $\geq 3$  in which we included all the  
49 risk factors that proved to be statistically significant in the multivariate analysis. This model had  
50 a good discriminative power (AUC=0.83,  $p < 0.0001$ , 95% CI: 0.797- 0.866). Furthermore, we  
51 developed a second prediction model, adding an imaging factor: CACS to the clinical model.  
52  
53  
54  
55  
56  
57

This model proved improved the prediction performance (AUC= 0.93,  $p < 0.0001$ , 95% CI: 0.902 to 0.950). The ROC curves of these two models are shown in Figure 2.

## Discussion

CAD-RADS is a new CT angiography classification system dating since 2016 and there are only a few studies published in the area of cardiac imaging using the CAD-RADS score. CAD-RADS score is a standardized reporting system for CAD in patients with suspected or known coronary artery disease (19), a system of communication between radiologists and clinicians, to provide a basis for further investigation, diagnosis, management and treatment planning of the patients with coronary artery stenosis. It was demonstrated that using CAD-RADS classification system reduces the human error substantially and improves data integrity (20). Other similar standardized reporting systems were introduced in other fields in medical imaging (breast, prostate, liver or lung) and studies have verified their ability of standardizing patient management (21). To the best of our knowledge, our study is the first one to evaluate the association between multiple cardiovascular risk factors and coronary artery stenosis assessed using CAD-RADS score in a Romanian population.

There are some well known risk factors associated with the development of coronary artery disease and with an increased risk of acute coronary syndrome: male gender, hypertension, diabetes mellitus, hypercholesterolemia, family history, smoking (22). The correlation between cardiovascular risk factors and cardiovascular events was first demonstrated by the Framingham study through an epidemiological approach (23). Afterwards, the association between the presence, the extent, and severity of CAD and cardiovascular risk factors was demonstrated.

Our results are similar to those described in other studies from different countries regarding the association between traditional risk factors and coronary artery disease, coronary artery stenosis or the calcium scoring assessed using Agatston score.

The INTERHEART study (24) shows that the cumulative effect of risk factors increased the risk of CAD, especially of myocardial infarction worldwide, in both sexes and all ages in all region of the world; they accounted for 53% of the population attributable risks of acute myocardial infarction (24). They reported nine risk factors for most of the risks of myocardial infarction: abnormal lipids, smoking, hypertension, diabetes, abdominal obesity, psychosocial factors, consumption of fruits, vegetables and alcohol, and regular physical activity (24). Collectively, these factors accounted for 90% of the population attributable risks in men and 94% in women (24).

Our research reports that male sex, age over 60 years, hypertension, dyslipidemia and typical angina are the major predictors of obstructive CAD defined as CAD-RADS score  $\geq 3$ . A positive association between coronary artery burden estimated through CAD-RADS 0-5 score and diabetes mellitus and smoking was established. These risk factors were found with high values in

1  
2  
3 the majority of studies (22, 24-28). Cumulative effect of major risk factors increased the  
4 prevalence of CAD.  
5

6  
7 In our study, the most important cardiovascular risk factor with a high prevalence (74.5%) was  
8 hypertension, with over 85% of our subjects having moderate/severe stenosis with CAD-RADS  
9 score  $\geq 3$ . Hypertension was reported as an important factor for CAD (54.4%) by Al-Mukhtar et  
10 al (26). Mirza et al reported that the most prevalent risk factor for CAD was obesity (86%),  
11 followed by smoking (62%) and hypertension (24%) (27). Konishi et al have found that the  
12 pericardial fat is more highly associated with early development of CAD than simple  
13 anthropometric measures of abdominal obesity (28). Pericardial fat volume was reported as a  
14 indicator of abdominal fat, and not waist circumference, and it was associated independently and  
15 significantly with the presence of coronary plaques (28). In our study, obesity was defined as  
16 body mass index (BMI)  $\geq 30$  kg/m<sup>2</sup>. The prevalence of obesity in our group was of 42.3%. We  
17 did not find a direct association between obesity and coronary artery burden defined by CAD-  
18 RADS score in univariate or multivariate analysis. Obesity was constantly present at all levels of  
19 CAD-RADS, but not associated with the severity of it. Medakovic et al, who reported a prevalence  
20 of 81% of above normal weight (48.8% overweight and 32.2% obese) in their study group, also  
21 did not find a direct association between the obesity and the degree of coronary stenosis (29). In a  
22 study conducted by Dores H et al, obesity assessed by BMI was an indicator of the presence of  
23 CAD, but it wasn't correlated with its severity (30). They also described an "obesity paradox",  
24 which was previously documented by other studies, with better outcomes after percutaneous  
25 coronary interventions at patients with a higher BMI (30). There is a controversy regarding  
26 obesity and several explanations are given for this paradox, the answer still being in debate (30).  
27  
28  
29  
30  
31  
32  
33

34 One of the most powerful associations with an advanced CAD-RADS score was represented by  
35 male gender, over 56% at CAD-RADS 2, reaching 100% at CAD-RADS 5. This is one of the most  
36 established risk factors associated with coronary artery disease (27, 31-33).  
37  
38

39 Smoking, known as one of the factors that promotes inflammation, being thus involved in  
40 atherogenesis (31), was associated with the presence and severity of CAD, but not with  
41 obstructive CAD (CAD-RADS  $\geq 3$ ). This is rather a surprising fact, but there are also other  
42 studies published in literature where there was not found an association between smoking and  
43 high coronary artery burden (29) or between smoking and coronary artery calcium score for  
44 predicting patient mortality risk (33). Medakovic et al explained its possible lack of association  
45 because of the low prevalence of smokers in its study (12.3%) (29), but in our study, the  
46 prevalence of smokers was 46.3%, that being almost half of the patients. The same connection  
47 was found regarding diabetes mellitus and CAD-RADS, one explanation being that only 19.3%  
48 of our study group had diabetes as their comorbidity.  
49  
50  
51  
52

53 There is a direct association between calcium scoring and CAD-RADS score. Also, extensive  
54 calcified plaques (Ca scoring  $\geq 400$ ) (33) were correlated with coronary stenosis higher than 70%  
55 (CAD-RADS 4 and 5) in our results.  
56  
57

## Limitations of the study

Our study has several limitations, the most important one being the fact that it is a retrospectively conducted one. Secondary, our results were confined to the experience of a single medical center and the findings of this study were based on a relatively small patient population. Regarding the risk factors, dyslipidemia was not analyzed by fractions of the cholesterol: LDL-C and HDL-C. Also, we did not analyze other additional risk factors like alcohol use, physical activity, anthropometric measurements or C-reactive protein levels. Taking the retrospective approach into consideration, our research assess only the association between traditionally known cardiovascular risk factors and coronary stenosis evaluated by CAD-RADS score and does not assess the incidence of major cardiac events after performing the CT angiography.

## Conclusion

In conclusion, our study demonstrates that there is a significant association between multiple cardiovascular risk factors and a higher coronary atherosclerotic burden assessed using CAD-RADS score. We consider that the evaluation of CAD-RADS score as a predictive factor for acute cardiac events should be the main subject of future prospective investigation.

### Author contributions:

- Conception (constructing the idea for research): Loredana E. Popa, Mircea M. Buruian
- Design (planning methodology to reach the conclusion): Loredana E. Popa, Diana Feier, Andrei Lebovici, Raluca Rancea
- Supervision (organising and supervising the course of the project): Loredana E. Popa, Mircea M. Buruian, Adrian Molnar
- Data Collection and Processing: Raluca Rancea, Calin Schiau, Cristina Catana, Claudia G. Moldovanu, Bianca Petresc
- Analysis and interpretation: Bianca Petresc, Diana Feier
- Literature Review: Bianca Petresc, Calin Schiau, Cristina Catana, Claudia G. Moldovanu
- Writing of the manuscript: Loredana E. Popa, Bianca Petresc, Cristina Catana, Claudia G. Moldovanu
- Critical Review: Adrian Molnar, Andrei Lebovici, Diana Feier, Mircea M. Buruian

**Acknowledgements:** None.

**Funding:** This research received no specific grant from any funding agency in the public, commercial or not-for-profit sectors.

**Competing interest:** None declared.

**Ethics approval:** The study was approved by the Ethics Committees of Univeristy of Medicine and Pharmacy “Iuliu Hatieganu” Cluj-Napoca (455/19.12.2018) and University of Medicine and Pharmacy Targu Mures (272/21.11.2018). Institutional review board approval was obtained for this study (1339/25.09.2018).

**Patient consent for publication:** Not required.

**Data sharing statement:** Deidentified participant data are available upon request through the corresponding author BP. ORCID identifier 0000-0003-2167-9350.

## References

1. Timmis A, Townsend N, Gale C, Grobbee R, Maniadakis N, Flather M, et al. European society of cardiology: cardiovascular disease statistics 2017. *Eur Heart J.* 2018; 39:508–79.
2. Moran AE, Forouzanfar MH, Roth GA, Mensah GA, Ezzati M, Murray CJ, Naghavi M. Temporal trends in ischemic heart disease mortality in 21 world regions, 1980 to 2010: the Global Burden of Disease 2010 study. *Circulation* 2014 129(14):1483-92.
3. Piepoli MF, Hoes AW, Agewall S, Albus C, Brotons C, Catapano A, et al. 2016 European Guidelines on cardiovascular disease prevention in clinical practice: The Sixth Joint Task Force of the European Society of Cardiology and Other Societies on Cardiovascular Disease Prevention in Clinical Practice (constituted by representatives of 10 societies and by invited experts) Developed with the special contribution of the European Association for Cardiovascular Prevention & Rehabilitation (EACPR). *Eur Heart J.* 2016; 37(29):2315-81.
4. Rivera JJ, Nasir K, Cox PR, Choi EK, Yoon Y, Cho I, et al. Association of traditional cardiovascular risk factors with coronary plaque sub-types assessed by 64-slice computed tomography angiography in a large cohort of asymptomatic subjects. *Atherosclerosis* 2009;206:451–57.
5. Rapsomaniki E, Timmis A, George J, Pujades-Rodriguez M, Shah AD, Denaxas S, et al. Blood pressure and incidence of twelve cardiovascular diseases: lifetime risks, healthy life-years lost, and age-specific associations in 1.25 million people. *Lancet* 2014;383(9932):1899-1911.
6. Pekkanen J, Linn S, Heiss G, Suchindran CM, Leon A, Rifkind BM, Tyroler HA. Ten-year mortality from cardiovascular disease in relation to cholesterol level among men with and without preexisting cardiovascular disease. *N Eng J Med.* 1990;322:1700–07.
7. Greenland P, Knoll MD, Stamler J, Neaton JD, Dyer AR, Garside DB, et al. Major Risk Factors as Antecedents of Fatal and Nonfatal Coronary Heart Disease Events. *JAMA* 2003;290(7):891–7.
8. Canto JG, Kiefe CI, Rogers WJ, Peterson ED, Frederick PD, French WJ, et al. Number of coronary heart disease risk factors and mortality in patients with first myocardial infarction. *JAMA* 2011;306(19):2120-7.
9. Kronmal RA, McClelland RL, Detrano R, Shea S, Lima JA, Cushman M, et al. Risk factors for the progression of coronary artery calcification in asymptomatic subjects: results from the Multi-Ethnic Study of Atherosclerosis (MESA). *Circulation* 2007; 115:2722–30.

10. D'Agostino RB Sr, Vasan RS, Pencina MJ, Wolf PA, Cobain M, Massaro JM, et al. General cardiovascular risk profile for use in primary care: the Framingham Heart Study. *Circulation* 2008; 117:743–53.
11. Conroy RM, Pyorala K, Fitzgerald AP, Sans S, Menotti A, De Baker S, et al. Estimation of ten-year risk of fatal cardiovascular disease in Europe: the SCORE project. *Eur Heart J*. 2003; 24:987–1003.
12. Mangla A, Oliveros E, Williams KA Sr, Kalra DK. Cardiac imaging in the diagnosis of coronary artery disease. *Curr Probl Cardiol*. 2017;42:316–66.
13. Montalescot G, Sechtem U, Achenbach S, Andreotti F, Arden C, Budaj A et al. 2013 ESC guidelines on the management of stable coronary artery disease: The task force on the management of stable coronary artery disease of the European Society of Cardiology. *Eur Heart J*. 2013;34:2949-3003.
14. Hadamitzky M, Taubert S, Deseive S, Byrne RA, Martinoff S, Schömig A, et al. Prognostic value of coronary computed tomography angiography during 5 years of follow-up in patients with suspected coronary artery disease. *Eur Heart J*. 2013;34:3277–85.
15. Nadjiri J, Hausleiter J, Jahnichen C, Will A, Hendrich E, Martinoff S, et al. Incremental prognostic value of quantitative plaque assessment in coronary CT angiography during 5 years of follow up. *J Cardiovasc Comput Tomogr*. 2016;10:97–104.
16. Blanke P, Naoum C, Ahmadi A, Cheruvu C, Soon J, Arepalli C, et al. Long-term prognostic utility of coronary CT angiography in stable patients with diabetes mellitus. *JACC Cardiovasc Imaging* 2016;9:1280–8.
17. Deseive S, Shaw LJ, Min JK, Achenbach S, Andreini D, Al-Mallah MJ, et al. Improved 5-year prediction of all cause mortality by coronary CT angiography applying the confirm score. *Eur Heart J Cardiovasc Imaging* 2017;18:286–93.
18. Andreini D, Pontone G, Mushtaq S, Gransar H, Conte E, Bartorelli AL, et al. Long-term prognostic impact of CT-Leaman score in patients with non-obstructive CAD: results from the coronary CT angiography evaluation for Clinical Outcomes International Multicenter (CONFIRM) study. *Int J Cardiol*. 2017;231:18–25.
19. Cury RC, Abbara S, Achenbach S, Agatston A, Berman DS, Budoff MJ et al. CAD-RADS(tm) coronary artery disease—reporting and data system. An expert consensus document of the society of cardiovascular computed tomography (SCCT), the American College of Radiology (ACR) and the North American Society for Cardiovascular Imaging (NASCI). Endorsed by the American College of Cardiology. *J Cardiovasc Comput Tomogr*. 2016;10:269–81.
20. Abdel Razek AAK, Elrakhawy MM, Yossof MM, Nageb HM. Inter-observer agreement of the Coronary Artery Disease Reporting and Data System (CAD-RADSTM) in patients with stable chest pain. *Pol J Radiol*. 2018;83:e151–159.
21. Szilveszter B, Kolossváry M, Karády J, Jermendy ÁL, Károlyi M, Panajotu A, et al. Structured reporting platform improves CAD-RADS assessment. *J Cardiovasc Comput Tomogr*. 2017;11(6):449–54.

22. Trianti M, Xanthos T, Iacovidou N, Dages N, Lekakis JP, Kyriakou F, et al. Relationship between individual cardiovascular risk factors and localization of coronary atherosclerotic lesions. *Heart Lung*. 2011;40(3):201–7.
23. Dawber TR, Meadors GF, Moore FE. Epidemiological Approaches to Heart Disease: The Framingham Study. *Am J Public Health Nations Health* 1951;41(3):279–86.
24. Yusuf S, Hawken S, Ounpuu S, Dans T, Avezum A, Lanus F, et al. Effects of potentially modifiable risk factors associated with myocardial infarction in 52 countries (the INTERHEART study): case–control study. *Lancet* 2004;364:937–52.
25. Horimoto M, Hasegawa A, Ozaki T, Takenaka T, Igarashi K, Inoue H. Independent predictors of the severity of angiographic coronary atherosclerosis: the lack of association between impaired glucose tolerance and stenosis severity. *Atherosclerosis* 2005;182(1):113–9.
26. Al-Mukhtar SB, Ahmad AJ. Comparison between quantitative and qualitative biochemical markers in the diagnosis of acute coronary syndrome. *Iraq J Pharm*. 2011; 11:101-9.
27. Mirza AJ, Taha AY, Khedhir BR. Risk factors for acute coronary syndrome in patients below the age of 40 years. *Egypt Heart J*. 2018;70(4):233–35.
28. Konishi M, Sugiyama S, Sugamura K, Nozaki T, Ohba K, Matsubara J, et al. Association of pericardial fat accumulation rather than abdominal obesity with coronary atherosclerotic plaque formation in patients with suspected coronary artery disease. *Atherosclerosis* 2010; 209(2):573–78.
29. Medakovic P, Biloglav Z, Padjen I, Pristas I, Jukic M, Zuvella F, et al. Quantification of coronary atherosclerotic burden with coronary computed tomography angiography: adapted Leaman score in Croatian patients. *Int J Cardiovasc Imaging* 2018; 34(10):1647–55.
30. Dores H, de Araújo Gonçalves P, Carvalho MS, Sousa PJ, Ferreira A, Cardim N, et al. Body mass index as a predictor of the presence but not the severity of coronary artery disease evaluated by cardiac computed tomography. *Eur J Prev Cardiol*. 2014; 21(11):1387–93.
31. Oikonomou EK, Marwan M, Desai MY, Mancio J, Alashi A, Centeno EH, et al. Non-invasive detection of coronary inflammation using computed tomography and prediction of residual cardiovascular risk (the CRISP CT study): a post-hoc analysis of prospective outcome data. *Lancet* 2018;392(10151):929–39.
32. Ayoub C, Kritharides L, Yam Y, Chen L, Hossain A, Achenbach S, et al. Prognostic value of age adjusted segment involvement score as measured by coronary computed tomography: a potential marker of vascular age. *Heart Vessels* 2018; 33(11):1288–1300.
33. Arnson Y, Rozanski A, Gransar H, Friedman JD, Hayes SW, Thomson LE, et al. Comparison of the Coronary Artery Calcium Score and Number of Calcified Coronary Plaques for Predicting Patient Mortality Risk. *Am J Cardiol*. 2017;120(12):2154-59.

**Table 1. Clinical and CCTA characteristics of the study population**

| Variable                                 | Value       |
|------------------------------------------|-------------|
| Age ~                                    | 57.8 ± 13.2 |
| Male sex*                                | 217 (45.6%) |
| Hypertension*                            | 354 (74.5%) |
| Dyslipidemia*                            | 305 (64.2%) |
| Diabetes mellitus*                       | 92 (19.3%)  |
| Obesity*                                 | 201 (42.3%) |
| Smoking*                                 | 220 (46.3%) |
| Clinical presentation*                   |             |
| Typical angina                           | 222 (46.7%) |
| Atypical angina                          | 123 (25.9%) |
| No chest pain                            | 130 (27.4%) |
| Coronary artery calcium scoring (CACS) * |             |
| 0                                        | 177(37.2%)  |
| 1-10                                     | 52 (10.9%)  |
| 11-100                                   | 88 (18.6%)  |
| 101-400                                  | 83 (17.5%)  |
| >400                                     | 75 (15.8%)  |
| CAD-RADS*                                |             |
| 0                                        | 177(37.2%)  |
| 1                                        | 99 (20.8%)  |
| 2                                        | 80 (16.8%)  |
| 3                                        | 67 (14.1%)  |
| 4                                        | 44 (9.3%)   |
| 5                                        | 8 (1.8%)    |

~ Results are presented as mean±SD

\* Results are presented as number (%)



**Table 2. Distribution of cardiovascular risk factors according to CAD-RADS categories**

| Variable              | Value                 | CAD-RADS 0  | CAD-RADS 1  | CAD-RADS 2   | CAD-RADS 3    | CAD-RADS 4    | CAD-RADS 5     | p value  |
|-----------------------|-----------------------|-------------|-------------|--------------|---------------|---------------|----------------|----------|
| Age                   |                       | 48.8 ± 12.1 | 60.4 ± 11.9 | 63.6 ± 8.7   | 64.6 ± 10.5   | 66.1 ± 10.6   | 64.7 ± 11.1    | p<0.001* |
| Sex                   |                       |             |             |              |               |               |                | p<0.001* |
|                       | Male                  | 55 (31.1%)  | 42 (42.4%)  | 45 (56.2%)   | 39 (58.2%)    | 28 (63.6%)    | 8 (100%)       |          |
|                       | Female                | 122 (68.9%) | 57 (57.6%)  | 35 (43.8%)   | 28 (41.8%)    | 16 (36.4%)    | 0 (0%)         |          |
| Hypertension          |                       |             |             |              |               |               |                | p<0.001* |
|                       | Yes                   | 110 (62.2%) | 70 (70.7%)  | 62 (77.5%)   | 63 (94.0%)    | 42 (95.4%)    | 7 (87.5%)      |          |
|                       | No                    | 67(37.8%)   | 29 (29.3%)  | 18 (22.5%)   | 4 (6.0%)      | 2 (4.6%)      | 1 (12.5%)      |          |
| Dyslipidemia          |                       |             |             |              |               |               |                | p<0.001* |
|                       | Yes                   | 75 (42.3%)  | 68 (68.6%)  | 57 (71.2%)   | 57 (85.0%)    | 41 (93.1%)    | 7 (87.5%)      |          |
|                       | No                    | 102 (57.7%) | 31 (31.7%)  | 23 (28.8%)   | 10 (15.0%)    | 3(6.9%)       | 1(12.5%)       |          |
| Diabetes mellitus     |                       |             |             |              |               |               |                | p<0.001* |
|                       | Yes                   | 16 (9.0%)   | 21(21.2%)   | 21(26.2%)    | 12 (17.9%)    | 18 (40.9%)    | 4 (50.0%)      |          |
|                       | No                    | 161 (91.0%) | 78 (78.8%)  | 59 (73.8%)   | 55 (82.1%)    | 26 (59.1%)    | 4 (50.0%)      |          |
| Obesity               |                       |             |             |              |               |               |                | p=0.63   |
|                       | Yes                   | 68 (38.4%)  | 45 (45.4%)  | 38 (47.5%)   | 29 (43.2%)    | 19 (43.1%)    | 2 (25.0%)      |          |
|                       | No                    | 109 (61.6%) | 54 (54.6%)  | 42 (52.5%)   | 38 (56.8%)    | 25 (56.9%)    | 6 (75.0%)      |          |
| Smoking               |                       |             |             |              |               |               |                | p<0.001* |
|                       | Yes                   | 53 (30.0%)  | 44 (44.4%)  | 48 (60.0%)   | 44 (65.6%)    | 25 (56.9%)    | 6 (75.0%)      |          |
|                       | No                    | 124 (70.0%) | 55 (55.6%)  | 32 (40.0%)   | 23 (34.4%)    | 19 (43.1%)    | 2 (25.0%)      |          |
| Clinical presentation |                       |             |             |              |               |               |                | p<0.001* |
|                       | Typical angina        | 60 (33.9%)  | 35 (35.3%)  | 36 (45.0%)   | 45 (67.1%)    | 39 (88.6%)    | 7 (87.5%)      |          |
|                       | Atypical angina       | 70 (39.5%)  | 25 (25.2%)  | 20 (25.0%)   | 7 (10.4%)     | 1 (2.2%)      | 0 (0%)         |          |
|                       | Nonanginal chest pain | 47 (26.6%)  | 39 (39.5%)  | 24 (30.0%)   | 15 (22.5%)    | 4 (9.2%)      | 1 (12.5%)      |          |
| CACS                  |                       | 0           | 15          | 123          | 303           | 711.3         | 1611.4         |          |
|                       |                       | (0-0)       | (6.2-36.6)  | (55.1-284.5) | (134.8-500.7) | (444.7-958.3) | (949.1-1921.4) | p<0.001* |

\*Obtained p value was considered statistically significant after Bonferroni correction (p<0.005)

Results are presented as mean±SD, number (%), or median (25th-75th percentile)

Abbreviations: CACS: coronary artery calcium score

**Table 3. Logistic regression analysis for the association between cardiovascular risk factors and obstructive CAD (CAD-RADS $\geq$ 3)**

| Variable            | Odds ratio (95% CI)      | p value  |
|---------------------|--------------------------|----------|
| Male sex            | 3.9992 (2.2603 – 5.0758) | <0.0001* |
| Age $\geq$ 60 years | 1.8693 (1.0520 – 2.6213) | 0.0329*  |
| Hypertension        | 2.9038 (1.4536 - 3.9094) | 0.0236*  |
| Obesity             | 0.7052 (0.4200 - 1.1838) | 0.1863   |
| Diabetes mellitus   | 1.4711 (0.8123 - 2.6642) | 0.2027   |
| Dyslipidemia        | 3.2523 (1.9695 - 4.5395) | 0.0015*  |
| Smoking             | 1.6094 (0.9323 - 2.7784) | 0.0876   |
| Typical angina      | 5.1584 (3.9832 - 6.2198) | <0.0001* |

\*Statistically significant p<0.05

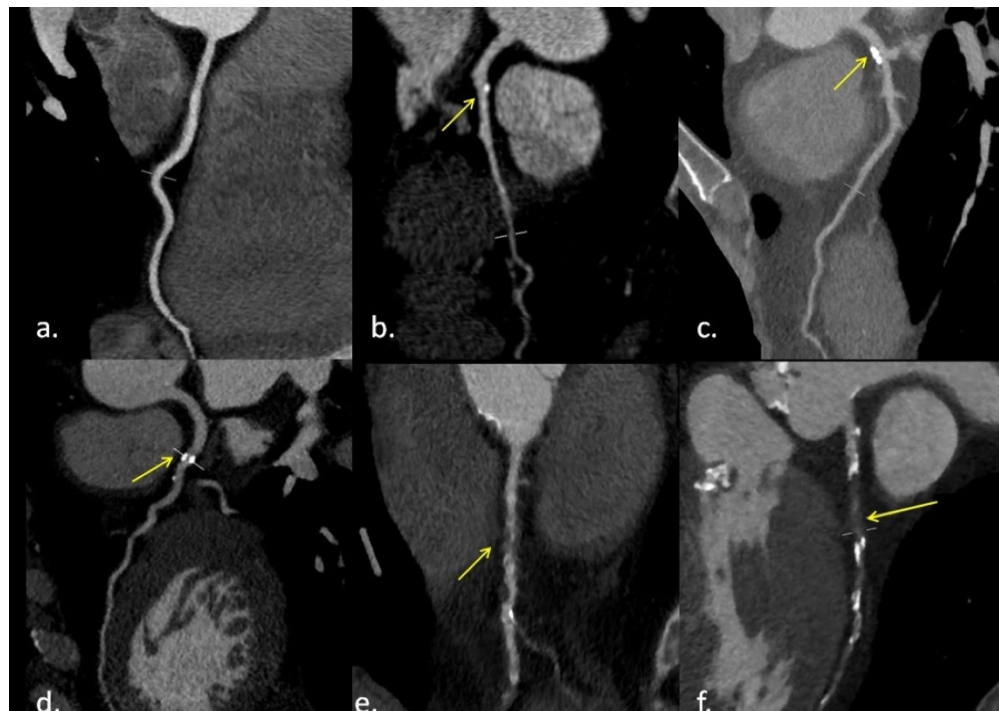

Fig. 1- MPR (multiplanar reconstruction) images showing different degrees of coronary artery stenosis (yellow arrows): a. normal RCA without any plaque or stenosis (CAD-RADS 0), b. small calcified plaque in the proximal LAD with minimal luminal narrowing < 25% (CAD-RADS 1), c. calcified plaque in the proximal LAD with 25-49% diameter stenosis (CAD-RADS 2), d. semi-circumferential calcified plaque in the proximal LAD with 50-69% diameter stenosis (CAD-RADS 3), e. non-calcified plaque in the proximal RCA with 70-99% diameter stenosis (CAD-RADS 4), f. total occlusion of proximal and mid LAD; calcified plaques above and beyond it supports the diagnosis of chronic total occlusion (CAD-RADS 5)

173x122mm (600 x 600 DPI)

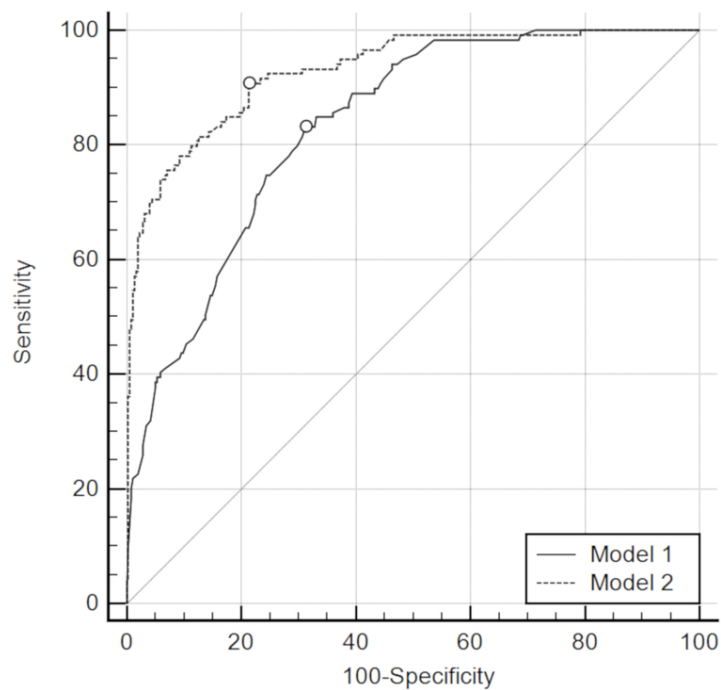

Receiver-operating characteristics (ROC) curves for the prediction models of CAD-RADS score  $\geq 3$   
90x67mm (300 x 300 DPI)

**STROBE 2007 (v4) Statement—Checklist of items that should be included in reports of *cross-sectional studies***

| Section/Topic                | Item # | Recommendation                                                                                                                                                                       | Reported on page # |
|------------------------------|--------|--------------------------------------------------------------------------------------------------------------------------------------------------------------------------------------|--------------------|
| <b>Title and abstract</b>    | 1      | (a) Indicate the study's design with a commonly used term in the title or the abstract                                                                                               | 1                  |
|                              |        | (b) Provide in the abstract an informative and balanced summary of what was done and what was found                                                                                  | 2                  |
| <b>Introduction</b>          |        |                                                                                                                                                                                      |                    |
| Background/rationale         | 2      | Explain the scientific background and rationale for the investigation being reported                                                                                                 | 3,4                |
| Objectives                   | 3      | State specific objectives, including any prespecified hypotheses                                                                                                                     | 4                  |
| <b>Methods</b>               |        |                                                                                                                                                                                      |                    |
| Study design                 | 4      | Present key elements of study design early in the paper                                                                                                                              | 4                  |
| Setting                      | 5      | Describe the setting, locations, and relevant dates, including periods of recruitment, exposure, follow-up, and data collection                                                      | 4                  |
| Participants                 | 6      | (a) Give the eligibility criteria, and the sources and methods of selection of participants                                                                                          | 4                  |
| Variables                    | 7      | Clearly define all outcomes, exposures, predictors, potential confounders, and effect modifiers. Give diagnostic criteria, if applicable                                             | 5                  |
| Data sources/<br>measurement | 8*     | For each variable of interest, give sources of data and details of methods of assessment (measurement). Describe comparability of assessment methods if there is more than one group | 5                  |
| Bias                         | 9      | Describe any efforts to address potential sources of bias                                                                                                                            | 5                  |
| Study size                   | 10     | Explain how the study size was arrived at                                                                                                                                            | 5                  |
| Quantitative variables       | 11     | Explain how quantitative variables were handled in the analyses. If applicable, describe which groupings were chosen and why                                                         | 5                  |
| Statistical methods          | 12     | (a) Describe all statistical methods, including those used to control for confounding                                                                                                | 5,6                |
|                              |        | (b) Describe any methods used to examine subgroups and interactions                                                                                                                  | 5,6                |
|                              |        | (c) Explain how missing data were addressed                                                                                                                                          | 5,6                |
|                              |        | (d) If applicable, describe analytical methods taking account of sampling strategy                                                                                                   | 5,6                |
|                              |        | (e) Describe any sensitivity analyses                                                                                                                                                | 5,6                |
| <b>Results</b>               |        |                                                                                                                                                                                      |                    |

|                          |     |                                                                                                                                                                                                              |     |
|--------------------------|-----|--------------------------------------------------------------------------------------------------------------------------------------------------------------------------------------------------------------|-----|
| Participants             | 13* | (a) Report numbers of individuals at each stage of study—eg numbers potentially eligible, examined for eligibility, confirmed eligible, included in the study, completing follow-up, and analysed            | 6   |
|                          |     | (b) Give reasons for non-participation at each stage                                                                                                                                                         | 6   |
|                          |     | (c) Consider use of a flow diagram                                                                                                                                                                           | 6   |
| Descriptive data         | 14* | (a) Give characteristics of study participants (eg demographic, clinical, social) and information on exposures and potential confounders                                                                     | 6   |
|                          |     | (b) Indicate number of participants with missing data for each variable of interest                                                                                                                          | 6   |
| Outcome data             | 15* | Report numbers of outcome events or summary measures                                                                                                                                                         | 6,7 |
| Main results             | 16  | (a) Give unadjusted estimates and, if applicable, confounder-adjusted estimates and their precision (eg, 95% confidence interval). Make clear which confounders were adjusted for and why they were included | 6,7 |
|                          |     | (b) Report category boundaries when continuous variables were categorized                                                                                                                                    | 6,7 |
|                          |     | (c) If relevant, consider translating estimates of relative risk into absolute risk for a meaningful time period                                                                                             |     |
| Other analyses           | 17  | Report other analyses done—eg analyses of subgroups and interactions, and sensitivity analyses                                                                                                               | 6,7 |
| <b>Discussion</b>        |     |                                                                                                                                                                                                              |     |
| Key results              | 18  | Summarise key results with reference to study objectives                                                                                                                                                     | 8,9 |
| Limitations              | 19  | Discuss limitations of the study, taking into account sources of potential bias or imprecision. Discuss both direction and magnitude of any potential bias                                                   | 9   |
| Interpretation           | 20  | Give a cautious overall interpretation of results considering objectives, limitations, multiplicity of analyses, results from similar studies, and other relevant evidence                                   | 8,9 |
| Generalisability         | 21  | Discuss the generalisability (external validity) of the study results                                                                                                                                        | 8,9 |
| <b>Other information</b> |     |                                                                                                                                                                                                              |     |
| Funding                  | 22  | Give the source of funding and the role of the funders for the present study and, if applicable, for the original study on which the present article is based                                                | 10  |

\*Give information separately for cases and controls in case-control studies and, if applicable, for exposed and unexposed groups in cohort and cross-sectional studies.

**Note:** An Explanation and Elaboration article discusses each checklist item and gives methodological background and published examples of transparent reporting. The STROBE checklist is best used in conjunction with this article (freely available on the Web sites of PLoS Medicine at <http://www.plosmedicine.org/>, Annals of Internal Medicine at <http://www.annals.org/>, and Epidemiology at <http://www.epidem.com/>). Information on the STROBE Initiative is available at [www.strobe-statement.org](http://www.strobe-statement.org).

# BMJ Open

## Cardiovascular risk factors as predictors of coronary artery disease assessed using CAD-RADS classification: a cross-sectional study in Romanian population

|                                 |                                                                                                                                                                                                                                                                                                                                                                                                                                                                                                                                                                                                                                                                                                                                                                                                                                                                                                                                                                                                                                                                   |
|---------------------------------|-------------------------------------------------------------------------------------------------------------------------------------------------------------------------------------------------------------------------------------------------------------------------------------------------------------------------------------------------------------------------------------------------------------------------------------------------------------------------------------------------------------------------------------------------------------------------------------------------------------------------------------------------------------------------------------------------------------------------------------------------------------------------------------------------------------------------------------------------------------------------------------------------------------------------------------------------------------------------------------------------------------------------------------------------------------------|
| Journal:                        | <i>BMJ Open</i>                                                                                                                                                                                                                                                                                                                                                                                                                                                                                                                                                                                                                                                                                                                                                                                                                                                                                                                                                                                                                                                   |
| Manuscript ID                   | bmjopen-2019-031799.R1                                                                                                                                                                                                                                                                                                                                                                                                                                                                                                                                                                                                                                                                                                                                                                                                                                                                                                                                                                                                                                            |
| Article Type:                   | Original research                                                                                                                                                                                                                                                                                                                                                                                                                                                                                                                                                                                                                                                                                                                                                                                                                                                                                                                                                                                                                                                 |
| Date Submitted by the Author:   | 05-Nov-2019                                                                                                                                                                                                                                                                                                                                                                                                                                                                                                                                                                                                                                                                                                                                                                                                                                                                                                                                                                                                                                                       |
| Complete List of Authors:       | Popa, Loredana; University of Medicine and Pharmacy Targu Mures, Radiology; Hiperdia-Affidea Imaging Center<br>Petresc, Bianca; Cluj-Napoca County Emergency Hospital, Radiology<br>Cătană, Cristina; Cluj-Napoca County Emergency Hospital, Radiology<br>Moldovanu, Claudia; Cluj-Napoca County Emergency Hospital, Radiology<br>Feier, Diana; Iuliu Hațieganu University of Medicine and Pharmacy; Hiperdia-Affidea Imaging Center, Radiology<br>Lebovici, Andrei; Iuliu Hațieganu University of Medicine and Pharmacy, Radiology; Hiperdia-Affidea Imaging Center, Radiology<br>Schiau, Călin; Iuliu Hațieganu University of Medicine and Pharmacy, Radiology<br>Rancea, Raluca; Heart Institute Nicolae Stancioiu Cluj-Napoca, Cardiology<br>Molnar, Adrian; Heart Institute Nicolae Stancioiu Cluj-Napoca, Cardiovascular Surgery; Iuliu Hațieganu University of Medicine and Pharmacy, Cardiovascular and Thoracic Surgery<br>Buruian, Mircea; University of Medicine and Pharmacy Targu Mures, Radiology; Emergency County Hospital Targu-Mures, Radiology |
| <b>Primary Subject Heading</b>: | Cardiovascular medicine                                                                                                                                                                                                                                                                                                                                                                                                                                                                                                                                                                                                                                                                                                                                                                                                                                                                                                                                                                                                                                           |
| Secondary Subject Heading:      | Radiology and imaging                                                                                                                                                                                                                                                                                                                                                                                                                                                                                                                                                                                                                                                                                                                                                                                                                                                                                                                                                                                                                                             |
| Keywords:                       | coronary artery disease, coronary CT angiography, CAD-RADS, cardiovascular risk factors                                                                                                                                                                                                                                                                                                                                                                                                                                                                                                                                                                                                                                                                                                                                                                                                                                                                                                                                                                           |
|                                 |                                                                                                                                                                                                                                                                                                                                                                                                                                                                                                                                                                                                                                                                                                                                                                                                                                                                                                                                                                                                                                                                   |

SCHOLARONE™  
Manuscripts

# Cardiovascular risk factors as predictors of coronary artery disease assessed using CAD-RADS classification: a cross-sectional study in Romanian population

## Authors:

Loredana Elisabeta Popa<sup>1,2</sup>, Bianca Petresc<sup>3</sup>, Cristina Cătană<sup>3</sup>, Claudia Gabriela Moldovanu<sup>3</sup>, Diana-Sorina Feier<sup>2,3,4</sup>, Andrei Lebovici<sup>2,3,4</sup>, Călin Schiau<sup>4</sup>, Raluca Alina Rancea<sup>5</sup>, Adrian Molnar<sup>6,7</sup>, Mircea Marian Buruian<sup>1,8</sup>

## Affiliations:

1. Department of Radiology, University of Medicine and Pharmacy Targu Mures  
Address: Gh. Marinescu Street, nr. 50, 540136, Targu Mures, Romania
2. Department of Radiology, Hiperdia-Affidea Imaging Center Cluj-Napoca  
Address: Republicii Street, nr. 105A, 400000, Cluj-Napoca, Romania
3. Department of Radiology, County Emergency Hospital Cluj-Napoca  
Address: Clinicilor Street, nr. 1-3, 400006, Cluj-Napoca, Romania
4. Department of Radiology, “Iuliu Hațieganu” University of Medicine and Pharmacy, Cluj-Napoca, Romania  
Address: Clinicilor Street, nr. 1-3, 400006, Cluj-Napoca, Romania
5. Department of Cardiology, Heart Institute “Nicolae Stancioiu” Cluj-Napoca  
Address: Mitor Street, nr. 19-21, 400001 Cluj-Napoca, Romania
6. Department of Cardiovascular Surgery, Heart Institute “Nicolae Stancioiu” Cluj-Napoca  
Romania  
Address: Mitor Street, nr. 19-21, 400001 Cluj-Napoca, Romania
7. Department of Cardiovascular and Thoracic Surgery Surgery, “Iuliu Hațieganu”  
University of Medicine and Pharmacy, Cluj-Napoca, Romania  
Address: Mitor Street, nr. 19-21, 400001 Cluj-Napoca, Romania
8. Department of Radiology, Emergency County Hospital Targu Mures  
Address: Gh. Marinescu Street, nr. 50, 540136, Targu Mures, Romania

## Corresponding Author:

Bianca Petresc

Email: bianca.petresc@gmail.com

Phone: +40734714327

Address: Department of Radiology, County Emergency Hospital Cluj-Napoca, Clinicilor Street, nr. 1-3, 400006, Cluj-Napoca, Romania

ORCID: 0000-0003-2167-9350



## Abstract

**Objectives:** The aim of this study was to evaluate the association between cardiovascular risk factors and CAD-RADS score in the Romanian population. CAD-RADS is a new, standardized method to assess coronary artery disease (CAD) using coronary computed tomography angiography (CCTA).

**Design:** A cross-sectional observational, patient-based study.

**Setting:** Referred imaging centre for coronary artery disease in Transylvania, Romania.

**Participants:** We retrospectively reviewed 674 patients who underwent CCTA between January 2017 and August 2018. The exclusion criteria included: previously known CAD, defined as prior myocardial infarction, percutaneous coronary intervention or coronary artery bypass graft surgery (n=91), cardiac CT for other than evaluation of possible CAD (n=85), significant arrhythmias compromising imaging quality (n=23). Finally, 475 patients fulfilled the inclusion criteria.

**Methods:** Demographical, clinical and CCTA characteristics of the patients were obtained. Coronary artery disease was evaluated using CAD-RADS score. Obstructive CAD was defined as  $\geq 50\%$  stenosis of  $\geq 1$  coronary segment on CCTA.

**Results:** We evaluated the association between risk factors and CAD-RADS score in univariate and multivariable analysis. We divided the patients into 2 groups according to the CAD-RADS system: group 1: CAD-RADS score between 0-2 (stenosis  $< 50\%$ ) and group 2: CAD-RADS score  $\geq 3$  (stenosis  $\geq 50\%$ ). On univariate analysis, male gender, age, hypertension, dyslipidemia, smoking and diabetes mellitus were positively associated with a CAD-RADS score  $\geq 3$ . On the multivariable analysis, male sex, age, dyslipidemia, hypertension and smoking remained major predictors of obstructive CAD.

**Conclusion:** This study demonstrated that there is a significant association between multiple cardiovascular risk factors and a higher coronary atherosclerotic burden assessed using CAD-RADS system in the Romanian population.

**Keywords:** coronary artery disease; coronary CT angiography; CAD-RADS; cardiovascular risk factors

## Article Summary

### Strengths and limitations of this study

- This is the first study to evaluate the association of cardiovascular risk factors and coronary artery disease assessed using coronary CT angiography in Romania.
- We quantified the coronary artery stenosis using the CAD-RADS classification, the newest, standardized method for reporting CAD.
- The patients were recruited from a single centre; therefore, the study population was relatively small.
- Another limitation is the design of the study: a cross-sectional, retrospective one.

### Introduction

Coronary artery disease (CAD) is one of the major causes of morbidity and mortality worldwide. Despite the fact that CAD mortality rates have declined since 1980s, it still accounts for approximately one-third of all deaths of individuals aged over 35 years old(1,2).

It is well-known that atherosclerosis is the underlying cause of cardiovascular diseases and multiple risk factors augment the atherosclerotic process. These risk factors include non-modifiable ones such as age and sex and modifiable risk factors such as hypertension, dyslipidemia, obesity, diabetes mellitus and smoking (3-7). Studies suggest that the majority of patients with CAD have at least one modifiable risk factor and their presence has an impactful role in the progression of CAD (8, 9).

Prognostic assessment is very important in the management of the patients with CAD. Therefore, many risk-scoring systems have been developed such as Framingham and SCORE, which are based on the presence of various traditional cardiovascular risk factors (10, 11).

Moreover, with the recent advancements made in medical technology, coronary CT angiography (CCTA) has rapidly evolved into one of the most highly accurate methods for diagnosis and evaluation of CAD. It is an unique non-invasive test which can provide direct and accurate visualization of the coronary vessel lumen, being able to quantify the presence and extent of coronary stenosis and to assess the characteristics of coronary atherosclerotic plaques (12).

CCTA has been included in the latest ESC guideline on the management of stable artery disease, being categorized as class II LOE C recommendation. CCTA should be used for risk stratification in patients with stable CAD who are in the lower range of intermediate pre-test probability. Also, it can be considered for patients who are unable to exercise or to perform a stress test or for patients with inconclusive functional test results (13).

In recent years, many studies have been conducted to evaluate the short and long-term prognostic importance of CCTA. They demonstrate the fact that measurements of both stenosis severity and

1  
2  
3 plaque features provide powerful prognostic information superior to traditional cardiovascular  
4 risk factors (14-18).  
5

6  
7 In 2016, the Society of Cardiovascular Computed Tomography published the CAD-RADS  
8 grading system, which is a standardized reporting method of CCTA results. This is meant to  
9 facilitate communication of the results along with suggestions for consecutive management of the  
10 patients. The grading system ranges from 0 to 5, where CAD-RADS 0 score means complete  
11 absence of stenosis and CAD-RADS 5 represents total occlusion of at least 1 coronary segment  
12 (19).  
13  
14

15 The aim of this study is to evaluate the association between traditional cardiovascular risk factors  
16 and coronary artery disease evaluated using the CAD-RADS score.  
17  
18

## 19 **Methods**

### 20 *Study population*

21  
22 We retrospectively reviewed 674 consecutive patients who underwent CCTA between January  
23 2017 and August 2018 in our institution. The indications for CCTA were: atypical angina, typical  
24 angina with an inconclusive stress test, patients with intermediate/high-risk for major cardiac  
25 events. The exclusion criteria included: previously known CAD, defined as prior myocardial  
26 infarction, percutaneous coronary intervention or coronary artery bypass graft surgery (n=91),  
27 cardiac CT for other than evaluation of possible CAD (n=85), significant arrhythmias  
28 compromising imaging quality (n=23). Beside these exclusion criteria, patients with renal failure,  
29 documented contrast allergy or pregnant women did not perform the CT examination. Finally,  
30 475 patients fulfilled the inclusion criteria.  
31  
32  
33  
34  
35

### 36 *Scan protocol*

37  
38 All CCTA scans were performed with a 64-sliced multi-detector CT (Sensation 64, Siemens,  
39 Forchheim, Germany). The scanning parameters were: slices/collimation 64/0.6 mm, tube voltage  
40 120 kv, 850 mAs, gantry rotation time 330 ms, pitch 0.2, effective slice thickness 0.75 mm and  
41 reconstruction increment 0.4 mm. Patients with a heart-rate > 70 bpm received premedication  
42 with oral beta-blockers 1 hour prior the examination. Short-acting nitroglycerine sublingual spray  
43 was administered to all patients for coronary vasodilatation.  
44  
45  
46

47 First, a non-contrast enhanced scan was performed in order to assess the coronary artery calcium  
48 score (CACS). This scan was followed by the coronary computed tomography angiography  
49 (CCTA) to evaluate the coronary artery lumen and to characterize the atherosclerotic plaques. A  
50 bolus of 80 ml of iodinated contrast medium was administered intravenously at 5 ml/sec,  
51 followed by 40 ml of saline injected at the same rate. After the acquisition, the images were  
52 transferred to a dedicated workstation for post-processing, which included multiplanar  
53  
54  
55  
56  
57

1  
2  
3 reconstructions (MPR), maximum intensity projections (MIP) and volume rendering images  
4 (VRT).  
5

### 6 ***Coronary artery analysis***

7  
8 All CCTA images were assessed by an experienced radiologist who was blinded to the study  
9 (LE.P.). CACS was calculated using a semi-automatically software, according to the Agatston  
10 method. Plaque composition was classified as: calcified, non-calcified or mixed, with coronary  
11 calcified plaque being defined as any structure with a density  $\geq 130$  HU.  
12  
13

14  
15 Coronary atherosclerotic lesions were quantified for stenosis by visual estimation. We evaluated  
16 only the coronary segments with a diameter greater than 1.5 mm.  
17

18  
19 Every patient received a final CAD-RADS score based on the extent of coronary stenosis  
20 (Figure 1). CAD-RADS score of 0 was assigned if there was total absence of coronary plaques or  
21 stenosis. Minimal coronary stenosis between 1-24% was considered CAD-RADS 1. CAD-RADS  
22 score 2 was given when there was a mild stenosis between 25-49%. CAD-RADS score of 3  
23 corresponded to a moderate stenosis between 50-69%. CAD-RADS score of 4 was assigned if  
24 there was a single coronary stenosis between 70-99% or if the left main artery was depicted with  
25 a stenosis of more than 50%. Also, CAD-RADS score of 4 was given in the situation of 3-vessel  
26 obstructive disease, when there were stenosis of more than 70% involving all the three coronary  
27 arteries (left anterior descending artery, circumflex artery and right coronary artery). If total  
28 occlusion was identified in at least one coronary segment, a CAD-RADS score of 5 was assigned.  
29  
30  
31

32  
33 Obstructive CAD was defined as  $\geq 50\%$  stenosis of  $\geq 1$  coronary segments on CCTA.  
34

### 35 ***Cardiovascular risk factors***

36  
37 Prior to CCTA, a detailed medical history with the risk factors was obtained from all patients.  
38 Hypertension was defined as blood pressure  $\geq 140/90$  mm Hg or treatment with antihypertensive  
39 medications (20). Dyslipidemia was defined as a total cholesterol level  $\geq 5$  mmol/L (21) or  
40 treatment with lipid-lowering medications. Diabetes mellitus was defined as fasting plasma  
41 glucose  $\geq 126$  mg/dl or the use of insulin or oral antidiabetic agents. Obesity was defined as body  
42 mass index (BMI)  $\geq 30$  kg/m<sup>2</sup>. Self-reported smoking status was obtained by a query regarding  
43 both current and previous smoking history. Classification of symptoms (typical angina, atypical  
44 angina, non-anginal pain) was judged by cardiologists in patient interviews conducted prior to the  
45 CT examination.  
46  
47  
48

### 49 ***Statistical analysis***

50  
51 Categorical variables were presented as numbers and percentages. Continuous variables with  
52 normal distribution were expressed as means  $\pm$  standard deviation, those with non-normal  
53 distribution as median with interquartile range. Normality was tested with the Kolmogorov-  
54 Smirnov test.  
55  
56  
57

1  
2  
3 Differences between CAD-RADS groups were evaluated using one-way analysis of variance  
4 (ANOVA) for continuous variables and  $\chi^2$  test for categorical variables. Whenever the  
5 distribution of continuous data was not normal, non-parametric Kruskal-Wallis test was used for  
6 comparison.  
7  
8

9 Cardiovascular risk factors that showed a significant association with the CAD-RADS score were  
10 included in multivariable logistic regression analysis in order to evaluate their simultaneous  
11 influence. Through logistic regression analysis, independent predictors for obstructive CAD  
12 (CAD-RADS score  $\geq 3$ ) were identified.  
13  
14

15 For all comparisons, a p value of  $<0.05$  was considered statistically significant. The statistical  
16 analysis was performed using commercially available software (MedCalc for Windows, version  
17 14.8, MedCalc Software, Ostend, Belgium).  
18  
19

### 20 ***Patient and Public Involvement***

21 There was no involvement of patients and/or public in this study.  
22  
23

## 24 **Results**

### 25 ***Baseline characteristics of the study population***

26  
27 The clinical and angiographic characteristics of our study population according to the CAD-  
28 RADS classification are shown in Table 1. Among the 475 patients included in this study, the  
29 mean age was  $57.8 \pm 13.2$  years and the majority of them were females: 54.4%. There was a high  
30 prevalence of both hypertensive (74.5%) and dyslipidemic (69.7%) patients. The percentage of  
31 diabetic patients was relatively small, with only 19.3% individuals having this condition.  
32 Smoking was reported among 46.3% of the study group. The majority of the patients were  
33 symptomatic, 72.6 % presenting with either typical or atypical angina.  
34  
35  
36  
37  
38

39 When we classified the patients according to the CAD-RADS score, 177 of them had CAD-  
40 RADS score=0, 99 patients had CAD-RADS score=1 while 80 patients CAD-RADS score=2. A  
41 percentage of 14.1% of people included in this study were diagnosed with CAD-RADS 3 score.  
42 Finally, 9.3% patients had severe stenosis, with a CAD-RADS score of 4 and 8 patients had total  
43 occlusion of a coronary segment (CAD-RADS score=5).  
44  
45

46 Patient gender, age, the presence of hypertension, dyslipidemia, diabetes mellitus as well as  
47 clinical presentation and coronary artery calcium score were significantly different across CAD-  
48 RADS scores ( $p < 0.0001$  for all comparisons) (Table 1). However, our result did not reveal any  
49 association between obesity and different CAD-RADS scores ( $p=0.63$ ) (Table 1).  
50  
51  
52  
53  
54  
55  
56  
57  
58  
59  
60

### ***CAD-RADS score and multiple cardiovascular risk factors***

Using the cardiovascular risk factors mentioned above, we tested if there is any association regarding their presence and obstructive coronary artery disease, defined as coronary stenosis  $\geq 50\%$  and equivalent with a CAD-RADS score  $\geq 3$  (Table 2).

Our results show that a CAD-RADS score between 0-2 was more frequent in younger patients, with a mean age of 55.41 years in this subgroup, while patients older than 63-years old were more likely to develop obstructive coronary stenosis. Regarding the gender, patients with CAD-RADS scores higher than 3 were more frequently males. The majority of the female patients (82.9%) received a CAD-RADS score of 0, 1 or 2 (Table 2).

Our findings indicated a positive association between systolic hypertension and CAD-RADS score, with over 90% of the patients with moderate/severe stenosis (CAD-RADS  $\geq 3$ ) being hypertensive (Table 2). Moreover, based on our results, patients with CAD-RADS scores  $\geq 3$  had a greater frequency of dyslipidemia, with more than 85% patients in these categories being also dyslipidemic (Table 2).

Furthermore, the proportion of smokers was larger among patients identified with higher CAD-RADS scores: almost two-third of the patients who received a CAD-RADS score  $\geq 3$  admitted the use of cigarettes (Table 2). On the other hand, in the CAD-RADS groups of 0, 1 and 2 the percentage of the smokers was less than 50% (Table 2).

Regarding the association between diabetes mellitus and CAD-RADS score, our results show increasing percents of diabetic individuals proportional with higher CAD-RADS scores: from 16.3% diabetic patients with CAD-RADS scores of 0-2 to 28.6% diabetic patients with CAD-RADS scores  $\geq 3$  (Table 2). However, the percentage of obese patients did not differ significantly among different CAD-RADS groups (Table 2).

### ***Multivariable analysis***

According to the multivariable analysis, male sex, age, hypertension, dyslipidemia and smoking remained major predictors of obstructive CAD defined as CAD-RADS score  $\geq 3$  (Table 3). Males had more than 3 times higher odds of developing significant coronary stenosis. The odds ratio for coronary stenosis  $\geq 50\%$  was approximately 3.5-fold greater in hypertensive individuals. Our results showed that having dyslipidemia significantly increased the odds of moderate/severe coronary stenosis by more than 2.5 times. Last but not least, smoking was associated with increased odds of having CAD-RADS score  $\geq 3$  by approximately 2 times.

## **Discussion**

Romania is one of the high cardiovascular risk European countries according to data from the last European Society of Cardiology guideline for prevention of CVD (3). There are only a limited number of national epidemiological studies which estimate the prevalence and future trends of

1  
2  
3 cardiovascular risk factors in the Romanian population. (22-26). The latest study from 2017,  
4 Sephar III, shows an increasing trend regarding the majority of cardiovascular risk factors in our  
5 population (24). The prevalence of hypertension increased from 40.4% in 2011 to 45.1% in 2016  
6 (23, 24). Moreover, the percentage of Romanians diagnosed with dyslipidemia is alarmingly  
7 high, reaching 77.3% in 2016, with 53.4% newly diagnosed cases (24). Furthermore, the  
8 prevalence of diabetes mellitus, another important risk factor for coronary artery disease, is  
9 12.4% (25), a relatively high percentage that puts Romania on the 8th place in Europe regarding  
10 this medical condition (27). Overweight and obesity represent another medical issue encountered  
11 in our country. Both PREDATORR and Sephar III studies (24, 26) reported a prevalence of over  
12 30% of obese patients based on BMI index, similar to the data from WHO database which shows  
13 an increasing trend of obesity in our country over the last 40 years (28). Last but not least,  
14 smoking can be considered another cause for the high incidence of cardiovascular disease in our  
15 country. Even if there is a decreasing trend regarding this habit in our country, Romania still  
16 occupies one of the leading places in European Union, with 28% of individuals reporting the use  
17 of cigarettes, a number higher than the average European percentage: 26% (29). According to the  
18 data by the National Institute for Public Health in Romania, tobacco is attributed to 16.3% CVD-  
19 Related deaths in Romania. (30).  
20  
21  
22  
23

24 In Europe, Romania records one of the greatest incidences of cardiovascular diseases, according  
25 to the latest statistics offered by EuroStat in 2018 (31). Our country occupies the second place in  
26 Europe regarding the percent of total deaths caused by diseases of the circulatory system (31).  
27 Concerning the standardized death rates caused by ischemic heart disease, Romania is also one of  
28 the leading countries, being on the 6th and 5th place in deaths of men and women respectively  
29 (31).  
30

31 CAD-RADS is standardized radiological reporting system dating since 2016 and there are only a  
32 few studies published in the area of cardiac imaging using the CAD-RADS score (32-36). It is  
33 used to quantify coronary artery stenosis in patients with suspected or known coronary artery  
34 disease in order to provide a basis for further investigation, diagnosis, management and  
35 treatment, substantially reducing human error and improving data integrity (19).  
36  
37  
38

39 To the best of our knowledge, our study is the first one to evaluate the association between  
40 multiple associations of cardiovascular risk factors and the severity of coronary artery disease  
41 assessed on CCTA and evaluated using CAD-RADS classification in the Romanian population.  
42

43 The association between cardiovascular risk factors and cardiovascular events was first  
44 demonstrated by the Framingham study through an epidemiological approach (37). The  
45 INTERHEART study showed that the cumulative effect of risk factors increased the risk of CAD,  
46 especially of myocardial infarction worldwide, in both sexes and all ages worldwide (38).  
47  
48

49 Our research reports that male sex, age, dyslipidemia, hypertension and smoking are the  
50 significant predictors of obstructive CAD defined as CAD-RADS score  $\geq 3$ , with the prevalence  
51 being increased by a cumulative effect on them.  
52

53 Male sex and age are well-known risk factors for coronary atherosclerosis, being used in  
54 prediction models for the estimation of pretest probability of developing coronary artery disease  
55 (39, 40). Among medical risk factors, our study showed that hypertension and dyslipidemia were  
56  
57

1  
2  
3 positively associated with CAD-RADS score  $\geq 3$  in both univariate and multivariable analyses.  
4 Our results are in concordance with the latest data from European Heart Network which shows  
5 that systolic blood pressure and total cholesterol levels are the determinants with the greatest  
6 contribution to CVD mortality (41). Also, these two factors are included in the widely used  
7 SCORE charts (3) and there are many clinical models that add them for increasing the probability  
8 of obstructive CAD (42-45).  
9

10  
11 However, we did not find a direct association between obesity and coronary artery burden  
12 defined by CAD-RADS score. Our study is in concordance with Medakovic et al (46) and Dores  
13 H et al (47). According to Dores H et al, obesity assessed by BMI can be an indicator of the  
14 presence of CAD, but not necessarily associated with its severity (47). They also described an  
15 “obesity paradox” with better outcomes after percutaneous coronary interventions at patients with  
16 a higher BMI (47). Also, our multivariable analysis did not find an association between  
17 diabetes mellitus and obstructive CAD, one possible explanation being that only 19.3% of our  
18 study group had diabetes as their comorbidity.  
19  
20

21 Finally, our findings show that smoking is an independent risk factor for the presence of  
22 obstructive coronary disease, this being also one of the behavioral factors with the highest  
23 contribution for CVD mortality and morbidity rates across Europe (41).  
24  
25

## 26 **Limitations of the study**

27  
28  
29 Our study has several limitations, the most important one being the fact that it is a retrospectively  
30 conducted one. Secondary, our results were confined to the experience of a single medical center  
31 and the findings of this study were based on a relatively small patient population. Regarding the  
32 risk factors, dyslipidemia was not analyzed by fractions of the cholesterol: LDL-C and HDL-C.  
33 Also, we did not analyze other additional risk factors like alcohol use, physical activity,  
34 anthropometric measurements or C-reactive protein levels. Taking the retrospective approach into  
35 consideration, our research assess only the association between traditionally known cardiovascular  
36 risk factors and coronary stenosis evaluated by CAD-RADS score and does not assess the  
37 incidence of major cardiac events after performing the CT angiography.  
38  
39  
40

## 41 **Conclusion**

42  
43  
44 In conclusion, our study demonstrates that there is a significant association between multiple  
45 cardiovascular risk factors and a higher coronary atherosclerotic burden assessed using CAD-  
46 RADS score in the Romanian population. Considering CAD as a priority for Romanian  
47 healthcare system, our study provides an overview of imaging and clinical characteristics of CAD  
48 and their association, offering valuable information for both cardiologists and radiologists in  
49 order to improve the management of the patients.  
50  
51  
52  
53  
54  
55  
56  
57



### Author contributions:

- Conception (constructing the idea for research): Loredana E. Popa, Mircea M. Buruian
- Design (planning methodology to reach the conclusion): Loredana E. Popa, Diana Feier, Andrei Lebovici, Raluca Rancea
- Supervision (organising and supervising the course of the project): Loredana E. Popa, Mircea M. Buruian, Adrian Molnar
- Data Collection and Processing: Raluca Rancea, Calin Schiau, Cristina Catana, Claudia G. Moldovanu, Bianca Petresc
- Analysis and interpretation: Bianca Petresc, Diana Feier
- Literature Review: Bianca Petresc, Calin Schiau, Cristina Catana, Claudia G. Moldovanu
- Writing of the manuscript: Loredana E. Popa, Bianca Petresc, Cristina Catana, Claudia G. Moldovanu
- Critical Review: Adrian Molnar, Andrei Lebovici, Diana Feier, Mircea M. Buruian

**Acknowledgements:** None.

**Funding:** This research received no specific grant from any funding agency in the public, commercial or not-for-profit sectors.

**Competing interest:** None declared.

**Ethics approval:** The study was approved by the Ethics Committees of University of Medicine and Pharmacy “Iuliu Hatieganu” Cluj-Napoca (455/19.12.2018) and University of Medicine and Pharmacy Targu Mures (272/21.11.2018). Institutional review board approval was obtained for this study (1339/25.09.2018).

**Patient consent for publication:** Not required.

**Data sharing statement:** Deidentified participant data are available upon request through the corresponding author BP. ORCID identifier 0000-0003-2167-9350.

### References

1. Timmis A, Townsend N, Gale C, Grobbee R, Maniadakis N, Flather M, et al. European society of cardiology: cardiovascular disease statistics 2017. *Eur Heart J.* 2018; 39:508–79.
2. Moran AE, Forouzanfar MH, Roth GA, Mensah GA, Ezzati M, Murray CJ, Naghavi M. Temporal trends in ischemic heart disease mortality in 21 world regions, 1980 to 2010: the Global Burden of Disease 2010 study. *Circulation* 2014 129(14):1483-92.
3. Piepoli MF, Hoes AW, Agewall S, Albus C, Brotons C, Catapano A, et al. 2016 European Guidelines on cardiovascular disease prevention in clinical practice: The Sixth Joint Task Force of the European Society of Cardiology and Other Societies on Cardiovascular Disease Prevention in Clinical Practice (constituted by representatives of 10 societies and by invited experts) Developed with the special contribution of the European Association

- 1  
2  
3 for Cardiovascular Prevention & Rehabilitation (EACPR). *Eur Heart J.* 2016;  
4 37(29):2315-81.  
5  
6 4. Rivera JJ, Nasir K, Cox PR, Choi EK, Yoon Y, Cho I, et al. Association of traditional  
7 cardiovascular risk factors with coronary plaque sub-types assessed by 64-slice computed  
8 tomography angiography in a large cohort of asymptomatic subjects. *Atherosclerosis*  
9 2009;206:451–57.  
10  
11 5. Rapsomaniki E, Timmis A, George J, Pujades-Rodriguez M, Shah AD, Denaxas S, et al.  
12 Blood pressure and incidence of twelve cardiovascular diseases: lifetime risks, healthy  
13 life-years lost, and age-specific associations in 1.25 million people. *Lancet*  
14 2014;383(9932):1899-1911.  
15  
16 6. Pekkanen J, Linn S, Heiss G, Suchindran CM, Leon A, Rifkind BM, Tyroler HA. Ten-  
17 year mortality from cardiovascular disease in relation to cholesterol level among men  
18 with and without preexisting cardiovascular disease. *N Eng J Med.* 1990;322:1700–07.  
19  
20 7. Greenland P, Knoll MD, Stamler J, Neaton JD, Dyer AR, Garside DB, et al. Major Risk  
21 Factors as Antecedents of Fatal and Nonfatal Coronary Heart Disease Events. *JAMA*  
22 2003;290(7):891–7.  
23  
24 8. Canto JG, Kiefe CI, Rogers WJ, Peterson ED, Frederick PD, French WJ, et al. Number of  
25 coronary heart disease risk factors and mortality in patients with first myocardial  
26 infarction. *JAMA* 2011;306(19):2120-7.  
27  
28 9. Kronmal RA, McClelland RL, Detrano R, Shea S, Lima JA, Cushman M, et al. Risk  
29 factors for the progression of coronary artery calcification in asymptomatic subjects:  
30 results from the Multi-Ethnic Study of Atherosclerosis (MESA). *Circulation* 2007;  
31 115:2722–30.  
32  
33 10. D’Agostino RB Sr, Vasan RS, Pencina MJ, Wolf PA, Cobain M, Massaro JM, et al.  
34 General cardiovascular risk profile for use in primary care: the Framingham Heart Study.  
35 *Circulation* 2008; 117:743 –53.  
36  
37 11. Conroy RM, Pyorala K, Fitzgerald AP, Sans S, Menotti A, De Baker S, et al. Estimation  
38 of ten-year risk of fatal cardiovascular disease in Europe: the SCORE project. *Eur Heart J.*  
39 2003; 24:987 –1003.  
40  
41 12. Mangla A, Oliveros E, Williams KA Sr, Kalra DK. Cardiac imaging in the diagnosis of  
42 coronary artery disease. *Curr Probl Cardiol.* 2017;42:316–66.  
43  
44 13. Montalescot G, Sechtem U, Achenbach S, Andreotti F, Arden C, Budaj A et al. 2013 ESC  
45 guidelines on the management of stable coronary artery disease: The task force on the  
46 management of stable coronary artery disease of the European Society of Cardiology. *Eur*  
47 *Heart J.* 2013;34:2949-3003.  
48  
49 14. Hadamitzky M, Taubert S, Deseive S, Byrne RA, Martinoff S, Schömig A, et al.  
50 Prognostic value of coronary computed tomography angiography during 5 years of  
51 follow-up in patients with suspected coronary artery disease. *Eur Heart J.* 2013;34:3277–  
52 85.  
53  
54  
55  
56  
57  
58  
59  
60

15. Nadjiri J, Hausleiter J, Jahnichen C, Will A, Hendrich E, Martinoff S, et al. Incremental prognostic value of quantitative plaque assessment in coronary CT angiography during 5 years of follow up. *J Cardiovasc Comput Tomogr*. 2016;10:97–104.
16. Blanke P, Naoum C, Ahmadi A, Cheruvu C, Soon J, Arepalli C, et al. Long-term prognostic utility of coronary CT angiography in stable patients with diabetes mellitus. *JACC Cardiovasc Imaging* 2016;9:1280–8.
17. Deseive S, Shaw LJ, Min JK, Achenbach S, Andreini D, Al-Mallah MJ, et al. Improved 5-year prediction of all cause mortality by coronary CT angiography applying the confirm score. *Eur Heart J Cardiovasc Imaging* 2017;18:286–93.
18. Andreini D, Pontone G, Mushtaq S, Gransar H, Conte E, Bartorelli AL, et al. Long-term prognostic impact of CT-Leaman score in patients with non-obstructive CAD: results from the coronary CT angiography evaluation for Clinical Outcomes International Multicenter (CONFIRM) study. *Int J Cardiol*. 2017;231:18–25.
19. Cury RC, Abbara S, Achenbach S, Agatston A, Berman DS, Budoff MJ et al. CAD-RADS(tm) coronary artery disease—reporting and data system. An expert consensus document of the society of cardiovascular computed tomography (SCCT), the American College of Radiology (ACR) and the North American Society for Cardiovascular Imaging (NASCI). Endorsed by the American College of Cardiology. *J Cardiovasc Comput Tomogr*. 2016;10:269–81.
20. Williams B, Mancia G, Spiering W, Agabiti Rosei E, Azizi M, Burnier M, et al. 2018 ESC/ESH guidelines for the management of arterial hypertension [published correction appears in *Eur Heart J*. 2019;40:475]. *Eur Heart J*. 2018; 39:3021–104.
21. [http://www.heartscore.org/en\\_GB/](http://www.heartscore.org/en_GB/)
22. Dorobantu M, Darabont RO, Badila E, Ghiorghe S. Prevalence, Awareness, Treatment, and Control of Hypertension in Romania: Results of the SEPHAR Study. *Int J Hypertens*. 2010 Feb 1;2010:970694
23. Dorobanțu M, Darabont R, Ghiorghe S, Babes K, Pop D, Toma D, Vet al. Profile of the Romanian hypertensive patient data from SEPHAR II study. *Rom J Intern Med*. 2012 Oct-Dec;50(4):285-96
24. Dorobantu M, Tautu OF, Dimulescu D, Sinescu C, Gusbeth-Tatomir P, Arsenescu-Georgescu C, et al. Perspectives on hypertension's prevalence, treatment and control in a high cardiovascular risk East European country: data from the SEPHAR III survey. *J Hypertens*. 2018 Mar;36(3):690-700.
25. Mota M, Popa SG, Mota E, Mitrea A, Catrinoiu D, Cheta DM, et al. Prevalence of diabetes mellitus and prediabetes in the adult Romanian population: PREDATORR study. *J Diabetes*. 2016 May;8(3):336-44.
26. Popa S, Moța M, Popa A, Moța E, Serafinceanu C, Guja C, et al Prevalence of overweight/obesity, abdominal obesity and metabolic syndrome and atypical cardiometabolic phenotypes in the adult Romanian population: PREDATORR study. *J Endocrinol Invest*. 2016 Sep;39(9):1045-53.

- 1
- 2
- 3 27. International Diabetes Federation. IDF Diabetes Atlas, 8th edn. Brussels, Belgium.
- 4 International Diabetes Federation, 2017. <http://www.diabetesatlas.org>
- 5
- 6 28. [http://gamapserver.who.int/gho/interactive\\_charts/ncd/risk\\_factors/obesity/atlas.html](http://gamapserver.who.int/gho/interactive_charts/ncd/risk_factors/obesity/atlas.html)
- 7
- 8 29. <http://ec.europa.eu/commfrontoffice/publicopinion/index.cfm/Survey/getSurveyDetail/instruments/SPECIAL/surveyKy/2146>
- 9
- 10 30. Simionescu M, Bilan S, Gavurova B, Bordea EN. Health Policies in Romania to Reduce
- 11 the Mortality Caused by Cardiovascular Diseases. *Int J Environ Res Public Health*.
- 12 2019;16(17):3080. Published 2019 Aug 24. doi:10.3390/ijerph16173080
- 13
- 14 31. [https://ec.europa.eu/eurostat/statistics-](https://ec.europa.eu/eurostat/statistics-explained/index.php/Cardiovascular_diseases_statistics)
- 15 [explained/index.php/Cardiovascular\\_diseases\\_statistics](https://ec.europa.eu/eurostat/statistics-explained/index.php/Cardiovascular_diseases_statistics)
- 16
- 17 32. Xie JX, Cury RC, Leipsic J, Crim MT, Berman DS, Gransar H et al. The Coronary Artery
- 18 Disease-Reporting and Data System (CAD-RADS): Prognostic and Clinical Implications
- 19 Associated With Standardized Coronary Computed Tomography Angiography Reporting.
- 20 *JACC Cardiovasc Imaging*. 2018 Jan;11(1):78-89.
- 21
- 22 33. Williams MC, Moss A, Dweck M, Hunter A, Pawade T, Adamson PD, et al. Standardized
- 23 reporting systems for computed tomography coronary angiography and calcium scoring:
- 24 A real-world validation of CAD-RADS and CAC-DRS in patients with stable chest pain.
- 25 *J Cardiovasc Comput Tomogr*. 2019 Jul 26;. doi: 10.1016/j.jcct.2019.07.010. [Epub ahead
- 26 of print].
- 27
- 28 34. Rodriguez-Granillo GA, Carrascosa P, Goldsmit A, Arbab-Zadeh A. Invasive coronary
- 29 angiography findings across the CAD-RADS classification spectrum. *Int J Cardiovasc*
- 30 *Imaging*. 2019 Nov;35(11):1955-61.
- 31
- 32 35. van Rosendaal AR, Shaw LJ, Xie JX, Dimitriu-Leen AC, Smit JM, Scholte AJ, et al.
- 33 Superior Risk Stratification With Coronary Computed Tomography Angiography Using a
- 34 Comprehensive Atherosclerotic Risk Score. *JACC Cardiovasc Imaging*. 2019
- 35 Oct;12(10):1987-97.
- 36
- 37 36. Szilveszter B, Kolossváry M, Karády J, Jermendy ÁL, Károlyi M, Panajotu A, et al.
- 38 Structured reporting platform improves CAD-RADS assessment. *J Cardiovasc Comput*
- 39 *Tomogr*. 2017 Nov;11(6):449-54.
- 40
- 41 37. Dawber TR, Meadors GF, Moore FE. Epidemiological Approaches to Heart Disease: The
- 42 Framingham Study. *Am J Public Health Nations Health* 1951;41(3):279–86.
- 43
- 44 38. Yusuf S, Hawken S, Ounpuu S, Dans T, Avezum A, Lanas F, et al. Effects of potentially
- 45 modifiable risk factors associated with myocardial infarction in 52 countries (the
- 46 INTERHEART study): case–control study. *Lancet* 2004;364:937–52.
- 47
- 48 39. Genders TS, Steyerberg EW, Alkadhi H, Leschka S, Desbiolles L, Nieman K, et al . A
- 49 clinical prediction rule for the diagnosis of coronary artery disease: validation, updating,
- 50 and extension. *Eur Heart J* 2011;32:1316- 30.
- 51
- 52 40. Knuuti J, Wijns W, Saraste A, Capodanno D, Barbato E, Funck-Brentano C, et al. 2019
- 53 ESC Guidelines for the diagnosis and management of chronic coronary syndromes. *Eur*
- 54 *Heart J*. 2019 Aug 31;. doi: 10.1093/eurheartj/ehz425. [Epub ahead of print]
- 55
- 56 41. <http://www.ehnheart.org/images/CVD-statistics-report-August-2017.pdf>
- 57

- 1  
2  
3 42. Genders TS, Steyerberg EW, Hunink MG, Nieman K, Galema TW, Mollet NR, et al.  
4 Prediction model to estimate presence of coronary artery disease: retrospective pooled  
5 analysis of existing cohorts. *s. BMJ* 2012;344:e3485.  
6  
7 43. Reeh J, Thering CB, Heitmann M, Hojberg S, Sorum C, Bech J, et al. Prediction of  
8 obstructive coronary artery disease and prognosis in patients with suspected stable angina.  
9 *Eur Heart J* 2018;40:1426-35.  
10  
11 44. Versteyslen MO, Joosen IA, Shaw LJ, Narula J, Hofstra L. Comparison of Framingham,  
12 PROCAM, SCORE, and Diamond Forrester to predict coronary atherosclerosis and  
13 cardiovascular events. *J Nucl Cardiol* 2011;18:904-911.  
14  
15 45. Jensen JM, Voss M, Hansen VB, Andersen LK, Johansen PB, Munkholm H, Norgaard  
16 BL. Risk stratification of patients suspected of coronary artery disease: comparison of five  
17 different models. *Atherosclerosis* 2012;220:557-562  
18  
19 46. Medakovic P, Biloglav Z, Padjen I, Pristas I, Jukic M, Zuvella F, et al. Quantification of  
20 coronary atherosclerotic burden with coronary computed tomography angiography:  
21 adapted Leaman score in Croatian patients. *Int J Cardiovasc Imaging* 2018; 34(10):1647-  
22 55.  
23  
24 47. Dores H, de Araújo Gonçalves P, Carvalho MS, Sousa PJ, Ferreira A, Cardim N, et al.  
25 Body mass index as a predictor of the presence but not the severity of coronary artery  
26 disease evaluated by cardiac computed tomography. *Eur J Prev Cardiol.* 2014;  
27 21(11):1387-93.  
28  
29  
30  
31

## 32 **FIGURE LEGENDS**

33  
34 Fig. 1- MPR (multiplanar reconstruction) images showing different degrees of coronary artery  
35 stenosis (yellow arrows): a. normal RCA without any plaque or stenosis (CAD-RADS 0), b.  
36 small calcified plaque in the proximal LAD with minimal luminal narrowing < 25% (CAD-  
37 RADS 1), c. calcified plaque in the proximal LAD with 25-49% diameter stenosis (CAD-RADS  
38 2), d. semi-circumferential calcified plaque in the proximal LAD with 50-69% diameter stenosis  
39 (CAD-RADS 3), e. non-calcified plaque in the proximal RCA with 70-99% diameter stenosis  
40 (CAD-RADS 4), f. total occlusion of proximal and mid LAD; calcified plaques above and  
41 beyond it supports the diagnosis of chronic total occlusion (CAD-RADS 5)  
42  
43  
44  
45  
46  
47  
48  
49  
50  
51  
52  
53  
54  
55  
56  
57  
58  
59  
60

**Table 1. Baseline characteristics of the study population according to CAD-RADS categories**

| Variable              | Value                               | CAD-RADS 0<br>(n=177) | CAD-RADS 1<br>(n=99) | CAD-RADS 2<br>(n=80) | CAD-RADS 3<br>(n=67) | CAD-RADS 4<br>(n=67) | CAD-RADS 5<br>(n=8) | p value  |
|-----------------------|-------------------------------------|-----------------------|----------------------|----------------------|----------------------|----------------------|---------------------|----------|
| Age                   |                                     | 48.8 ± 12.1           | 60.4 ± 11.9          | 63.6 ± 8.7           | 64.6 ± 10.5          | 66.1 ± 10.6          | 64.7 ± 11.1         | p<0.001* |
| Sex                   |                                     |                       |                      |                      |                      |                      |                     | p<0.001* |
|                       | Male (n=217)                        | 55 (31.1%)            | 42 (42.4%)           | 45 (56.2%)           | 39 (58.2%)           | 28 (63.6%)           | 8 (100%)            |          |
|                       | Female(n=258)                       | 122 (68.9%)           | 57 (57.6%)           | 35 (43.8%)           | 28 (41.8 %)          | 16 (36.4%)           | 0 (0 %)             |          |
| Hypertension          |                                     |                       |                      |                      |                      |                      |                     | p<0.001* |
|                       | Yes(n=354)                          | 110 (62.2%)           | 70 (70.7%)           | 62 (77.5%)           | 63 (94.0%)           | 42 (95.4%)           | 7 (87.5%)           |          |
|                       | No (n=121)                          | 67(37.8%)             | 29 (29.3%)           | 18 (22.5%)           | 4 (6.0%)             | 2 (4.6%)             | 1 (12.5%)           |          |
| Dyslipidemia          |                                     |                       |                      |                      |                      |                      |                     | p<0.001* |
|                       | Yes (n=331)                         | 91 (51.4%)            | 72 (72.7%)           | 61 (76.3%)           | 59 (88.1%)           | 41 (93.2%)           | 7 (87.5%)           |          |
|                       | No (n=144)                          | 86 (48.6%)            | 27 (27.3%)           | 19 (23.8%)           | 8 (11.9%)            | 3(6.8%)              | 1 (12.5%)           |          |
| Diabetes mellitus     |                                     |                       |                      |                      |                      |                      |                     | p<0.001* |
|                       | Yes (n=92)                          | 16 (9.0%)             | 21(21.2%)            | 21(26.2%)            | 12 (17.9%)           | 18 (40.9%)           | 4 (50.0%)           |          |
|                       | No (n=383)                          | 161 (91.0%)           | 78 (78.8%)           | 59 (73.8%)           | 55 (82.1%)           | 26 (59.1%)           | 4 (50.0%)           |          |
| Obesity               |                                     |                       |                      |                      |                      |                      |                     | p=0.63   |
|                       | Yes (n=274)                         | 68 (38.4%)            | 45 (45.4%)           | 38 (47.5%)           | 29 (43.2%)           | 19 (43.1%)           | 2 (25.0%)           |          |
|                       | No (n=201)                          | 109 (61.6%)           | 54 (54.6%)           | 42 (52.5%)           | 38 (56.8%)           | 25 (56.9%)           | 6 (75.0%)           |          |
| Smoking               |                                     |                       |                      |                      |                      |                      |                     | p<0.001* |
|                       | Yes (n=220)                         | 53 (30.0%)            | 44 (44.4%)           | 48 (60.0%)           | 44 (65.6%)           | 25 (56.9%)           | 6 (75.0%)           |          |
|                       | No (n=255)                          | 124 (70.0%)           | 55 (55.6%)           | 32 (40.0%)           | 23 (34.4%)           | 19 (43.1%)           | 2 (25.0%)           |          |
| Clinical presentation |                                     |                       |                      |                      |                      |                      |                     | p<0.001* |
|                       | Typical angina<br>(n=222)           | 60 (33.9%)            | 35 (35.3%)           | 36 (45.0%)           | 45 (67.1%)           | 39 (88.6%)           | 7 (87.5%)           |          |
|                       | Atypica angina<br>(n=123)           | 70 (39.5%)            | 25 (25.2%)           | 20 (25.0%)           | 7 (10.4%)            | 1 (2.2%)             | 0 (0 %)             |          |
|                       | Nonanginal<br>chest pain<br>(n=130) | 47 (26.6%)            | 39 (39.5%)           | 24 (30.0%)           | 15 (22.5%)           | 4 (9.2%)             | 1 (12.5%)           |          |
| CACS                  |                                     | 0                     | 15                   | 123                  | 303                  | 711.3                | 1611.4              | p<0.001* |
|                       |                                     | [0-0]                 | [6.2-36.6]           | [55.1-284.5]         | [134.8-500.7]        | [444.7-<br>958.3]    | [949.1-<br>1921.4]  |          |

\*Statistically significant p<0.05

Results are presented as mean±SD, number (%), or median (25th-75th percentile)

Abbreviations: CACS: coronary artery calcium score

**Table 2. Univariate analysis for the association between cardiovascular risk factors and obstructive CAD classified using CAD-RADS categories**

| Variable          | Value  | CAD-RADS score 0-2 (stenosis<50%) | CAD-RADS score 3-5 (stenosis≥50%) | p value  |
|-------------------|--------|-----------------------------------|-----------------------------------|----------|
| Age               |        | 55.41 ± 13.11                     | 63.10 ± 10.55                     | p<0.001* |
| Sex               |        |                                   |                                   | p<0.001* |
|                   | Male   | 142 (39.2%)                       | 75 (63.0%)                        |          |
|                   | Female | 214 (60.1%)                       | 44 (37.0%)                        |          |
| Hypertension      |        |                                   |                                   | p<0.001* |
|                   | Yes    | 242 (68.0%)                       | 112 (94.1%)                       |          |
|                   | No     | 114 (32.0%)                       | 7 (5.9%)                          |          |
| Dyslipidemia      |        |                                   |                                   | p<0.001* |
|                   | Yes    | 224 (62.9%)                       | 107 (89.9%)                       |          |
|                   | No     | 132 (37.01%)                      | 12 (10.1%)                        |          |
| Diabetes mellitus |        |                                   |                                   | p=0.003* |
|                   | Yes    | 58 (16.3%)                        | 34(28.6%)                         |          |
|                   | No     | 298 (83.7%)                       | 85 (71.4%)                        |          |
| Obesity           |        |                                   |                                   | p=0.93   |
|                   | Yes    | 151 (42.4%)                       | 50 (42.0%)                        |          |
|                   | No     | 205 (57.6%)                       | 69 (58.0%)                        |          |
| Smoking           |        |                                   |                                   | p<0.001* |
|                   | Yes    | 145 (40.7%)                       | 75 (63.0%)                        |          |
|                   | No     | 211 (59.3%)                       | 44 (37.0%)                        |          |
| CACS              |        | 0.4 [0 - 39.5]                    | 433.0 [182.4 - 924.8]             | p<0.001* |

\*Statistically significant p<0.05

Results are presented as mean±SD, number (%) or median [25th-75th percentile]

Abbreviations: CACS: coronary artery calcium score

**Table 3. Logistic regression analysis for the association between cardiovascular risk factors and obstructive CAD (CAD-RADS score ≥3)**

| Variable          | Odds ratio (95% CI)    | p value |
|-------------------|------------------------|---------|
| Male sex          | 3.136 (1.841 – 5.341)  | <0.001* |
| Age               | 1.063 (1.036 – 1.090)  | <0.001* |
| Hypertension      | 3.493 (1.444 – 6.251)  | 0.006*  |
| Dyslipidemia      | 2.648 (1.283 – 5.466)  | 0.008*  |
| Diabetes mellitus | 1.207 (0.698 – 2.088)  | 0.501   |
| Smoking           | 2.112 (1.236 – 5.466 ) | 0.006*  |

\*Statistically significant p<0.05



Fig. 1- MPR (multiplanar reconstruction) images showing different degrees of coronary artery stenosis (yellow arrows): a. normal RCA without any plaque or stenosis (CAD-RADS 0), b. small calcified plaque in the proximal LAD with minimal luminal narrowing < 25% (CAD-RADS 1), c. calcified plaque in the proximal LAD with 25-49% diameter stenosis (CAD-RADS 2), d. semi-circumferential calcified plaque in the proximal LAD with 50-69% diameter stenosis (CAD-RADS 3), e. non-calcified plaque in the proximal RCA with 70-99% diameter stenosis (CAD-RADS 4), f. total occlusion of proximal and mid LAD; calcified plaques above and beyond it supports the diagnosis of chronic total occlusion (CAD-RADS 5)

173x122mm (600 x 600 DPI)



**STROBE 2007 (v4) Statement—Checklist of items that should be included in reports of *cross-sectional studies***

| Section/Topic                | Item # | Recommendation                                                                                                                                                                       | Reported on page # |
|------------------------------|--------|--------------------------------------------------------------------------------------------------------------------------------------------------------------------------------------|--------------------|
| <b>Title and abstract</b>    | 1      | (a) Indicate the study's design with a commonly used term in the title or the abstract                                                                                               | 1                  |
|                              |        | (b) Provide in the abstract an informative and balanced summary of what was done and what was found                                                                                  | 2                  |
| <b>Introduction</b>          |        |                                                                                                                                                                                      |                    |
| Background/rationale         | 2      | Explain the scientific background and rationale for the investigation being reported                                                                                                 | 3,4                |
| Objectives                   | 3      | State specific objectives, including any prespecified hypotheses                                                                                                                     | 4                  |
| <b>Methods</b>               |        |                                                                                                                                                                                      |                    |
| Study design                 | 4      | Present key elements of study design early in the paper                                                                                                                              | 4                  |
| Setting                      | 5      | Describe the setting, locations, and relevant dates, including periods of recruitment, exposure, follow-up, and data collection                                                      | 4                  |
| Participants                 | 6      | (a) Give the eligibility criteria, and the sources and methods of selection of participants                                                                                          | 4                  |
| Variables                    | 7      | Clearly define all outcomes, exposures, predictors, potential confounders, and effect modifiers. Give diagnostic criteria, if applicable                                             | 5                  |
| Data sources/<br>measurement | 8*     | For each variable of interest, give sources of data and details of methods of assessment (measurement). Describe comparability of assessment methods if there is more than one group | 5                  |
| Bias                         | 9      | Describe any efforts to address potential sources of bias                                                                                                                            | 5                  |
| Study size                   | 10     | Explain how the study size was arrived at                                                                                                                                            | 5                  |
| Quantitative variables       | 11     | Explain how quantitative variables were handled in the analyses. If applicable, describe which groupings were chosen and why                                                         | 5                  |
| Statistical methods          | 12     | (a) Describe all statistical methods, including those used to control for confounding                                                                                                | 5,6                |
|                              |        | (b) Describe any methods used to examine subgroups and interactions                                                                                                                  | 5,6                |
|                              |        | (c) Explain how missing data were addressed                                                                                                                                          | 5,6                |
|                              |        | (d) If applicable, describe analytical methods taking account of sampling strategy                                                                                                   | 5,6                |
|                              |        | (e) Describe any sensitivity analyses                                                                                                                                                | 5,6                |
| <b>Results</b>               |        |                                                                                                                                                                                      |                    |

|                          |     |                                                                                                                                                                                                              |     |
|--------------------------|-----|--------------------------------------------------------------------------------------------------------------------------------------------------------------------------------------------------------------|-----|
| Participants             | 13* | (a) Report numbers of individuals at each stage of study—eg numbers potentially eligible, examined for eligibility, confirmed eligible, included in the study, completing follow-up, and analysed            | 6   |
|                          |     | (b) Give reasons for non-participation at each stage                                                                                                                                                         | 6   |
|                          |     | (c) Consider use of a flow diagram                                                                                                                                                                           | 6   |
| Descriptive data         | 14* | (a) Give characteristics of study participants (eg demographic, clinical, social) and information on exposures and potential confounders                                                                     | 6   |
|                          |     | (b) Indicate number of participants with missing data for each variable of interest                                                                                                                          | 6   |
| Outcome data             | 15* | Report numbers of outcome events or summary measures                                                                                                                                                         | 6,7 |
| Main results             | 16  | (a) Give unadjusted estimates and, if applicable, confounder-adjusted estimates and their precision (eg, 95% confidence interval). Make clear which confounders were adjusted for and why they were included | 6,7 |
|                          |     | (b) Report category boundaries when continuous variables were categorized                                                                                                                                    | 6,7 |
|                          |     | (c) If relevant, consider translating estimates of relative risk into absolute risk for a meaningful time period                                                                                             |     |
| Other analyses           | 17  | Report other analyses done—eg analyses of subgroups and interactions, and sensitivity analyses                                                                                                               | 6,7 |
| <b>Discussion</b>        |     |                                                                                                                                                                                                              |     |
| Key results              | 18  | Summarise key results with reference to study objectives                                                                                                                                                     | 8,9 |
| Limitations              | 19  | Discuss limitations of the study, taking into account sources of potential bias or imprecision. Discuss both direction and magnitude of any potential bias                                                   | 9   |
| Interpretation           | 20  | Give a cautious overall interpretation of results considering objectives, limitations, multiplicity of analyses, results from similar studies, and other relevant evidence                                   | 8,9 |
| Generalisability         | 21  | Discuss the generalisability (external validity) of the study results                                                                                                                                        | 8,9 |
| <b>Other information</b> |     |                                                                                                                                                                                                              |     |
| Funding                  | 22  | Give the source of funding and the role of the funders for the present study and, if applicable, for the original study on which the present article is based                                                | 10  |

\*Give information separately for cases and controls in case-control studies and, if applicable, for exposed and unexposed groups in cohort and cross-sectional studies.

**Note:** An Explanation and Elaboration article discusses each checklist item and gives methodological background and published examples of transparent reporting. The STROBE checklist is best used in conjunction with this article (freely available on the Web sites of PLoS Medicine at <http://www.plosmedicine.org/>, Annals of Internal Medicine at <http://www.annals.org/>, and Epidemiology at <http://www.epidem.com/>). Information on the STROBE Initiative is available at [www.strobe-statement.org](http://www.strobe-statement.org).

# BMJ Open

## Cardiovascular risk factors as predictors of coronary artery disease assessed using CAD-RADS classification: a cross-sectional study in Romanian population

|                                 |                                                                                                                                                                                                                                                                                                                                                                                                                                                                                                                                                                                                                                                                                                                                                                                                                                                                                                                                                                                                                                                                   |
|---------------------------------|-------------------------------------------------------------------------------------------------------------------------------------------------------------------------------------------------------------------------------------------------------------------------------------------------------------------------------------------------------------------------------------------------------------------------------------------------------------------------------------------------------------------------------------------------------------------------------------------------------------------------------------------------------------------------------------------------------------------------------------------------------------------------------------------------------------------------------------------------------------------------------------------------------------------------------------------------------------------------------------------------------------------------------------------------------------------|
| Journal:                        | <i>BMJ Open</i>                                                                                                                                                                                                                                                                                                                                                                                                                                                                                                                                                                                                                                                                                                                                                                                                                                                                                                                                                                                                                                                   |
| Manuscript ID                   | bmjopen-2019-031799.R2                                                                                                                                                                                                                                                                                                                                                                                                                                                                                                                                                                                                                                                                                                                                                                                                                                                                                                                                                                                                                                            |
| Article Type:                   | Original research                                                                                                                                                                                                                                                                                                                                                                                                                                                                                                                                                                                                                                                                                                                                                                                                                                                                                                                                                                                                                                                 |
| Date Submitted by the Author:   | 09-Dec-2019                                                                                                                                                                                                                                                                                                                                                                                                                                                                                                                                                                                                                                                                                                                                                                                                                                                                                                                                                                                                                                                       |
| Complete List of Authors:       | Popa, Loredana; University of Medicine and Pharmacy Targu Mures, Radiology; Hiperdia-Affidea Imaging Center<br>Petresc, Bianca; Cluj-Napoca County Emergency Hospital, Radiology<br>Cătană, Cristina; Cluj-Napoca County Emergency Hospital, Radiology<br>Moldovanu, Claudia; Cluj-Napoca County Emergency Hospital, Radiology<br>Feier, Diana; Iuliu Hațieganu University of Medicine and Pharmacy; Hiperdia-Affidea Imaging Center, Radiology<br>Lebovici, Andrei; Iuliu Hațieganu University of Medicine and Pharmacy, Radiology; Hiperdia-Affidea Imaging Center, Radiology<br>Schiau, Călin; Iuliu Hațieganu University of Medicine and Pharmacy, Radiology<br>Rancea, Raluca; Heart Institute Nicolae Stancioiu Cluj-Napoca, Cardiology<br>Molnar, Adrian; Heart Institute Nicolae Stancioiu Cluj-Napoca, Cardiovascular Surgery; Iuliu Hațieganu University of Medicine and Pharmacy, Cardiovascular and Thoracic Surgery<br>Buruian, Mircea; University of Medicine and Pharmacy Targu Mures, Radiology; Emergency County Hospital Targu-Mures, Radiology |
| <b>Primary Subject Heading</b>: | Cardiovascular medicine                                                                                                                                                                                                                                                                                                                                                                                                                                                                                                                                                                                                                                                                                                                                                                                                                                                                                                                                                                                                                                           |
| Secondary Subject Heading:      | Radiology and imaging                                                                                                                                                                                                                                                                                                                                                                                                                                                                                                                                                                                                                                                                                                                                                                                                                                                                                                                                                                                                                                             |
| Keywords:                       | coronary artery disease, coronary CT angiography, CAD-RADS, cardiovascular risk factors                                                                                                                                                                                                                                                                                                                                                                                                                                                                                                                                                                                                                                                                                                                                                                                                                                                                                                                                                                           |
|                                 |                                                                                                                                                                                                                                                                                                                                                                                                                                                                                                                                                                                                                                                                                                                                                                                                                                                                                                                                                                                                                                                                   |

SCHOLARONE™  
Manuscripts

# Cardiovascular risk factors as predictors of coronary artery disease assessed using CAD-RADS classification: a cross-sectional study in Romanian population

## Authors:

Loredana Elisabeta Popa<sup>1,2</sup>, Bianca Petresc<sup>3</sup>, Cristina Cătană<sup>3</sup>, Claudia Gabriela Moldovanu<sup>3</sup>, Diana-Sorina Feier<sup>2,3,4</sup>, Andrei Lebovici<sup>2,3,4</sup>, Călin Schiau<sup>4</sup>, Raluca Alina Rancea<sup>5</sup>, Adrian Molnar<sup>6,7</sup>, Mircea Marian Buruian<sup>1,8</sup>

## Affiliations:

1. Department of Radiology, University of Medicine and Pharmacy Targu Mures  
Address: Gh. Marinescu Street, nr. 50, 540136, Targu Mures, Romania
2. Department of Radiology, Hiperdia-Affidea Imaging Center Cluj-Napoca  
Address: Republicii Street, nr. 105A, 400000, Cluj-Napoca, Romania
3. Department of Radiology, County Emergency Hospital Cluj-Napoca  
Address: Clinicilor Street, nr. 1-3, 400006, Cluj-Napoca, Romania
4. Department of Radiology, “Iuliu Hațieganu” University of Medicine and Pharmacy, Cluj-Napoca, Romania  
Address: Clinicilor Street, nr. 1-3, 400006, Cluj-Napoca, Romania
5. Department of Cardiology, Heart Institute “Nicolae Stancioiu” Cluj-Napoca  
Address: Motilor Street, nr. 19-21, 400001 Cluj-Napoca, Romania
6. Department of Cardiovascular Surgery, Heart Institute “Nicolae Stancioiu” Cluj-Napoca  
Romania  
Address: Motilor Street, nr. 19-21, 400001 Cluj-Napoca, Romania
7. Department of Cardiovascular and Thoracic Surgery Surgery, “Iuliu Hațieganu”  
University of Medicine and Pharmacy, Cluj-Napoca, Romania  
Address: Motilor Street, nr. 19-21, 400001 Cluj-Napoca, Romania
8. Department of Radiology, Emergency County Hospital Targu Mures  
Address: Gh. Marinescu Street, nr. 50, 540136, Targu Mures, Romania

## Corresponding Author:

Bianca Petresc

Email: bianca.petresc@gmail.com

Phone: +40734714327

Address: Department of Radiology, County Emergency Hospital Cluj-Napoca, Clinicilor Street, nr. 1-3, 400006, Cluj-Napoca, Romania

ORCID: 0000-0003-2167-9350

## Abstract

**Objectives:** This study aimed to evaluate the association between cardiovascular risk factors and CAD-RADS score in the Romanian population. CAD-RADS is a new, standardized method to assess coronary artery disease (CAD) using coronary computed tomography angiography (CCTA).

**Design:** A cross-sectional observational, patient-based study.

**Setting:** Referred imaging center for coronary artery disease in Transylvania, Romania.

**Participants:** We retrospectively reviewed 674 patients who underwent CCTA between January 2017 and August 2018. The exclusion criteria included: previously known CAD, defined as prior myocardial infarction, percutaneous coronary intervention or coronary artery bypass graft surgery (n=91), cardiac CT for other than evaluation of possible CAD (n=85), significant arrhythmias compromising imaging quality (n=23). Finally, 475 patients fulfilled the inclusion criteria.

**Methods:** Demographical, clinical and CCTA characteristics of the patients were obtained. Coronary artery disease was evaluated using CAD-RADS score. Obstructive CAD was defined as  $\geq 50\%$  stenosis of  $\geq 1$  coronary segment on CCTA.

**Results:** We evaluated the association between risk factors and CAD-RADS score in univariate and multivariable analysis. We divided the patients into 2 groups according to the CAD-RADS system: group 1: CAD-RADS score between 0-2 (stenosis  $< 50\%$ ) and group 2: CAD-RADS score  $\geq 3$  (stenosis  $\geq 50\%$ ). On univariate analysis, male gender, age, hypertension, dyslipidemia, smoking and diabetes mellitus were positively associated with a CAD-RADS score  $\geq 3$ . On the multivariable analysis, male sex, age, dyslipidemia, hypertension and smoking remained significant predictors of obstructive CAD.

**Conclusion:** This study demonstrated a significant association between multiple cardiovascular risk factors and a higher coronary atherosclerotic burden assessed using CAD-RADS system in the Romanian population.

**Keywords:** coronary artery disease; coronary CT angiography; CAD-RADS; cardiovascular risk factors

## Article Summary

### Strengths and limitations of this study

- This is the first study to evaluate the association of cardiovascular risk factors and coronary artery disease assessed using coronary CT angiography in Romania.
- We quantified the coronary artery stenosis using the CAD-RADS classification, the newest, standardized method for reporting CAD.
- The patients were recruited from a single center; therefore, the study population was relatively small.
- Another limitation is the design of the study: a cross-sectional, retrospective one.

## Introduction

Coronary artery disease (CAD) is one of the major causes of morbidity and mortality worldwide. Even though CAD mortality rates have declined since 1980s, it still accounts for approximately one-third of all deaths of individuals aged over 35 years old (1,2).

It is well-known that atherosclerosis is the underlying cause of cardiovascular diseases and multiple risk factors augment the atherosclerotic process. These risk factors include non-modifiable ones such as age and sex and modifiable risk factors such as hypertension, dyslipidemia, obesity, diabetes mellitus and smoking (3-7). Studies suggest that the majority of patients with CAD have at least one modifiable risk factor and their presence has an impactful role in the progression of CAD (8, 9). Many risk-scoring systems have been developed such as Framingham and SCORE which are based on the presence of various traditional cardiovascular risk factors (10, 11). Assessment of comorbidities and lifestyle together with basic laboratory investigations are recommended as step 2 and step 3 in the approach of patients with angina and suspected CAD (12). After identifying the potential cardiovascular risk factors and establishing the pretest probability and clinical likelihood of coronary artery disease, the next step is to select the appropriate tests for the diagnosis of CAD (12).

With the recent advancements made in medical technology, coronary CT angiography (CCTA) has rapidly evolved into one of the most highly accurate methods for diagnosis and evaluation of CAD. It is a unique non-invasive test which can provide direct and accurate visualization of the coronary vessel lumen, being able to quantify the presence and extent of coronary stenosis and to assess the characteristics of coronary atherosclerotic plaques (13).

In the latest ESC guideline for the diagnosis and management of chronic coronary syndromes, CCTA has been categorized as class I recommendation for diagnosing CAD in symptomatic patients in whom obstructive CAD cannot be excluded by clinical assessment alone. Also, it can be considered as an alternative investigation to invasive angiography if another non-invasive test is equivocal or non-diagnostic (12).

In 2016, the Society of Cardiovascular Computed Tomography published the CAD-RADS grading system, which is a standardized reporting method of CCTA results. This is meant to

1  
2  
3 facilitate communication of the results along with suggestions for consecutive management of the  
4 patients. The grading system ranges from 0 to 5, where CAD-RADS 0 score means a complete  
5 absence of stenosis and CAD-RADS 5 represents total occlusion of at least 1 coronary segment  
6 (14).  
7  
8

9 Among European countries, Romania is one of the leading countries regarding the CVD  
10 mortality burden, having the second highest standardized death rate caused by ischemic heart  
11 disease (15). Also, the prevalence of cardiovascular risk factors is relatively high in our country.  
12 Romania is on the fourth place in Europe concerning raised blood pressure, on the 8<sup>th</sup> place  
13 regarding the presence of diabetes mellitus (16, 17) and an increasing trend in the incidence of  
14 obesity (18).  
15  
16

17 The aim of this study is to evaluate the association between traditional cardiovascular risk factors  
18 and coronary artery disease evaluated using the CAD-RADS score in the Romanian population.  
19  
20

## 21 **Methods**

### 22 *Study population*

23 We retrospectively reviewed 674 consecutive patients who underwent CCTA between January  
24 2017 and August 2018 in our institution. The indications for CCTA were: atypical angina, typical  
25 angina with an inconclusive stress test, patients with intermediate/high-risk for major cardiac  
26 events. The exclusion criteria included: previously known CAD, defined as prior myocardial  
27 infarction, percutaneous coronary intervention or coronary artery bypass graft surgery (n=91),  
28 cardiac CT for other than evaluation of possible CAD (n=85), significant arrhythmias  
29 compromising imaging quality (n=23). Besides these exclusion criteria, patients with renal  
30 failure, documented contrast allergy or pregnant women did not perform the CT examination.  
31 Finally, 475 patients fulfilled the inclusion criteria.  
32  
33  
34  
35  
36  
37

### 38 *Scan protocol*

39 All CCTA scans were performed with a 64-sliced multi-detector CT (Sensation 64, Siemens,  
40 Forchheim, Germany). The scanning parameters were: slices/collimation 64/0.6 mm, tube voltage  
41 120 kv, 850 mAs, gantry rotation time 330 ms, pitch 0.2, effective slice thickness 0.75 mm and  
42 reconstruction increment 0.4 mm. Patients with a heart-rate > 70 bpm received premedication  
43 with oral beta-blockers 1 hour prior to the examination. Short-acting nitroglycerine sublingual  
44 spray was administered to all patients for coronary vasodilatation.  
45  
46  
47  
48

49 First, a non-contrast enhanced scan was performed in order to assess the coronary artery calcium  
50 score (CACS), followed by the coronary computed tomography angiography (CCTA) to evaluate  
51 the coronary artery lumen and to characterize the atherosclerotic plaques. A bolus of 80 ml of  
52 iodinated contrast medium was administered intravenously at 5 ml/sec, followed by 40 ml of  
53 saline injected at the same rate. After the acquisition, the images were transferred to a dedicated  
54  
55  
56  
57

workstation for post-processing, which included multiplanar reconstructions (MPR), maximum intensity projections (MIP) and volume rendering images (VRT).

### ***Coronary artery analysis***

All CCTA images were assessed by an experienced radiologist who was blinded to the study (LE.P.). CACS was calculated using a semi-automatically software, according to the Agatston method. Plaque composition was classified as: calcified, non-calcified or mixed, with calcified coronary plaque being defined as any structure with a density  $\geq 130$  HU.

Coronary atherosclerotic lesions were quantified for stenosis by visual estimation. We evaluated only the coronary segments with a diameter greater than 1.5 mm.

Every patient received a final CAD-RADS score based on the extent of coronary stenosis (Figure 1). CAD-RADS score of 0 was assigned if there was a total absence of coronary plaques or stenosis. Minimal coronary stenosis between 1-24% was considered CAD-RADS 1. CAD-RADS score 2 was given when there was a mild stenosis between 25-49%. CAD-RADS score of 3 corresponded to a moderate stenosis between 50-69%. CAD-RADS score of 4 was assigned if there was a single coronary stenosis between 70-99% or if the left main artery was depicted with a stenosis of more than 50%. Also, CAD-RADS score of 4 was given in the situation of 3-vessel obstructive disease, when there were stenosis of more than 70% involving all the three coronary arteries (left anterior descending artery, circumflex artery and right coronary artery). If total occlusion was identified in at least one coronary segment, a CAD-RADS score of 5 was assigned.

Obstructive CAD was defined as  $\geq 50\%$  stenosis of  $\geq 1$  coronary segments on CCTA.

### ***Cardiovascular risk factors***

Prior to CCTA, a detailed medical history with the risk factors was obtained from all patients. Hypertension was defined as blood pressure  $\geq 140/90$  mm Hg or treatment with antihypertensive medications (19). Dyslipidemia was defined as a total cholesterol level  $\geq 5$  mmol/L (20) or treatment with lipid-lowering medications. Diabetes mellitus was defined as fasting plasma glucose  $\geq 126$  mg/dl or the use of insulin or oral antidiabetic agents. Obesity was defined as body mass index (BMI)  $\geq 30$  kg/m<sup>2</sup>. Self-reported smoking status was obtained by a query regarding both current and previous smoking history. Classification of symptoms (typical angina, atypical angina, non-anginal pain) was judged by cardiologists using patient interviews conducted prior to the CT examination.

### ***Statistical analysis***

Categorical variables were presented as numbers and percentages. Continuous variables with normal distribution were expressed as means  $\pm$  standard deviation, those with non-normal distribution as median with interquartile range. Normality was tested with the Kolmogorov-Smirnov test.



1  
2  
3 Differences between CAD-RADS groups were evaluated using one-way analysis of variance  
4 (ANOVA) for continuous variables and  $\chi^2$  test for categorical variables. Whenever the  
5 distribution of continuous data was not normal, non-parametric Kruskal-Wallis test was used for  
6 comparison.  
7  
8

9 Cardiovascular risk factors that showed a significant association with the CAD-RADS score were  
10 included in multivariable logistic regression analysis in order to evaluate their simultaneous  
11 influence. Through logistic regression analysis, independent predictors for obstructive CAD  
12 (CAD-RADS score  $\geq 3$ ) were identified.  
13  
14

15 For all comparisons, a p value of  $<0.05$  was considered statistically significant. The statistical  
16 analysis was performed using commercially available software (MedCalc for Windows, version  
17 14.8, MedCalc Software, Ostend, Belgium).  
18  
19

### 20 *Patient and Public Involvement*

21 There was no involvement of patients and/or public in this study.  
22  
23

## 24 **Results**

### 25 *Baseline characteristics of the study population*

26  
27 The clinical and angiographic characteristics of our study population according to the CAD-  
28 RADS classification are shown in Supplementary Table 1. Among the 475 patients included in  
29 this study, the mean age was  $57.8 \pm 13.2$  years and the majority of them were females: 54.4%.  
30 There was a high prevalence of both hypertensive (74.5%) and dyslipidemic (69.7%) patients.  
31 The percentage of diabetic patients was relatively small, with only 19.3% individuals having this  
32 condition. Smoking was reported among 46.3% of the study group. The majority of the patients  
33 were symptomatic, 72.6 % presenting with either typical or atypical angina.  
34  
35

36 When we classified the patients according to the CAD-RADS score, 177 of them had CAD-  
37 RADS score=0, 99 patients had CAD-RADS score=1 while 80 patients CAD-RADS score=2. A  
38 percentage of 14.1% of people included in this study were diagnosed with CAD-RADS 3 score.  
39 Finally, 9.3% patients had severe stenosis, with a CAD-RADS score of 4 and 8 patients had total  
40 occlusion of a coronary segment (CAD-RADS score=5).  
41  
42

43 Patient gender, age, the presence of hypertension, dyslipidemia, diabetes mellitus as well as  
44 clinical presentation and coronary artery calcium score were significantly different across CAD-  
45 RADS scores ( $p < 0.0001$  for all comparisons) (Supplementary Table 1). However, our results  
46 did not reveal any association between obesity and different CAD-RADS scores ( $p=0.63$ )  
47 (Supplementary Table 1).  
48  
49  
50  
51  
52

### 53 *CAD-RADS score and multiple cardiovascular risk factors*

Using the cardiovascular risk factors mentioned above, we tested if there is any association regarding their presence and obstructive coronary artery disease, defined as coronary stenosis  $\geq 50\%$  and equivalent with a CAD-RADS score  $\geq 3$  (Table 1).

Our results show that a CAD-RADS score between 0-2 was more frequent in younger patients, with a mean age of  $55.41 \pm 13.11$  years in this subgroup, while patients with CAD-RADS score  $\geq 3$  had a higher mean age of  $63.1 \pm 10.55$  years (Table 1). Regarding gender, patients with CAD-RADS scores higher than 3 were more frequently males. The majority of the female patients (82.9%) received a CAD-RADS score of 0, 1 or 2 (Table 1).

Our findings indicated a positive association between systolic hypertension and CAD-RADS score, with over 90% of the patients with moderate/severe stenosis (CAD-RADS  $\geq 3$ ) being hypertensive (Table 1). Moreover, based on our results, patients with CAD-RADS scores  $\geq 3$  had a greater frequency of dyslipidemia, with more than 85% patients in these categories being also dyslipidemic (Table 1).

Furthermore, the proportion of smokers was larger among patients identified with higher CAD-RADS scores: almost two-third of the patients who received a CAD-RADS score  $\geq 3$  admitted the use of cigarettes (Table 1). On the other hand, in the CAD-RADS groups of 0, 1 and 2 the percentage of the smokers was less than 50% (Table 1).

Regarding the association between diabetes mellitus and CAD-RADS score, our results show increasing percents of diabetic individuals proportional with higher CAD-RADS scores: from 16.3% diabetic patients with CAD-RADS scores of 0-2 to 28.6% diabetic patients with CAD-RADS scores  $\geq 3$  (Table 1). However, the percentage of obese patients did not differ significantly among different CAD-RADS groups (Table 1).

### ***Multivariable analysis***

According to the multivariable analysis, male sex, age, hypertension, dyslipidemia and smoking remained major predictors of obstructive CAD defined as CAD-RADS score  $\geq 3$  (Table 2). Males had more than 3 times higher odds of developing significant coronary stenosis. The odds ratio for coronary stenosis  $\geq 50\%$  was approximately 3.5-fold greater in hypertensive individuals. Our results showed that having dyslipidemia significantly increased the odds of moderate/severe coronary stenosis by more than 2.5 times. Last but not least, smoking was associated with increased odds of having CAD-RADS score  $\geq 3$  by approximately 2 times.

## **Discussion**

Romania is one of the high cardiovascular risk European countries according to data from the last European Society of Cardiology guideline for prevention of CVD (3). There are only a limited number of national epidemiological studies which estimate the prevalence and future trends of cardiovascular risk factors in the Romanian population. (21-25). The latest study from 2017, Sephar III, shows an increasing trend regarding the majority of cardiovascular risk factors in our

1  
2  
3 population (23). The prevalence of hypertension increased from 40.4% in 2011 to 45.1% in 2016  
4 (22, 23). Moreover, the percentage of Romanians diagnosed with dyslipidemia is alarmingly  
5 high, reaching 77.3% in 2016, with 53.4% newly diagnosed cases (23). Furthermore, the  
6 prevalence of diabetes mellitus, another important risk factor for coronary artery disease, is  
7 12.4% (24), a relatively high percentage that puts Romania on the 8th place in Europe regarding  
8 this medical condition (16). Overweight and obesity represent another medical issue encountered  
9 in our country. Both PREDATORR and Sephar III studies (23, 25) reported a prevalence of over  
10 30% of obese patients based on BMI index, similar to the data from WHO database which shows  
11 an increasing trend of obesity in our country over the last 40 years (18). Last but not least,  
12 smoking can be considered another cause for the high incidence of cardiovascular disease in our  
13 country. Even if there is a decreasing trend regarding this habit in our country, Romania still  
14 occupies one of the leading places in European Union, with 28% of individuals reporting the use  
15 of cigarettes, a number higher than the average European percentage: 26% (26). According to the  
16 data by the National Institute for Public Health in Romania, tobacco is attributed to 16.3% CVD-  
17 Related deaths in Romania. (27).  
18  
19  
20

21 In Europe, Romania records one of the greatest incidences of cardiovascular diseases, according  
22 to the latest statistics offered by EuroStat in 2018 (15). Our country occupies the second place in  
23 Europe regarding the percent of total deaths caused by diseases of the circulatory system (15).  
24 Concerning the standardized death rates caused by ischemic heart disease, Romania is also one of  
25 the leading countries, being on the 6th and 5th place in deaths of men and women respectively  
26 (15).  
27  
28

29 CAD-RADS is a standardized radiological reporting system dating since 2016 and there are only  
30 a few studies published in the area of cardiac imaging using the CAD-RADS score (28-32). It is  
31 used to quantify coronary artery stenosis in patients with suspected or known coronary artery  
32 disease in order to provide a basis for further investigation, diagnosis, management and  
33 treatment, substantially reducing human error and improving data integrity (14).  
34  
35

36 To the best of our knowledge, our study is the first one to evaluate the association between  
37 multiple associations of cardiovascular risk factors and the severity of coronary artery disease  
38 assessed on CCTA and evaluated using CAD-RADS classification in the Romanian population.  
39  
40

41 The association between cardiovascular risk factors and cardiovascular events was first  
42 demonstrated by the Framingham study through an epidemiological approach (33). The  
43 INTERHEART study showed that the cumulative effect of risk factors increased the risk of CAD,  
44 especially of myocardial infarction worldwide, in both sexes and all ages worldwide (34).  
45  
46

47 Our research reports that male sex, age, dyslipidemia, hypertension and smoking are the  
48 significant predictors of obstructive CAD defined as CAD-RADS score  $\geq 3$ , with the prevalence  
49 being increased by a cumulative effect on them.  
50

51 Male sex and age are well-known risk factors for coronary atherosclerosis, being used in  
52 prediction models for the estimation of pretest probability of developing coronary artery disease  
53 (12, 35). Among medical risk factors, our study showed that hypertension and dyslipidemia were  
54 positively associated with CAD-RADS score  $\geq 3$  in both univariate and multivariable analyses.  
55 Our results are in concordance with the latest data from European Heart Network which shows  
56  
57

1  
2  
3 that systolic blood pressure and total cholesterol levels are the determinants with the greatest  
4 contribution to CVD mortality (17). Also, these two factors are included in the widely used  
5 SCORE charts (3) and there are many clinical models that add them for increasing the probability  
6 of obstructive CAD (36-39).  
7

8  
9 Our multivariable analysis did not find an association between diabetes mellitus and obstructive  
10 CAD, one possible explanation being that only 19.3% of our study group had diabetes as their  
11 comorbidity.  
12

13 Also, we did not find a direct association between obesity and coronary artery burden defined by  
14 CAD-RADS score. Our study is in concordance with Medakovic et al (40) and Dores H et al  
15 (41). According to Dores H et al, obesity assessed by BMI can be an indicator of the presence of  
16 CAD, but not necessarily associated with its severity (41). They also described an “obesity  
17 paradox” with better outcomes after percutaneous coronary interventions at patients with a higher  
18 BMI (41). One hypothesis for this paradox is that obese patients tend to be diagnosed at an earlier  
19 age and stage of CAD, therefore having lower morbidity and mortality rates (42, 43). Another  
20 potential reason for better outcomes of obese patients compared to those of underweight ones is  
21 that the latter group is more likely to have post procedural complications due to excessive  
22 anticoagulation which is usually not weight adjusted (44, 45). Moreover, underweight patients  
23 usually have more concomitant comorbidities which lead to worse prognosis (46). Another theory  
24 is that obesity is associated with higher amounts of lean mass and which can have a protective  
25 effect when not associated with increased systemic inflammation (47).  
26  
27  
28

29 Finally, our findings show that smoking is an independent risk factor for the presence of  
30 obstructive coronary disease, this being also one of the behavioral factors with the highest  
31 contribution for CVD mortality and morbidity rates across Europe (17).  
32  
33

### 34 **Limitations of the study**

35  
36  
37 Our study has several limitations, the most important one being the fact that it is a retrospectively  
38 conducted one. Secondary, our results were confined to the experience of a single medical center  
39 and the findings of this study were based on a relatively small patient population. Regarding the  
40 risk factors, dyslipidemia was not analyzed by fractions of the cholesterol: LDL-C and HDL-C.  
41 Also, we did not analyze other additional risk factors like alcohol use, physical activity,  
42 anthropometric measurements or C-reactive protein levels. Taking the retrospective approach into  
43 consideration, our research assess only the association between traditionally known cardiovascular  
44 risk factors and coronary stenosis evaluated by CAD-RADS score and does not assess the  
45 incidence of major cardiac events after performing the CT angiography.  
46  
47  
48  
49  
50  
51  
52  
53  
54  
55  
56  
57

## Conclusion

In conclusion, our study demonstrates that there is a significant association between multiple cardiovascular risk factors and a higher coronary atherosclerotic burden assessed using CAD-RADS score in the Romanian population. Considering CAD as a priority for Romanian healthcare system, our study provides an overview of imaging and clinical characteristics of CAD and their association, offering valuable information for both cardiologists and radiologists in order to improve the management of the patients.

### Author contributions:

- Conception (constructing the idea for research): Loredana E. Popa, Mircea M. Buruian
- Design (planning methodology to reach the conclusion): Loredana E. Popa, Diana Feier, Andrei Lebovici, Raluca Rancea
- Supervision (organising and supervising the course of the project): Loredana E. Popa, Mircea M. Buruian, Adrian Molnar
- Data Collection and Processing: Raluca Rancea, Calin Schiau, Cristina Catana, Claudia G. Moldovanu, Bianca Petresc
- Analysis and interpretation: Bianca Petresc, Diana Feier
- Literature Review: Bianca Petresc, Calin Schiau, Cristina Catana, Claudia G. Moldovanu
- Writing of the manuscript: Loredana E. Popa, Bianca Petresc, Cristina Catana, Claudia G. Moldovanu
- Critical Review: Adrian Molnar, Andrei Lebovici, Diana Feier, Mircea M. Buruian

**Acknowledgements:** None.

**Funding:** This research received no specific grant from any funding agency in the public, commercial or not-for-profit sectors.

**Competing interest:** None declared.

**Ethics approval:** The study was approved by the Ethics Committees of University of Medicine and Pharmacy “Iuliu Hatieganu” Cluj-Napoca (455/19.12.2018) and University of Medicine and Pharmacy Targu Mures (272/21.11.2018). The Institutional Review Board approved this retrospective, HIPAA-compliant study and waived written informed consent. (1339/25.09.2018)

**Patient consent for publication:** Not required.

**Data sharing statement:** Deidentified participant data are available upon request through the corresponding author BP. ORCID identifier 0000-0003-2167-9350.

## References

1. Timmis A, Townsend N, Gale C, Grobbee R, Maniadakis N, Flather M, et al. European society of cardiology: cardiovascular disease statistics 2017. *Eur Heart J.* 2018; 39:508–79.
2. Moran AE, Forouzanfar MH, Roth GA, Mensah GA, Ezzati M, Murray CJ, Naghavi M. Temporal trends in ischemic heart disease mortality in 21 world regions, 1980 to 2010: the Global Burden of Disease 2010 study. *Circulation* 2014 129(14):1483-92.
3. Piepoli MF, Hoes AW, Agewall S, Albus C, Brotons C, Catapano A, et al. 2016 European Guidelines on cardiovascular disease prevention in clinical practice: The Sixth Joint Task Force of the European Society of Cardiology and Other Societies on Cardiovascular Disease Prevention in Clinical Practice (constituted by representatives of 10 societies and by invited experts) Developed with the special contribution of the European Association for Cardiovascular Prevention & Rehabilitation (EACPR). *Eur Heart J.* 2016; 37(29):2315-81.
4. Rivera JJ, Nasir K, Cox PR, Choi EK, Yoon Y, Cho I, et al. Association of traditional cardiovascular risk factors with coronary plaque sub-types assessed by 64-slice computed tomography angiography in a large cohort of asymptomatic subjects. *Atherosclerosis* 2009;206:451–57.
5. Rapsomaniki E, Timmis A, George J, Pujades-Rodriguez M, Shah AD, Denaxas S, et al. Blood pressure and incidence of twelve cardiovascular diseases: lifetime risks, healthy life-years lost, and age-specific associations in 1·25 million people. *Lancet* 2014;383(9932):1899-1911.
6. Pekkanen J, Linn S, Heiss G, Suchindran CM, Leon A, Rifkind BM, Tyroler HA. Ten-year mortality from cardiovascular disease in relation to cholesterol level among men with and without preexisting cardiovascular disease. *N Eng J Med.* 1990;322:1700–07.
7. Greenland P, Knoll MD, Stamler J, Neaton JD, Dyer AR, Garside DB, et al. Major Risk Factors as Antecedents of Fatal and Nonfatal Coronary Heart Disease Events. *JAMA* 2003;290(7):891–7.
8. Canto JG, Kiefe CI, Rogers WJ, Peterson ED, Frederick PD, French WJ, et al. Number of coronary heart disease risk factors and mortality in patients with first myocardial infarction. *JAMA* 2011;306(19):2120-7.
9. Kronmal RA, McClelland RL, Detrano R, Shea S, Lima JA, Cushman M, et al. Risk factors for the progression of coronary artery calcification in asymptomatic subjects: results from the Multi-Ethnic Study of Atherosclerosis (MESA). *Circulation* 2007; 115:2722–30.
10. D’Agostino RB Sr, Vasan RS, Pencina MJ, Wolf PA, Cobain M, Massaro JM, et al. General cardiovascular risk profile for use in primary care: the Framingham Heart Study. *Circulation* 2008; 117:743 –53.

11. Conroy RM, Pyorala K, Fitzgerald AP, Sans S, Menotti A, De Baker S, et al. Estimation of ten-year risk of fatal cardiovascular disease in Europe: the SCORE project. *Eur Heart J*. 2003; 24:987–1003.
12. Knuuti J, Wijns W, Saraste A, Capodanno D, Barbato E, Funck-Brentano C, et al. 2019 ESC Guidelines for the diagnosis and management of chronic coronary syndromes. *Eur Heart J*. 2019 Aug 31;. doi: 10.1093/eurheartj/ehz425. [Epub ahead of print]
13. Mangla A, Oliveros E, Williams KA Sr, Kalra DK. Cardiac imaging in the diagnosis of coronary artery disease. *Curr Probl Cardiol*. 2017;42:316–66.
14. Cury RC, Abbara S, Achenbach S, Agatston A, Berman DS, Budoff MJ et al. CAD-RADS(tm) coronary artery disease—reporting and data system. An expert consensus document of the society of cardiovascular computed tomography (SCCT), the American College of Radiology (ACR) and the North American Society for Cardiovascular Imaging (NASCI). Endorsed by the American College of Cardiology. *J Cardiovasc Comput Tomogr*. 2016;10:269–81.
15. [https://ec.europa.eu/eurostat/statisticsexplained/index.php/Cardiovascular\\_diseases\\_statistics](https://ec.europa.eu/eurostat/statisticsexplained/index.php/Cardiovascular_diseases_statistics)
16. International Diabetes Federation. IDF Diabetes Atlas, 8th edn. Brussels, Belgium. International Diabetes Federation, 2017. <http://www.diabetesatlas.org>
17. <http://www.ehnheart.org/images/CVD-statistics-report-August-2017.pdf>
18. [http://gamapserver.who.int/gho/interactive\\_charts/ncd/risk\\_factors/obesity/atlas.html](http://gamapserver.who.int/gho/interactive_charts/ncd/risk_factors/obesity/atlas.html)
19. Williams B, Mancia G, Spiering W, Agabiti Rosei E, Azizi M, Burnier M, et al. 2018 ESC/ESH guidelines for the management of arterial hypertension [published correction appears in *Eur Heart J*. 2019;40:475] .*Eur Heart J*. 2018; 39:3021–104.
20. [http://www.heartscore.org/en\\_GB/](http://www.heartscore.org/en_GB/)
21. Dorobantu M, Darabont RO, Badila E, Ghiorghe S. Prevalence, Awareness, Treatment, and Control of Hypertension in Romania: Results of the SEPHAR Study. *Int J Hypertens*. 2010 Feb 1;2010:970694
22. Dorobanțu M, Darabont R, Ghiorghe S, Babes K, Pop D, Toma D, Vet al. Profile of the Romanian hypertensive patient data from SEPHAR II study. *Rom J Intern Med*. 2012 Oct-Dec;50(4):285-96
23. Dorobantu M, Tautu OF, Dimulescu D, Sinescu C, Gusbeth-Tatomir P, Arsenescu-Georgescu C, et al. Perspectives on hypertension's prevalence, treatment and control in a high cardiovascular risk East European country: data from the SEPHAR III survey. *J Hypertens*. 2018 Mar;36(3):690-700.
24. Mota M, Popa SG, Mota E, Mitrea A, Catrinoiu D, Cheta DM, et al. Prevalence of diabetes mellitus and prediabetes in the adult Romanian population: PREDATORR study. *J Diabetes*. 2016 May;8(3):336-44.
25. Popa S, Moța M, Popa A, Moța E, Serafinceanu C, Guja C, et al Prevalence of overweight/obesity, abdominal obesity and metabolic syndrome and atypical cardiometabolic phenotypes in the adult Romanian population: PREDATORR study. *J Endocrinol Invest*. 2016 Sep;39(9):1045-53.

- 1  
2  
3  
4  
5  
6  
7  
8  
9  
10  
11  
12  
13  
14  
15  
16  
17  
18  
19  
20  
21  
22  
23  
24  
25  
26  
27  
28  
29  
30  
31  
32  
33  
34  
35  
36  
37  
38  
39  
40  
41  
42  
43  
44  
45  
46  
47  
48  
49  
50  
51  
52  
53  
54  
55  
56  
57  
58  
59  
60
26. <http://ec.europa.eu/commfrontoffice/publicopinion/index.cfm/Survey/getSurveyDetail/instruments/SPECIAL/surveyKy/2146>
  27. Simionescu M, Bilan S, Gavurova B, Bordea EN. Health Policies in Romania to Reduce the Mortality Caused by Cardiovascular Diseases. *Int J Environ Res Public Health*. 2019;16(17):3080. Published 2019 Aug 24. doi:10.3390/ijerph16173080
  28. Xie JX, Cury RC, Leipsic J, Crim MT, Berman DS, Gransar H et al. The Coronary Artery Disease-Reporting and Data System (CAD-RADS): Prognostic and Clinical Implications Associated With Standardized Coronary Computed Tomography Angiography Reporting. *JACC Cardiovasc Imaging*. 2018 Jan;11(1):78-89.
  29. Williams MC, Moss A, Dweck M, Hunter A, Pawade T, Adamson PD, et al. Standardized reporting systems for computed tomography coronary angiography and calcium scoring: A real-world validation of CAD-RADS and CAC-DRS in patients with stable chest pain. *J Cardiovasc Comput Tomogr*. 2019 Jul 26;. doi: 10.1016/j.jcct.2019.07.010. [Epub ahead of print].
  30. Rodriguez-Granillo GA, Carrascosa P, Goldsmit A, Arbab-Zadeh A. Invasive coronary angiography findings across the CAD-RADS classification spectrum. *Int J Cardiovasc Imaging*. 2019 Nov;35(11):1955-61.
  31. van Rosendaal AR, Shaw LJ, Xie JX, Dimitriu-Leen AC, Smit JM, Scholte AJ, et al. Superior Risk Stratification With Coronary Computed Tomography Angiography Using a Comprehensive Atherosclerotic Risk Score. *JACC Cardiovasc Imaging*. 2019 Oct;12(10):1987-97.
  32. Szilveszter B, Kolossváry M, Karády J, Jermendy ÁL, Károlyi M, Panajotu A, et al. Structured reporting platform improves CAD-RADS assessment. *J Cardiovasc Comput Tomogr*. 2017 Nov;11(6):449-54.
  33. Dawber TR, Meadors GF, Moore FE. Epidemiological Approaches to Heart Disease: The Framingham Study. *Am J Public Health Nations Health* 1951;41(3):279–86.
  34. Yusuf S, Hawken S, Ounpuu S, Dans T, Avezum A, Lanas F, et al. Effects of potentially modifiable risk factors associated with myocardial infarction in 52 countries (the INTERHEART study): case–control study. *Lancet* 2004;364:937–52.
  35. Genders TS, Steyerberg EW, Alkadhi H, Leschka S, Desbiolles L, Nieman K, et al. A clinical prediction rule for the diagnosis of coronary artery disease: validation, updating, and extension. *Eur Heart J* 2011;32:1316- 30.
  36. Genders TS, Steyerberg EW, Hunink MG, Nieman K, Galema TW, Mollet NR, et al. Prediction model to estimate presence of coronary artery disease: retrospective pooled analysis of existing cohorts. *s. BMJ* 2012;344:e3485.
  37. Reeh J, Thermaning CB, Heitmann M, Hojberg S, Sorum C, Bech J, et al. Prediction of obstructive coronary artery disease and prognosis in patients with suspected stable angina. *Eur Heart J* 2018;40:1426-35.
  38. Versteyleen MO, Joosen IA, Shaw LJ, Narula J, Hofstra L. Comparison of Framingham, PROCAM, SCORE, and Diamond Forrester to predict coronary atherosclerosis and cardiovascular events. *J Nucl Cardiol* 2011;18:904-911.



39. Jensen JM, Voss M, Hansen VB, Andersen LK, Johansen PB, Munkholm H, Norgaard BL. Risk stratification of patients suspected of coronary artery disease: comparison of five different models. *Atherosclerosis* 2012;220:557-562
40. Medakovic P, Biloglav Z, Padjen I, Pristas I, Jukic M, Zuvela F, et al. Quantification of coronary atherosclerotic burden with coronary computed tomography angiography: adapted Leaman score in Croatian patients. *Int J Cardiovasc Imaging* 2018; 34(10):1647–55.
41. Dores H, de Araújo Gonçalves P, Carvalho MS, Sousa PJ, Ferreira A, Cardim N, et al. Body mass index as a predictor of the presence but not the severity of coronary artery disease evaluated by cardiac computed tomography. *Eur J Prev Cardiol.* 2014; 21(11):1387–93.
42. Kosuge M, Kimura K, Kojima S, Sakamoto T, Ishihara M, Asada Y, et al. Impact of body mass index on in-hospital outcomes after percutaneous coronary intervention for ST segment elevation acute myocardial infarction. *Circ J.* 2008;72:521–25.
43. Mehta L, Devlin W, McCullough PA, O'Neill WW, Skelding KA, Stone GW, et al. Impact of body mass index on outcomes after percutaneous coronary intervention in patients with acute myocardial infarction. *Am J Cardiol.* 2007;99:906–10.
44. Gruberg L, Weissman NJ, Waksman R, Fuchs S, Deible R, Pinnow EE, et al. The impact of obesity on the short-term and long-term outcomes after percutaneous coronary intervention: the obesity paradox? *J Am Coll Cardiol.* 2002; 39:578–84.
45. Powell BD, Lennon RJ, Lerman A, Bell MR, Berger PB, Higano ST, et al. Association of body mass index with outcome after percutaneous coronary intervention. *Am J Cardiol.* 2003;91:472–76
46. Xia JY, Lloyd-Jones DM, Khan SS. Association of body mass index with mortality in cardiovascular disease: new insights into the obesity paradox from multiple perspectives. *Trends Cardiovasc Med* 2018; 29: 220–25.
47. Carbone S, Canada JM, Billingsley HE, et al. Obesity paradox in cardiovascular disease: where do we stand? *Vasc. Health Risk Manag.* 2019; 15:89–100.

## FIGURE LEGENDS

Fig. 1- MPR (multiplanar reconstruction) images showing different degrees of coronary artery stenosis (yellow arrows): a. normal RCA without any plaque or stenosis (CAD-RADS 0), b. small calcified plaque in the proximal LAD with minimal luminal narrowing < 25% (CAD-RADS 1), c. calcified plaque in the proximal LAD with 25-49% diameter stenosis (CAD-RADS 2), d. semi-circumferential calcified plaque in the proximal LAD with 50-69% diameter stenosis (CAD-RADS 3), e. non-calcified plaque in the proximal RCA with 70-99% diameter stenosis (CAD-RADS 4), f. total occlusion of proximal and mid LAD; calcified plaques above and beyond it supports the diagnosis of chronic total occlusion (CAD-RADS 5)

**Table 1. Univariate analysis for the association between cardiovascular risk factors and obstructive CAD classified using CAD-RADS categories**

| Variable          | Value  | CAD-RADS score 0-2 (stenosis<50%) | CAD-RADS score 3-5 (stenosis≥50%) | p value |
|-------------------|--------|-----------------------------------|-----------------------------------|---------|
| Age               |        | 55.41 ± 13.11                     | 63.10 ± 10.55                     | p<0.001 |
| Sex               |        |                                   |                                   | p<0.001 |
|                   | Male   | 142 (39.2%)                       | 75 (63.0%)                        |         |
|                   | Female | 214 (60.1%)                       | 44 (37.0%)                        |         |
| Hypertension      |        |                                   |                                   | p<0.001 |
|                   | Yes    | 242 (68.0%)                       | 112 (94.1%)                       |         |
|                   | No     | 114 (32.0%)                       | 7 (5.9%)                          |         |
| Dyslipidemia      |        |                                   |                                   | p<0.001 |
|                   | Yes    | 224 (62.9%)                       | 107 (89.9%)                       |         |
|                   | No     | 132 (37.01%)                      | 12 (10.1%)                        |         |
| Diabetes mellitus |        |                                   |                                   | p=0.003 |
|                   | Yes    | 58 (16.3%)                        | 34(28.6%)                         |         |
|                   | No     | 298 (83.7%)                       | 85 (71.4%)                        |         |
| Obesity           |        |                                   |                                   | p=0.93  |
|                   | Yes    | 151 (42.4%)                       | 50 (42.0%)                        |         |
|                   | No     | 205 (57.6%)                       | 69 (58.0%)                        |         |
| Smoking           |        |                                   |                                   | p<0.001 |
|                   | Yes    | 145 (40.7%)                       | 75 (63.0%)                        |         |
|                   | No     | 211 (59.3%)                       | 44 (37.0%)                        |         |
| CACS              |        | 0.4 [0 - 39.5]                    | 433.0 [182.4 - 924.8]             | p<0.001 |

Results are presented as mean±SD, number (%) or median [25th-75th percentile]

Abbreviations: CACS: coronary artery calcium score

**Table 2. Logistic regression analysis for the association between cardiovascular risk factors and obstructive CAD (CAD-RADS score ≥3)**

| Variable          | Odds ratio (95% CI)    | p value |
|-------------------|------------------------|---------|
| Male sex          | 3.136 (1.841 – 5.341)  | <0.001  |
| Age               | 1.063 (1.036 – 1.090)  | <0.001  |
| Hypertension      | 3.493 (1.444 – 6.251)  | 0.006   |
| Dyslipidemia      | 2.648 (1.283 – 5.466)  | 0.008   |
| Diabetes mellitus | 1.207 (0.698 – 2.088)  | 0.501   |
| Smoking           | 2.112 (1.236 – 5.466 ) | 0.006   |

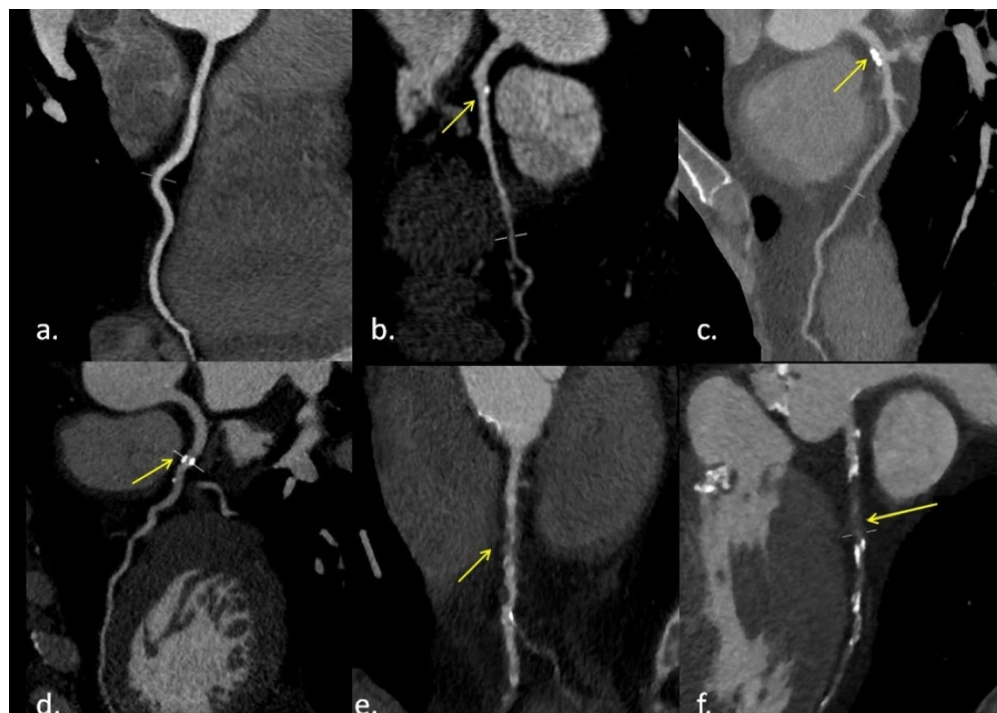

Fig. 1- MPR (multiplanar reconstruction) images showing different degrees of coronary artery stenosis (yellow arrows): a. normal RCA without any plaque or stenosis (CAD-RADS 0), b. small calcified plaque in the proximal LAD with minimal luminal narrowing < 25% (CAD-RADS 1), c. calcified plaque in the proximal LAD with 25-49% diameter stenosis (CAD-RADS 2), d. semi-circumferential calcified plaque in the proximal LAD with 50-69% diameter stenosis (CAD-RADS 3), e. non-calcified plaque in the proximal RCA with 70-99% diameter stenosis (CAD-RADS 4), f. total occlusion of proximal and mid LAD; calcified plaques above and beyond it supports the diagnosis of chronic total occlusion (CAD-RADS 5)

173x122mm (600 x 600 DPI)

**Supplementary Table 1. Baseline characteristics of the study population according to CAD-RADS categories**

| Variable              | Value                               | CAD-RADS 0<br>(n=177) | CAD-RADS 1<br>(n=99) | CAD-RADS 2<br>(n=80) | CAD-RADS 3<br>(n=67) | CAD-RADS 4<br>(n=67)       | CAD-RADS 5<br>(n=8)          | p value           |
|-----------------------|-------------------------------------|-----------------------|----------------------|----------------------|----------------------|----------------------------|------------------------------|-------------------|
| Age                   |                                     | 48.8 ± 12.1           | 60.4 ± 11.9          | 63.6 ± 8.7           | 64.6 ± 10.5          | 66.1 ± 10.6                | 64.7 ± 11.1                  | <b>p&lt;0.001</b> |
| Sex                   |                                     |                       |                      |                      |                      |                            |                              | <b>p&lt;0.001</b> |
|                       | Male (n=217)                        | 55 (31.1%)            | 42 (42.4%)           | 45 (56.2%)           | 39 (58.2%)           | 28 (63.6%)                 | 8 (100%)                     |                   |
|                       | Female(n=258)                       | 122 (68.9%)           | 57 (57.6%)           | 35 (43.8%)           | 28 (41.8 %)          | 16 (36.4%)                 | 0 (0 %)                      |                   |
| Hypertension          |                                     |                       |                      |                      |                      |                            |                              | <b>p&lt;0.001</b> |
|                       | Yes(n=354)                          | 110 (62.2%)           | 70 (70.7%)           | 62 (77.5%)           | 63 (94.0%)           | 42 (95.4%)                 | 7 (87.5%)                    |                   |
|                       | No (n=121)                          | 67(37.8%)             | 29 (29.3%)           | 18 (22.5%)           | 4 (6.0%)             | 2 (4.6%)                   | 1 (12.5%)                    |                   |
| Dyslipidemia          |                                     |                       |                      |                      |                      |                            |                              | <b>p&lt;0.001</b> |
|                       | Yes (n=331)                         | 91 (51.4%)            | 72 (72.7%)           | 61 (76.3%)           | 59 (88.1%)           | 41 (93.2%)                 | 7 (87.5%)                    |                   |
|                       | No (n=144)                          | 86 (48.6%)            | 27 (27.3%)           | 19 (23.8%)           | 8 (11.9%)            | 3(6.8%)                    | 1 (12.5%)                    |                   |
| Diabetes mellitus     |                                     |                       |                      |                      |                      |                            |                              | <b>p&lt;0.001</b> |
|                       | Yes (n=92)                          | 16 (9.0%)             | 21(21.2%)            | 21(26.2%)            | 12 (17.9%)           | 18 (40.9%)                 | 4 (50.0%)                    |                   |
|                       | No (n=383)                          | 161 (91.0%)           | 78 (78.8%)           | 59 (73.8%)           | 55 (82.1%)           | 26 (59.1%)                 | 4 (50.0%)                    |                   |
| Obesity               |                                     |                       |                      |                      |                      |                            |                              | <b>p=0.63</b>     |
|                       | Yes (n=274)                         | 68 (38.4%)            | 45 (45.4%)           | 38 (47.5%)           | 29 (43.2%)           | 19 (43.1%)                 | 2 (25.0%)                    |                   |
|                       | No (n=201)                          | 109 (61.6%)           | 54 (54.6%)           | 42 (52.5%)           | 38 (56.8%)           | 25 (56.9%)                 | 6 (75.0%)                    |                   |
| Smoking               |                                     |                       |                      |                      |                      |                            |                              | <b>p&lt;0.001</b> |
|                       | Yes (n=220)                         | 53 (30.0%)            | 44 (44.4%)           | 48 (60.0%)           | 44 (65.6%)           | 25 (56.9%)                 | 6 (75.0%)                    |                   |
|                       | No (n=255)                          | 124 (70.0%)           | 55 (55.6%)           | 32 (40.0%)           | 23 (34.4%)           | 19 (43.1%)                 | 2 (25.0%)                    |                   |
| Clinical presentation |                                     |                       |                      |                      |                      |                            |                              | <b>p&lt;0.001</b> |
|                       | Typical angina<br>(n=222)           | 60 (33.9%)            | 35 (35.3%)           | 36 (45.0%)           | 45 (67.1%)           | 39 (88.6%)                 | 7 (87.5%)                    |                   |
|                       | Atypica angina<br>(n=123)           | 70 (39.5%)            | 25 (25.2%)           | 20 (25.0%)           | 7 (10.4%)            | 1 (2.2%)                   | 0 (0 %)                      |                   |
|                       | Nonanginal<br>chest pain<br>(n=130) | 47 (26.6%)            | 39 (39.5%)           | 24 (30.0%)           | 15 (22.5%)           | 4 (9.2%)                   | 1 (12.5%)                    |                   |
| CACS                  |                                     | 0<br>[0-0]            | 15<br>[6.2-36.6]     | 123<br>[55.1-284.5]  | 303<br>[134.8-500.7] | 711.3<br>[444.7-<br>958.3] | 1611.4<br>[949.1-<br>1921.4] | <b>p&lt;0.001</b> |

Results are presented as mean±SD, number (%), or median (25th-75th percentile)

Abbreviations: CACS: coronary artery calcium score

**STROBE 2007 (v4) Statement—Checklist of items that should be included in reports of *cross-sectional studies***

| Section/Topic                | Item # | Recommendation                                                                                                                                                                       | Reported on page # |
|------------------------------|--------|--------------------------------------------------------------------------------------------------------------------------------------------------------------------------------------|--------------------|
| <b>Title and abstract</b>    | 1      | (a) Indicate the study's design with a commonly used term in the title or the abstract                                                                                               | 1                  |
|                              |        | (b) Provide in the abstract an informative and balanced summary of what was done and what was found                                                                                  | 2                  |
| <b>Introduction</b>          |        |                                                                                                                                                                                      |                    |
| Background/rationale         | 2      | Explain the scientific background and rationale for the investigation being reported                                                                                                 | 3,4                |
| Objectives                   | 3      | State specific objectives, including any prespecified hypotheses                                                                                                                     | 4                  |
| <b>Methods</b>               |        |                                                                                                                                                                                      |                    |
| Study design                 | 4      | Present key elements of study design early in the paper                                                                                                                              | 4                  |
| Setting                      | 5      | Describe the setting, locations, and relevant dates, including periods of recruitment, exposure, follow-up, and data collection                                                      | 4                  |
| Participants                 | 6      | (a) Give the eligibility criteria, and the sources and methods of selection of participants                                                                                          | 4                  |
| Variables                    | 7      | Clearly define all outcomes, exposures, predictors, potential confounders, and effect modifiers. Give diagnostic criteria, if applicable                                             | 5                  |
| Data sources/<br>measurement | 8*     | For each variable of interest, give sources of data and details of methods of assessment (measurement). Describe comparability of assessment methods if there is more than one group | 5                  |
| Bias                         | 9      | Describe any efforts to address potential sources of bias                                                                                                                            | 5                  |
| Study size                   | 10     | Explain how the study size was arrived at                                                                                                                                            | 5                  |
| Quantitative variables       | 11     | Explain how quantitative variables were handled in the analyses. If applicable, describe which groupings were chosen and why                                                         | 5                  |
| Statistical methods          | 12     | (a) Describe all statistical methods, including those used to control for confounding                                                                                                | 5,6                |
|                              |        | (b) Describe any methods used to examine subgroups and interactions                                                                                                                  | 5,6                |
|                              |        | (c) Explain how missing data were addressed                                                                                                                                          | 5,6                |
|                              |        | (d) If applicable, describe analytical methods taking account of sampling strategy                                                                                                   | 5,6                |
|                              |        | (e) Describe any sensitivity analyses                                                                                                                                                | 5,6                |
| <b>Results</b>               |        |                                                                                                                                                                                      |                    |

|                          |     |                                                                                                                                                                                                              |     |
|--------------------------|-----|--------------------------------------------------------------------------------------------------------------------------------------------------------------------------------------------------------------|-----|
| Participants             | 13* | (a) Report numbers of individuals at each stage of study—eg numbers potentially eligible, examined for eligibility, confirmed eligible, included in the study, completing follow-up, and analysed            | 6   |
|                          |     | (b) Give reasons for non-participation at each stage                                                                                                                                                         | 6   |
|                          |     | (c) Consider use of a flow diagram                                                                                                                                                                           | 6   |
| Descriptive data         | 14* | (a) Give characteristics of study participants (eg demographic, clinical, social) and information on exposures and potential confounders                                                                     | 6   |
|                          |     | (b) Indicate number of participants with missing data for each variable of interest                                                                                                                          | 6   |
| Outcome data             | 15* | Report numbers of outcome events or summary measures                                                                                                                                                         | 6,7 |
| Main results             | 16  | (a) Give unadjusted estimates and, if applicable, confounder-adjusted estimates and their precision (eg, 95% confidence interval). Make clear which confounders were adjusted for and why they were included | 6,7 |
|                          |     | (b) Report category boundaries when continuous variables were categorized                                                                                                                                    | 6,7 |
|                          |     | (c) If relevant, consider translating estimates of relative risk into absolute risk for a meaningful time period                                                                                             |     |
| Other analyses           | 17  | Report other analyses done—eg analyses of subgroups and interactions, and sensitivity analyses                                                                                                               | 6,7 |
| <b>Discussion</b>        |     |                                                                                                                                                                                                              |     |
| Key results              | 18  | Summarise key results with reference to study objectives                                                                                                                                                     | 8,9 |
| Limitations              | 19  | Discuss limitations of the study, taking into account sources of potential bias or imprecision. Discuss both direction and magnitude of any potential bias                                                   | 9   |
| Interpretation           | 20  | Give a cautious overall interpretation of results considering objectives, limitations, multiplicity of analyses, results from similar studies, and other relevant evidence                                   | 8,9 |
| Generalisability         | 21  | Discuss the generalisability (external validity) of the study results                                                                                                                                        | 8,9 |
| <b>Other information</b> |     |                                                                                                                                                                                                              |     |
| Funding                  | 22  | Give the source of funding and the role of the funders for the present study and, if applicable, for the original study on which the present article is based                                                | 10  |

\*Give information separately for cases and controls in case-control studies and, if applicable, for exposed and unexposed groups in cohort and cross-sectional studies.

**Note:** An Explanation and Elaboration article discusses each checklist item and gives methodological background and published examples of transparent reporting. The STROBE checklist is best used in conjunction with this article (freely available on the Web sites of PLoS Medicine at <http://www.plosmedicine.org/>, Annals of Internal Medicine at <http://www.annals.org/>, and Epidemiology at <http://www.epidem.com/>). Information on the STROBE Initiative is available at [www.strobe-statement.org](http://www.strobe-statement.org).

# BMJ Open

## Association between cardiovascular risk factors and coronary artery disease assessed using CAD-RADS classification: a cross-sectional study in Romanian population

|                                 |                                                                                                                                                                                                                                                                                                                                                                                                                                                                                                                                                                                                                                                                                                                                                                                                                                                                                                                                                                                                                                                                   |
|---------------------------------|-------------------------------------------------------------------------------------------------------------------------------------------------------------------------------------------------------------------------------------------------------------------------------------------------------------------------------------------------------------------------------------------------------------------------------------------------------------------------------------------------------------------------------------------------------------------------------------------------------------------------------------------------------------------------------------------------------------------------------------------------------------------------------------------------------------------------------------------------------------------------------------------------------------------------------------------------------------------------------------------------------------------------------------------------------------------|
| Journal:                        | <i>BMJ Open</i>                                                                                                                                                                                                                                                                                                                                                                                                                                                                                                                                                                                                                                                                                                                                                                                                                                                                                                                                                                                                                                                   |
| Manuscript ID                   | bmjopen-2019-031799.R3                                                                                                                                                                                                                                                                                                                                                                                                                                                                                                                                                                                                                                                                                                                                                                                                                                                                                                                                                                                                                                            |
| Article Type:                   | Original research                                                                                                                                                                                                                                                                                                                                                                                                                                                                                                                                                                                                                                                                                                                                                                                                                                                                                                                                                                                                                                                 |
| Date Submitted by the Author:   | 13-Dec-2019                                                                                                                                                                                                                                                                                                                                                                                                                                                                                                                                                                                                                                                                                                                                                                                                                                                                                                                                                                                                                                                       |
| Complete List of Authors:       | Popa, Loredana; University of Medicine and Pharmacy Targu Mures, Radiology; Hiperdia-Affidea Imaging Center<br>Petresc, Bianca; Cluj-Napoca County Emergency Hospital, Radiology<br>Cătană, Cristina; Cluj-Napoca County Emergency Hospital, Radiology<br>Moldovanu, Claudia; Cluj-Napoca County Emergency Hospital, Radiology<br>Feier, Diana; Iuliu Hațieganu University of Medicine and Pharmacy; Hiperdia-Affidea Imaging Center, Radiology<br>Lebovici, Andrei; Iuliu Hațieganu University of Medicine and Pharmacy, Radiology; Hiperdia-Affidea Imaging Center, Radiology<br>Schiau, Călin; Iuliu Hațieganu University of Medicine and Pharmacy, Radiology<br>Rancea, Raluca; Heart Institute Niculae Stancioiu Cluj-Napoca, Cardiology<br>Molnar, Adrian; Heart Institute Niculae Stancioiu Cluj-Napoca, Cardiovascular Surgery; Iuliu Hațieganu University of Medicine and Pharmacy, Cardiovascular and Thoracic Surgery<br>Buruian, Mircea; University of Medicine and Pharmacy Targu Mures, Radiology; Emergency County Hospital Targu-Mures, Radiology |
| <b>Primary Subject Heading</b>: | Cardiovascular medicine                                                                                                                                                                                                                                                                                                                                                                                                                                                                                                                                                                                                                                                                                                                                                                                                                                                                                                                                                                                                                                           |
| Secondary Subject Heading:      | Radiology and imaging                                                                                                                                                                                                                                                                                                                                                                                                                                                                                                                                                                                                                                                                                                                                                                                                                                                                                                                                                                                                                                             |
| Keywords:                       | coronary artery disease, coronary CT angiography, CAD-RADS, cardiovascular risk factors                                                                                                                                                                                                                                                                                                                                                                                                                                                                                                                                                                                                                                                                                                                                                                                                                                                                                                                                                                           |
|                                 |                                                                                                                                                                                                                                                                                                                                                                                                                                                                                                                                                                                                                                                                                                                                                                                                                                                                                                                                                                                                                                                                   |

SCHOLARONE™  
Manuscripts

# Association between cardiovascular risk factors and coronary artery disease assessed using CAD-RADS classification: a cross-sectional study in Romanian population

## Authors:

Loredana Elisabeta Popa<sup>1,2</sup>, Bianca Petresc<sup>3</sup>, Cristina Cătană<sup>3</sup>, Claudia Gabriela Moldovanu<sup>3</sup>, Diana-Sorina Feier<sup>2,3,4</sup>, Andrei Lebovici<sup>2,3,4</sup>, Călin Schiau<sup>4</sup>, Raluca Alina Rancea<sup>5</sup>, Adrian Molnar<sup>6,7</sup>, Mircea Marian Buruian<sup>1,8</sup>

## Affiliations:

1. Department of Radiology, University of Medicine and Pharmacy Targu Mures  
Address: Gh. Marinescu Street, nr. 50, 540136, Targu Mures, Romania
2. Department of Radiology, Hiperdia-Affidea Imaging Center Cluj-Napoca  
Address: Republicii Street, nr. 105A, 400000, Cluj-Napoca, Romania
3. Department of Radiology, County Emergency Hospital Cluj-Napoca  
Address: Clinicilor Street, nr. 1-3, 400006, Cluj-Napoca, Romania
4. Department of Radiology, “Iuliu Hațieganu” University of Medicine and Pharmacy, Cluj-Napoca, Romania  
Address: Clinicilor Street, nr. 1-3, 400006, Cluj-Napoca, Romania
5. Department of Cardiology, Heart Institute “Nicolae Stancioiu” Cluj-Napoca  
Address: Motilor Street, nr. 19-21, 400001 Cluj-Napoca, Romania
6. Department of Cardiovascular Surgery, Heart Institute “Nicolae Stancioiu” Cluj-Napoca Romania  
Address: Motilor Street, nr. 19-21, 400001 Cluj-Napoca, Romania
7. Department of Cardiovascular and Thoracic Surgery Surgery, “Iuliu Hațieganu” University of Medicine and Pharmacy, Cluj-Napoca, Romania  
Address: Motilor Street, nr. 19-21, 400001 Cluj-Napoca, Romania
8. Department of Radiology, Emergency County Hospital Targu Mures  
Address: Gh. Marinescu Street, nr. 50, 540136, Targu Mures, Romania

## Corresponding Author:

Bianca Petresc

Email: bianca.petresc@gmail.com

Phone: +40734714327

Address: Department of Radiology, County Emergency Hospital Cluj-Napoca, Clinicilor Street, nr. 1-3, 400006, Cluj-Napoca, Romania

ORCID: 0000-0003-2167-9350



## Abstract

**Objectives:** This study aimed to evaluate the association between cardiovascular risk factors and CAD-RADS score in the Romanian population. CAD-RADS is a new, standardized method to assess coronary artery disease (CAD) using coronary computed tomography angiography (CCTA).

**Design:** A cross-sectional observational, patient-based study.

**Setting:** Referred imaging center for coronary artery disease in Transylvania, Romania.

**Participants:** We retrospectively reviewed 674 patients who underwent CCTA between January 2017 and August 2018. The exclusion criteria included: previously known CAD, defined as prior myocardial infarction, percutaneous coronary intervention or coronary artery bypass graft surgery (n=91), cardiac CT for other than evaluation of possible CAD (n=85), significant arrhythmias compromising imaging quality (n=23). Finally, 475 patients fulfilled the inclusion criteria.

**Methods:** Demographical, clinical and CCTA characteristics of the patients were obtained. Coronary artery disease was evaluated using CAD-RADS score. Obstructive CAD was defined as  $\geq 50\%$  stenosis of  $\geq 1$  coronary segment on CCTA.

**Results:** We evaluated the association between risk factors and CAD-RADS score in univariate and multivariable analysis. We divided the patients into 2 groups according to the CAD-RADS system: group 1: CAD-RADS score between 0-2 (stenosis  $< 50\%$ ) and group 2: CAD-RADS score  $\geq 3$  (stenosis  $\geq 50\%$ ). On univariate analysis, male gender, age, hypertension, dyslipidemia, smoking and diabetes mellitus were positively associated with a CAD-RADS score  $\geq 3$ . The multivariate analysis showed that male sex, age, dyslipidemia, hypertension and smoking were independently associated with obstructive CAD.

**Conclusion:** This study demonstrated a significant association between multiple cardiovascular risk factors and a higher coronary atherosclerotic burden assessed using CAD-RADS system in the Romanian population.

**Keywords:** coronary artery disease; coronary CT angiography; CAD-RADS; cardiovascular risk factors

## Article Summary

### Strengths and limitations of this study

- This is the first study to evaluate the association of cardiovascular risk factors and coronary artery disease assessed using coronary CT angiography in Romania.
- We quantified the coronary artery stenosis using the CAD-RADS classification, the newest, standardized method for reporting CAD.
- The patients were recruited from a single center; therefore, the study population was relatively small.
- Another limitation is the design of the study: a cross-sectional, retrospective one.

### Introduction

Coronary artery disease (CAD) is one of the major causes of morbidity and mortality worldwide. Even though CAD mortality rates have declined since 1980s, it still accounts for approximately one-third of all deaths of individuals aged over 35 years old (1,2).

It is well-known that atherosclerosis is the underlying cause of cardiovascular diseases and multiple risk factors augment the atherosclerotic process. These risk factors include non-modifiable ones such as age and sex and modifiable risk factors such as hypertension, dyslipidemia, obesity, diabetes mellitus and smoking (3-7). Studies suggest that the majority of patients with CAD have at least one modifiable risk factor and their presence has an impactful role in the progression of CAD (8, 9). Many risk-scoring systems have been developed such as Framingham and SCORE which are based on the presence of various traditional cardiovascular risk factors (10, 11). Assessment of comorbidities and lifestyle together with basic laboratory investigations are recommended as step 2 and step 3 in the approach of patients with angina and suspected CAD (12). After identifying the potential cardiovascular risk factors and establishing the pretest probability and clinical likelihood of coronary artery disease, the next step is to select the appropriate tests for the diagnosis of CAD (12).

With the recent advancements made in medical technology, coronary CT angiography (CCTA) has rapidly evolved into one of the most highly accurate methods for diagnosis and evaluation of CAD. It is a unique non-invasive test which can provide direct and accurate visualization of the coronary vessel lumen, being able to quantify the presence and extent of coronary stenosis and to assess the characteristics of coronary atherosclerotic plaques (13).

In the latest ESC guideline for the diagnosis and management of chronic coronary syndromes, CCTA has been categorized as class I recommendation for diagnosing CAD in symptomatic patients in whom obstructive CAD cannot be excluded by clinical assessment alone. Also, it can be considered as an alternative investigation to invasive angiography if another non-invasive test is equivocal or non-diagnostic (12).

In 2016, the Society of Cardiovascular Computed Tomography published the CAD-RADS grading system, which is a standardized reporting method of CCTA results. This is meant to

1  
2  
3 facilitate communication of the results along with suggestions for consecutive management of the  
4 patients. The grading system ranges from 0 to 5, where CAD-RADS 0 score means a complete  
5 absence of stenosis and CAD-RADS 5 represents total occlusion of at least 1 coronary segment  
6 (14).  
7  
8

9 Among European countries, Romania is one of the leading countries regarding the CVD  
10 mortality burden, having the second highest standardized death rate caused by ischemic heart  
11 disease (15). Also, the prevalence of cardiovascular risk factors is relatively high in our country.  
12 Romania is on the fourth place in Europe concerning raised blood pressure, on the 8<sup>th</sup> place  
13 regarding the presence of diabetes mellitus (16, 17) and an increasing trend in the incidence of  
14 obesity (18).  
15  
16

17 The aim of this study is to evaluate the association between traditional cardiovascular risk factors  
18 and coronary artery disease evaluated using the CAD-RADS score in the Romanian population.  
19  
20

## 21 **Methods**

### 22 *Study population*

23 We retrospectively reviewed 674 consecutive patients who underwent CCTA between January  
24 2017 and August 2018 in our institution. The indications for CCTA were: atypical angina, typical  
25 angina with an inconclusive stress test, patients with intermediate/high-risk for major cardiac  
26 events. The exclusion criteria included: previously known CAD, defined as prior myocardial  
27 infarction, percutaneous coronary intervention or coronary artery bypass graft surgery (n=91),  
28 cardiac CT for other than evaluation of possible CAD (n=85), significant arrhythmias  
29 compromising imaging quality (n=23). Besides these exclusion criteria, patients with renal  
30 failure, documented contrast allergy or pregnant women did not perform the CT examination.  
31 Finally, 475 patients fulfilled the inclusion criteria.  
32  
33

### 34 *Scan protocol*

35 All CCTA scans were performed with a 64-sliced multi-detector CT (Sensation 64, Siemens,  
36 Forchheim, Germany). The scanning parameters were: slices/collimation 64/0.6 mm, tube voltage  
37 120 kv, 850 mAs, gantry rotation time 330 ms, pitch 0.2, effective slice thickness 0.75 mm and  
38 reconstruction increment 0.4 mm. Patients with a heart-rate > 70 bpm received premedication  
39 with oral beta-blockers 1 hour prior to the examination. Short-acting nitroglycerine sublingual  
40 spray was administered to all patients for coronary vasodilatation.  
41  
42

43 First, a non-contrast enhanced scan was performed in order to assess the coronary artery calcium  
44 score (CACS), followed by the coronary computed tomography angiography (CCTA) to evaluate  
45 the coronary artery lumen and to characterize the atherosclerotic plaques. A bolus of 80 ml of  
46 iodinated contrast medium was administered intravenously at 5 ml/sec, followed by 40 ml of  
47 saline injected at the same rate. After the acquisition, the images were transferred to a dedicated  
48  
49

workstation for post-processing, which included multiplanar reconstructions (MPR), maximum intensity projections (MIP) and volume rendering images (VRT).

### ***Coronary artery analysis***

All CCTA images were assessed by an experienced radiologist who was blinded to the study (LE.P.). CACS was calculated using a semi-automatically software, according to the Agatston method. Plaque composition was classified as: calcified, non-calcified or mixed, with calcified coronary plaque being defined as any structure with a density  $\geq 130$  HU.

Coronary atherosclerotic lesions were quantified for stenosis by visual estimation. We evaluated only the coronary segments with a diameter greater than 1.5 mm.

Every patient received a final CAD-RADS score based on the extent of coronary stenosis (Figure 1). CAD-RADS score of 0 was assigned if there was a total absence of coronary plaques or stenosis. Minimal coronary stenosis between 1-24% was considered CAD-RADS 1. CAD-RADS score 2 was given when there was a mild stenosis between 25-49%. CAD-RADS score of 3 corresponded to a moderate stenosis between 50-69%. CAD-RADS score of 4 was assigned if there was a single coronary stenosis between 70-99% or if the left main artery was depicted with a stenosis of more than 50%. Also, CAD-RADS score of 4 was given in the situation of 3-vessel obstructive disease, when there were stenosis of more than 70% involving all the three coronary arteries (left anterior descending artery, circumflex artery and right coronary artery). If total occlusion was identified in at least one coronary segment, a CAD-RADS score of 5 was assigned.

Obstructive CAD was defined as  $\geq 50\%$  stenosis of  $\geq 1$  coronary segments on CCTA.

### ***Cardiovascular risk factors***

Prior to CCTA, a detailed medical history with the risk factors was obtained from all patients. Hypertension was defined as blood pressure  $\geq 140/90$  mm Hg or treatment with antihypertensive medications (19). Dyslipidemia was defined as a total cholesterol level  $\geq 5$  mmol/L (20) or treatment with lipid-lowering medications. Diabetes mellitus was defined as fasting plasma glucose  $\geq 126$  mg/dl or the use of insulin or oral antidiabetic agents. Obesity was defined as body mass index (BMI)  $\geq 30$  kg/m<sup>2</sup>. Self-reported smoking status was obtained by a query regarding both current and previous smoking history. Classification of symptoms (typical angina, atypical angina, non-anginal pain) was judged by cardiologists using patient interviews conducted prior to the CT examination.

### ***Statistical analysis***

Categorical variables were presented as numbers and percentages. Continuous variables with normal distribution were expressed as means  $\pm$  standard deviation, those with non-normal distribution as median with interquartile range. Normality was tested with the Kolmogorov-Smirnov test.

1  
2  
3 Differences between CAD-RADS groups were evaluated using one-way analysis of variance  
4 (ANOVA) for continuous variables and  $\chi^2$  test for categorical variables. Whenever the  
5 distribution of continuous data was not normal, non-parametric Kruskal-Wallis test was used for  
6 comparison.  
7  
8

9 Cardiovascular risk factors that showed a significant association with the CAD-RADS score were  
10 included in multivariable logistic regression analysis in order to evaluate their simultaneous  
11 influence. Through logistic regression analysis, independent relationship between cardiovascular  
12 risk factors and obstructive CAD (CAD-RADS score  $\geq 3$ ) was identified.  
13  
14

15 For all comparisons, a p value of  $<0.05$  was considered statistically significant. The statistical  
16 analysis was performed using commercially available software (MedCalc for Windows, version  
17 14.8, MedCalc Software, Ostend, Belgium).  
18  
19

### 20 ***Patient and Public Involvement***

21 There was no involvement of patients and/or public in this study.  
22  
23

## 24 **Results**

### 25 ***Baseline characteristics of the study population***

26  
27 The clinical and angiographic characteristics of our study population according to the CAD-  
28 RADS classification are shown in Supplementary Table 1. Among the 475 patients included in  
29 this study, the mean age was  $57.8 \pm 13.2$  years and the majority of them were females: 54.4%.  
30 There was a high prevalence of both hypertensive (74.5%) and dyslipidemic (69.7%) patients.  
31 The percentage of diabetic patients was relatively small, with only 19.3% individuals having this  
32 condition. Smoking was reported among 46.3% of the study group. The majority of the patients  
33 were symptomatic, 72.6 % presenting with either typical or atypical angina.  
34  
35  
36  
37  
38

39 When we classified the patients according to the CAD-RADS score, 177 of them had CAD-  
40 RADS score=0, 99 patients had CAD-RADS score=1 while 80 patients CAD-RADS score=2. A  
41 percentage of 14.1% of people included in this study were diagnosed with CAD-RADS 3 score.  
42 Finally, 9.3% patients had severe stenosis, with a CAD-RADS score of 4 and 8 patients had total  
43 occlusion of a coronary segment (CAD-RADS score=5).  
44  
45

46 Patient gender, age, the presence of hypertension, dyslipidemia, diabetes mellitus as well as  
47 clinical presentation and coronary artery calcium score were significantly different across CAD-  
48 RADS scores ( $p < 0.0001$  for all comparisons) (Supplementary Table 1). However, our results  
49 did not reveal any association between obesity and different CAD-RADS scores ( $p=0.63$ )  
50 (Supplementary Table 1).  
51  
52  
53  
54  
55  
56  
57  
58  
59  
60

### ***CAD-RADS score and multiple cardiovascular risk factors***

Using the cardiovascular risk factors mentioned above, we tested if there is any association regarding their presence and obstructive coronary artery disease, defined as coronary stenosis  $\geq 50\%$  and equivalent with a CAD-RADS score  $\geq 3$  (Table 1).

Our results show that a CAD-RADS score between 0-2 was more frequent in younger patients, with a mean age of  $55.41 \pm 13.11$  years in this subgroup, while patients with CAD-RADS score  $\geq 3$  had a higher mean age of  $63.1 \pm 10.55$  years (Table 1). Regarding gender, patients with CAD-RADS scores higher than 3 were more frequently males. The majority of the female patients (82.9%) received a CAD-RADS score of 0, 1 or 2 (Table 1).

Our findings indicated a positive association between systolic hypertension and CAD-RADS score, with over 90% of the patients with moderate/severe stenosis (CAD-RADS  $\geq 3$ ) being hypertensive (Table 1). Moreover, based on our results, patients with CAD-RADS scores  $\geq 3$  had a greater frequency of dyslipidemia, with more than 85% patients in these categories being also dyslipidemic (Table 1).

Furthermore, the proportion of smokers was larger among patients identified with higher CAD-RADS scores: almost two-third of the patients who received a CAD-RADS score  $\geq 3$  admitted the use of cigarettes (Table 1). On the other hand, in the CAD-RADS groups of 0, 1 and 2 the percentage of the smokers was less than 50% (Table 1).

Regarding the association between diabetes mellitus and CAD-RADS score, our results show increasing percents of diabetic individuals proportional with higher CAD-RADS scores: from 16.3% diabetic patients with CAD-RADS scores of 0-2 to 28.6% diabetic patients with CAD-RADS scores  $\geq 3$  (Table 1). However, the percentage of obese patients did not differ significantly among different CAD-RADS groups (Table 1).

### ***Multivariable analysis***

According to the multivariable analysis, male sex, age, hypertension, dyslipidemia and smoking remained independently associated with obstructive CAD defined as CAD-RADS score  $\geq 3$  (Table 2). Males had more than 3 times higher odds of developing significant coronary stenosis. The odds ratio for coronary stenosis  $\geq 50\%$  was approximately 3.5-fold greater in hypertensive individuals. Our results showed that having dyslipidemia significantly increased the odds of moderate/severe coronary stenosis by more than 2.5 times. Last but not least, smoking was associated with increased odds of having CAD-RADS score  $\geq 3$  by approximately 2 times.

## **Discussion**

Romania is one of the high cardiovascular risk European countries according to data from the last European Society of Cardiology guideline for prevention of CVD (3). There are only a limited number of national epidemiological studies which estimate the prevalence and future trends of

1  
2  
3 cardiovascular risk factors in the Romanian population. (21-25). The latest study from 2017,  
4 Sephar III, shows an increasing trend regarding the majority of cardiovascular risk factors in our  
5 population (23). The prevalence of hypertension increased from 40.4% in 2011 to 45.1% in 2016  
6 (22, 23). Moreover, the percentage of Romanians diagnosed with dyslipidemia is alarmingly  
7 high, reaching 77.3% in 2016, with 53.4% newly diagnosed cases (23). Furthermore, the  
8 prevalence of diabetes mellitus, another important risk factor for coronary artery disease, is  
9 12.4% (24), a relatively high percentage that puts Romania on the 8th place in Europe regarding  
10 this medical condition (16). Overweight and obesity represent another medical issue encountered  
11 in our country. Both PREDATORR and Sephar III studies (23, 25) reported a prevalence of over  
12 30% of obese patients based on BMI index, similar to the data from WHO database which shows  
13 an increasing trend of obesity in our country over the last 40 years (18). Last but not least,  
14 smoking can be considered another cause for the high incidence of cardiovascular disease in our  
15 country. Even if there is a decreasing trend regarding this habit in our country, Romania still  
16 occupies one of the leading places in European Union, with 28% of individuals reporting the use  
17 of cigarettes, a number higher than the average European percentage: 26% (26). According to the  
18 data by the National Institute for Public Health in Romania, tobacco is attributed to 16.3% CVD-  
19 Related deaths in Romania. (27).  
20  
21  
22  
23

24 In Europe, Romania records one of the greatest incidences of cardiovascular diseases, according  
25 to the latest statistics offered by EuroStat in 2018 (15). Our country occupies the second place in  
26 Europe regarding the percent of total deaths caused by diseases of the circulatory system (15).  
27 Concerning the standardized death rates caused by ischemic heart disease, Romania is also one of  
28 the leading countries, being on the 6th and 5th place in deaths of men and women respectively  
29 (15).  
30

31 CAD-RADS is a standardized radiological reporting system dating since 2016 and there are only  
32 a few studies published in the area of cardiac imaging using the CAD-RADS score (28-32). It is  
33 used to quantify coronary artery stenosis in patients with suspected or known coronary artery  
34 disease in order to provide a basis for further investigation, diagnosis, management and  
35 treatment, substantially reducing human error and improving data integrity (14).  
36  
37  
38

39 To the best of our knowledge, our study is the first one to evaluate the association between  
40 multiple associations of cardiovascular risk factors and the severity of coronary artery disease  
41 assessed on CCTA and evaluated using CAD-RADS classification in the Romanian population.  
42

43 The association between cardiovascular risk factors and cardiovascular events was first  
44 demonstrated by the Framingham study through an epidemiological approach (33). The  
45 INTERHEART study showed that the cumulative effect of risk factors increased the risk of CAD,  
46 especially of myocardial infarction worldwide, in both sexes and all ages worldwide (34).  
47  
48

49 Our research reports that male sex, age, dyslipidemia, hypertension and smoking are significantly  
50 associated with obstructive CAD defined as CAD-RADS score  $\geq 3$ , with the prevalence being  
51 increased by a cumulative effect on them.  
52

53 Male sex and age are well-known risk factors for coronary atherosclerosis, being used in  
54 prediction models for the estimation of pretest probability of developing coronary artery disease  
55 (12, 35). Among medical risk factors, our study showed that hypertension and dyslipidemia were  
56  
57

1  
2  
3 positively associated with CAD-RADS score  $\geq 3$  in both univariate and multivariable analyses.  
4 Our results are in concordance with the latest data from European Heart Network which shows  
5 that systolic blood pressure and total cholesterol levels are the determinants with the greatest  
6 contribution to CVD mortality (17). Also, these two factors are included in the widely used  
7 SCORE charts (3) and there are many clinical models that add them for increasing the probability  
8 of obstructive CAD (36-39).  
9

10  
11 Our multivariable analysis did not find an association between diabetes mellitus and obstructive  
12 CAD, one possible explanation being that only 19.3% of our study group had diabetes as their  
13 comorbidity.  
14

15  
16 Also, we did not find a direct association between obesity and coronary artery burden defined by  
17 CAD-RADS score. Our study is in concordance with Medakovic et al (40) and Dores H et al  
18 (41). According to Dores H et al, obesity assessed by BMI can be an indicator of the presence of  
19 CAD, but not necessarily associated with its severity (41). They also described an “obesity  
20 paradox” with better outcomes after percutaneous coronary interventions at patients with a higher  
21 BMI (41). One hypothesis for this paradox is that obese patients tend to be diagnosed at an earlier  
22 age and stage of CAD, therefore having lower morbidity and mortality rates (42, 43). Another  
23 potential reason for better outcomes of obese patients compared to those of underweight ones is  
24 that the latter group is more likely to have post procedural complications due to excessive  
25 anticoagulation which is usually not weight adjusted (44, 45). Moreover, underweight patients  
26 usually have more concomitant comorbidities which lead to worse prognosis (46). Another theory  
27 is that obesity is associated with higher amounts of lean mass and which can have a protective  
28 effect when not associated with increased systemic inflammation (47).  
29  
30

31  
32 Finally, our findings show that smoking is an independent risk factor for the presence of  
33 obstructive coronary disease, this being also one of the behavioral factors with the highest  
34 contribution for CVD mortality and morbidity rates across Europe (17).  
35  
36

### 37 **Limitations of the study**

38

39 Our study has several limitations, the most important one being the fact that it is a retrospectively  
40 conducted one. Secondary, our results were confined to the experience of a single medical center  
41 and the findings of this study were based on a relatively small patient population. Regarding the  
42 risk factors, dyslipidemia was not analyzed by fractions of the cholesterol: LDL-C and HDL-C.  
43 Also, we did not analyze other additional risk factors like alcohol use, physical activity,  
44 anthropometric measurements or C-reactive protein levels. Taking the retrospective approach into  
45 consideration, our research assess only the association between traditionally known cardiovascular  
46 risk factors and coronary stenosis evaluated by CAD-RADS score and does not assess the  
47 incidence of major cardiac events after performing the CT angiography.  
48  
49  
50  
51  
52  
53  
54  
55  
56  
57



## Conclusion

In conclusion, our study demonstrates that there is a significant association between multiple cardiovascular risk factors and a higher coronary atherosclerotic burden assessed using CAD-RADS score in the Romanian population. Considering CAD as a priority for Romanian healthcare system, our study provides an overview of imaging and clinical characteristics of CAD and their association, offering valuable information for both cardiologists and radiologists in order to improve the management of the patients.

### Author contributions:

- Conception (constructing the idea for research): Loredana E. Popa, Mircea M. Buruian
- Design (planning methodology to reach the conclusion): Loredana E. Popa, Diana Feier, Andrei Lebovici, Raluca Rancea
- Supervision (organising and supervising the course of the project): Loredana E. Popa, Mircea M. Buruian, Adrian Molnar
- Data Collection and Processing: Raluca Rancea, Calin Schiau, Cristina Catana, Claudia G. Moldovanu, Bianca Petresc
- Analysis and interpretation: Bianca Petresc, Diana Feier
- Literature Review: Bianca Petresc, Calin Schiau, Cristina Catana, Claudia G. Moldovanu
- Writing of the manuscript: Loredana E. Popa, Bianca Petresc, Cristina Catana, Claudia G. Moldovanu
- Critical Review: Adrian Molnar, Andrei Lebovici, Diana Feier, Mircea M. Buruian

**Acknowledgements:** None.

**Funding:** This research received no specific grant from any funding agency in the public, commercial or not-for-profit sectors.

**Competing interest:** None declared.

**Ethics approval:** The study was approved by the Ethics Committees of University of Medicine and Pharmacy “Iuliu Hatieganu” Cluj-Napoca (455/19.12.2018) and University of Medicine and Pharmacy Targu Mures (272/21.11.2018). The Institutional Review Board approved this retrospective, HIPAA-compliant study and waived written informed consent. (1339/25.09.2018)

**Patient consent for publication:** Not required.

**Data sharing statement:** Deidentified participant data are available upon request through the corresponding author BP. ORCID identifier 0000-0003-2167-9350.

## References

1. Timmis A, Townsend N, Gale C, Grobbee R, Maniadakis N, Flather M, et al. European society of cardiology: cardiovascular disease statistics 2017. *Eur Heart J.* 2018; 39:508–79.
2. Moran AE, Forouzanfar MH, Roth GA, Mensah GA, Ezzati M, Murray CJ, Naghavi M. Temporal trends in ischemic heart disease mortality in 21 world regions, 1980 to 2010: the Global Burden of Disease 2010 study. *Circulation* 2014 129(14):1483-92.
3. Piepoli MF, Hoes AW, Agewall S, Albus C, Brotons C, Catapano A, et al. 2016 European Guidelines on cardiovascular disease prevention in clinical practice: The Sixth Joint Task Force of the European Society of Cardiology and Other Societies on Cardiovascular Disease Prevention in Clinical Practice (constituted by representatives of 10 societies and by invited experts) Developed with the special contribution of the European Association for Cardiovascular Prevention & Rehabilitation (EACPR). *Eur Heart J.* 2016; 37(29):2315-81.
4. Rivera JJ, Nasir K, Cox PR, Choi EK, Yoon Y, Cho I, et al. Association of traditional cardiovascular risk factors with coronary plaque sub-types assessed by 64-slice computed tomography angiography in a large cohort of asymptomatic subjects. *Atherosclerosis* 2009;206:451–57.
5. Rapsomaniki E, Timmis A, George J, Pujades-Rodriguez M, Shah AD, Denaxas S, et al. Blood pressure and incidence of twelve cardiovascular diseases: lifetime risks, healthy life-years lost, and age-specific associations in 1.25 million people. *Lancet* 2014;383(9932):1899-1911.
6. Pekkanen J, Linn S, Heiss G, Suchindran CM, Leon A, Rifkind BM, Tyroler HA. Ten-year mortality from cardiovascular disease in relation to cholesterol level among men with and without preexisting cardiovascular disease. *N Eng J Med.* 1990;322:1700–07.
7. Greenland P, Knoll MD, Stamler J, Neaton JD, Dyer AR, Garside DB, et al. Major Risk Factors as Antecedents of Fatal and Nonfatal Coronary Heart Disease Events. *JAMA* 2003;290(7):891–7.
8. Canto JG, Kiefe CI, Rogers WJ, Peterson ED, Frederick PD, French WJ, et al. Number of coronary heart disease risk factors and mortality in patients with first myocardial infarction. *JAMA* 2011;306(19):2120-7.
9. Kronmal RA, McClelland RL, Detrano R, Shea S, Lima JA, Cushman M, et al. Risk factors for the progression of coronary artery calcification in asymptomatic subjects: results from the Multi-Ethnic Study of Atherosclerosis (MESA). *Circulation* 2007; 115:2722–30.
10. D’Agostino RB Sr, Vasan RS, Pencina MJ, Wolf PA, Cobain M, Massaro JM, et al. General cardiovascular risk profile for use in primary care: the Framingham Heart Study. *Circulation* 2008; 117:743 –53.

11. Conroy RM, Pyorala K, Fitzgerald AP, Sans S, Menotti A, De Baker S, et al. Estimation of ten-year risk of fatal cardiovascular disease in Europe: the SCORE project. *Eur Heart J*. 2003; 24:987–1003.
12. Knuuti J, Wijns W, Saraste A, Capodanno D, Barbato E, Funck-Brentano C, et al. 2019 ESC Guidelines for the diagnosis and management of chronic coronary syndromes. *Eur Heart J*. 2019 Aug 31;. doi: 10.1093/eurheartj/ehz425. [Epub ahead of print]
13. Mangla A, Oliveros E, Williams KA Sr, Kalra DK. Cardiac imaging in the diagnosis of coronary artery disease. *Curr Probl Cardiol*. 2017;42:316–66.
14. Cury RC, Abbara S, Achenbach S, Agatston A, Berman DS, Budoff MJ et al. CAD-RADS(tm) coronary artery disease—reporting and data system. An expert consensus document of the society of cardiovascular computed tomography (SCCT), the American College of Radiology (ACR) and the North American Society for Cardiovascular Imaging (NASCI). Endorsed by the American College of Cardiology. *J Cardiovasc Comput Tomogr*. 2016;10:269–81.
15. [https://ec.europa.eu/eurostat/statisticsexplained/index.php/Cardiovascular\\_diseases\\_statistics](https://ec.europa.eu/eurostat/statisticsexplained/index.php/Cardiovascular_diseases_statistics)
16. International Diabetes Federation. IDF Diabetes Atlas, 8th edn. Brussels, Belgium. International Diabetes Federation, 2017. <http://www.diabetesatlas.org>
17. <http://www.ehnheart.org/images/CVD-statistics-report-August-2017.pdf>
18. [http://gamapserver.who.int/gho/interactive\\_charts/ncd/risk\\_factors/obesity/atlas.html](http://gamapserver.who.int/gho/interactive_charts/ncd/risk_factors/obesity/atlas.html)
19. Williams B, Mancia G, Spiering W, Agabiti Rosei E, Azizi M, Burnier M, et al. 2018 ESC/ESH guidelines for the management of arterial hypertension [published correction appears in *Eur Heart J*. 2019;40:475] .*Eur Heart J*. 2018; 39:3021–104.
20. [http://www.heartscore.org/en\\_GB/](http://www.heartscore.org/en_GB/)
21. Dorobantu M, Darabont RO, Badila E, Ghiorghe S. Prevalence, Awareness, Treatment, and Control of Hypertension in Romania: Results of the SEPHAR Study. *Int J Hypertens*. 2010 Feb 1;2010:970694
22. Dorobanțu M, Darabont R, Ghiorghe S, Babes K, Pop D, Toma D, Vet al. Profile of the Romanian hypertensive patient data from SEPHAR II study. *Rom J Intern Med*. 2012 Oct-Dec;50(4):285-96
23. Dorobantu M, Tautu OF, Dimulescu D, Sinescu C, Gusbeth-Tatomir P, Arsenescu-Georgescu C, et al. Perspectives on hypertension's prevalence, treatment and control in a high cardiovascular risk East European country: data from the SEPHAR III survey. *J Hypertens*. 2018 Mar;36(3):690-700.
24. Mota M, Popa SG, Mota E, Mitrea A, Catrinoiu D, Cheta DM, et al. Prevalence of diabetes mellitus and prediabetes in the adult Romanian population: PREDATORR study. *J Diabetes*. 2016 May;8(3):336-44.
25. Popa S, Moța M, Popa A, Moța E, Serafinceanu C, Guja C, et al Prevalence of overweight/obesity, abdominal obesity and metabolic syndrome and atypical cardiometabolic phenotypes in the adult Romanian population: PREDATORR study. *J Endocrinol Invest*. 2016 Sep;39(9):1045-53.

- 1  
2  
3  
4  
5  
6  
7  
8  
9  
10  
11  
12  
13  
14  
15  
16  
17  
18  
19  
20  
21  
22  
23  
24  
25  
26  
27  
28  
29  
30  
31  
32  
33  
34  
35  
36  
37  
38  
39  
40  
41  
42  
43  
44  
45  
46  
47  
48  
49  
50  
51  
52  
53  
54  
55  
56  
57  
58  
59  
60
26. <http://ec.europa.eu/commfrontoffice/publicopinion/index.cfm/Survey/getSurveyDetail/instruments/SPECIAL/surveyKy/2146>
  27. Simionescu M, Bilan S, Gavurova B, Bordea EN. Health Policies in Romania to Reduce the Mortality Caused by Cardiovascular Diseases. *Int J Environ Res Public Health*. 2019;16(17):3080. Published 2019 Aug 24. doi:10.3390/ijerph16173080
  28. Xie JX, Cury RC, Leipsic J, Crim MT, Berman DS, Gransar H et al. The Coronary Artery Disease-Reporting and Data System (CAD-RADS): Prognostic and Clinical Implications Associated With Standardized Coronary Computed Tomography Angiography Reporting. *JACC Cardiovasc Imaging*. 2018 Jan;11(1):78-89.
  29. Williams MC, Moss A, Dweck M, Hunter A, Pawade T, Adamson PD, et al. Standardized reporting systems for computed tomography coronary angiography and calcium scoring: A real-world validation of CAD-RADS and CAC-DRS in patients with stable chest pain. *J Cardiovasc Comput Tomogr*. 2019 Jul 26;. doi: 10.1016/j.jcct.2019.07.010. [Epub ahead of print].
  30. Rodriguez-Granillo GA, Carrascosa P, Goldsmit A, Arbab-Zadeh A. Invasive coronary angiography findings across the CAD-RADS classification spectrum. *Int J Cardiovasc Imaging*. 2019 Nov;35(11):1955-61.
  31. van Rosendaal AR, Shaw LJ, Xie JX, Dimitriu-Leen AC, Smit JM, Scholte AJ, et al. Superior Risk Stratification With Coronary Computed Tomography Angiography Using a Comprehensive Atherosclerotic Risk Score. *JACC Cardiovasc Imaging*. 2019 Oct;12(10):1987-97.
  32. Szilveszter B, Kolossváry M, Karády J, Jermendy ÁL, Károlyi M, Panajotu A, et al. Structured reporting platform improves CAD-RADS assessment. *J Cardiovasc Comput Tomogr*. 2017 Nov;11(6):449-54.
  33. Dawber TR, Meadors GF, Moore FE. Epidemiological Approaches to Heart Disease: The Framingham Study. *Am J Public Health Nations Health* 1951;41(3):279–86.
  34. Yusuf S, Hawken S, Ounpuu S, Dans T, Avezum A, Lanas F, et al. Effects of potentially modifiable risk factors associated with myocardial infarction in 52 countries (the INTERHEART study): case–control study. *Lancet* 2004;364:937–52.
  35. Genders TS, Steyerberg EW, Alkadhi H, Leschka S, Desbiolles L, Nieman K, et al. A clinical prediction rule for the diagnosis of coronary artery disease: validation, updating, and extension. *Eur Heart J* 2011;32:1316- 30.
  36. Genders TS, Steyerberg EW, Hunink MG, Nieman K, Galema TW, Mollet NR, et al. Prediction model to estimate presence of coronary artery disease: retrospective pooled analysis of existing cohorts. *s. BMJ* 2012;344:e3485.
  37. Reeh J, Thermaning CB, Heitmann M, Hojberg S, Sorum C, Bech J, et al. Prediction of obstructive coronary artery disease and prognosis in patients with suspected stable angina. *Eur Heart J* 2018;40:1426-35.
  38. Versteyleen MO, Joosen IA, Shaw LJ, Narula J, Hofstra L. Comparison of Framingham, PROCAM, SCORE, and Diamond Forrester to predict coronary atherosclerosis and cardiovascular events. *J Nucl Cardiol* 2011;18:904-911.

- 1  
2  
3 39. Jensen JM, Voss M, Hansen VB, Andersen LK, Johansen PB, Munkholm H, Norgaard  
4 BL. Risk stratification of patients suspected of coronary artery disease: comparison of five  
5 different models. *Atherosclerosis* 2012;220:557-562  
6  
7 40. Medakovic P, Biloglav Z, Padjen I, Pristas I, Jukic M, Zuvela F, et al. Quantification of  
8 coronary atherosclerotic burden with coronary computed tomography angiography:  
9 adapted Leaman score in Croatian patients. *Int J Cardiovasc Imaging* 2018; 34(10):1647–  
10 55.  
11  
12 41. Dores H, de Araújo Gonçalves P, Carvalho MS, Sousa PJ, Ferreira A, Cardim N, et al.  
13 Body mass index as a predictor of the presence but not the severity of coronary artery  
14 disease evaluated by cardiac computed tomography. *Eur J Prev Cardiol.* 2014;  
15 21(11):1387–93.  
16  
17 42. Kosuge M, Kimura K, Kojima S, Sakamoto T, Ishihara M, Asada Y, et al. Impact of body  
18 mass index on in-hospital outcomes after percutaneous coronary intervention for ST  
19 segment elevation acute myocardial infarction. *Circ J.* 2008;72:521–25.  
20  
21 43. Mehta L, Devlin W, McCullough PA, O'Neill WW, Skelding KA, Stone GW, et al. Impact  
22 of body mass index on outcomes after percutaneous coronary intervention in patients with  
23 acute myocardial infarction. *Am J Cardiol.* 2007;99:906–10.  
24  
25 44. Gruberg L, Weissman NJ, Waksman R, Fuchs S, Deible R, Pinnow EE, et al. The impact  
26 of obesity on the short-term and long-term outcomes after percutaneous coronary  
27 intervention: the obesity paradox? *J Am Coll Cardiol.* 2002; 39:578–84.  
28  
29 45. Powell BD, Lennon RJ, Lerman A, Bell MR, Berger PB, Higano ST, et al. Association of  
30 body mass index with outcome after percutaneous coronary intervention. *Am J Cardiol.*  
31 2003;91:472–76  
32  
33 46. Xia JY, Lloyd-Jones DM, Khan SS. Association of body mass index with mortality in  
34 cardiovascular disease: new insights into the obesity paradox from multiple perspectives.  
35 *Trends Cardiovasc Med* 2018; 29: 220–25.  
36  
37 47. Carbone S, Canada JM, Billingsley HE, et al. Obesity paradox in cardiovascular disease:  
38 where do we stand? *Vasc. Health Risk Manag.* 2019; 15:89–100.  
39  
40  
41

## 42 **FIGURE LEGENDS**

43  
44  
45 Fig. 1- MPR (multiplanar reconstruction) images showing different degrees of coronary artery  
46 stenosis (yellow arrows): a. normal RCA without any plaque or stenosis (CAD-RADS 0), b.  
47 small calcified plaque in the proximal LAD with minimal luminal narrowing < 25% (CAD-  
48 RADS 1), c. calcified plaque in the proximal LAD with 25-49% diameter stenosis (CAD-RADS  
49 2), d. semi-circumferential calcified plaque in the proximal LAD with 50-69% diameter stenosis  
50 (CAD-RADS 3), e. non-calcified plaque in the proximal RCA with 70-99% diameter stenosis  
51 (CAD-RADS 4), f. total occlusion of proximal and mid LAD; calcified plaques above and  
52 beyond it supports the diagnosis of chronic total occlusion (CAD-RADS 5)  
53  
54  
55  
56  
57

**Table 1. Univariate analysis for the association between cardiovascular risk factors and obstructive CAD classified using CAD-RADS categories**

| Variable          | Value  | CAD-RADS score 0-2 (stenosis<50%) | CAD-RADS score 3-5 (stenosis≥50%) | p value |
|-------------------|--------|-----------------------------------|-----------------------------------|---------|
| Age               |        | 55.41 ± 13.11                     | 63.10 ± 10.55                     | p<0.001 |
| Sex               |        |                                   |                                   | p<0.001 |
|                   | Male   | 142 (39.2%)                       | 75 (63.0%)                        |         |
|                   | Female | 214 (60.1%)                       | 44 (37.0%)                        |         |
| Hypertension      |        |                                   |                                   | p<0.001 |
|                   | Yes    | 242 (68.0%)                       | 112 (94.1%)                       |         |
|                   | No     | 114 (32.0%)                       | 7 (5.9%)                          |         |
| Dyslipidemia      |        |                                   |                                   | p<0.001 |
|                   | Yes    | 224 (62.9%)                       | 107 (89.9%)                       |         |
|                   | No     | 132 (37.01%)                      | 12 (10.1%)                        |         |
| Diabetes mellitus |        |                                   |                                   | p=0.003 |
|                   | Yes    | 58 (16.3%)                        | 34(28.6%)                         |         |
|                   | No     | 298 (83.7%)                       | 85 (71.4%)                        |         |
| Obesity           |        |                                   |                                   | p=0.93  |
|                   | Yes    | 151 (42.4%)                       | 50 (42.0%)                        |         |
|                   | No     | 205 (57.6%)                       | 69 (58.0%)                        |         |
| Smoking           |        |                                   |                                   | p<0.001 |
|                   | Yes    | 145 (40.7%)                       | 75 (63.0%)                        |         |
|                   | No     | 211 (59.3%)                       | 44 (37.0%)                        |         |
| CACS              |        | 0.4 [0 - 39.5]                    | 433.0 [182.4 - 924.8]             | p<0.001 |

Results are presented as mean±SD, number (%) or median [25th-75th percentile]

Abbreviations: CACS: coronary artery calcium score

**Table 2. Logistic regression analysis for the association between cardiovascular risk factors and obstructive CAD (CAD-RADS score ≥3)**

| Variable          | Odds ratio (95% CI)    | p value |
|-------------------|------------------------|---------|
| Male sex          | 3.136 (1.841 – 5.341)  | <0.001  |
| Age               | 1.063 (1.036 – 1.090)  | <0.001  |
| Hypertension      | 3.493 (1.444 – 6.251)  | 0.006   |
| Dyslipidemia      | 2.648 (1.283 – 5.466)  | 0.008   |
| Diabetes mellitus | 1.207 (0.698 – 2.088)  | 0.501   |
| Smoking           | 2.112 (1.236 – 5.466 ) | 0.006   |

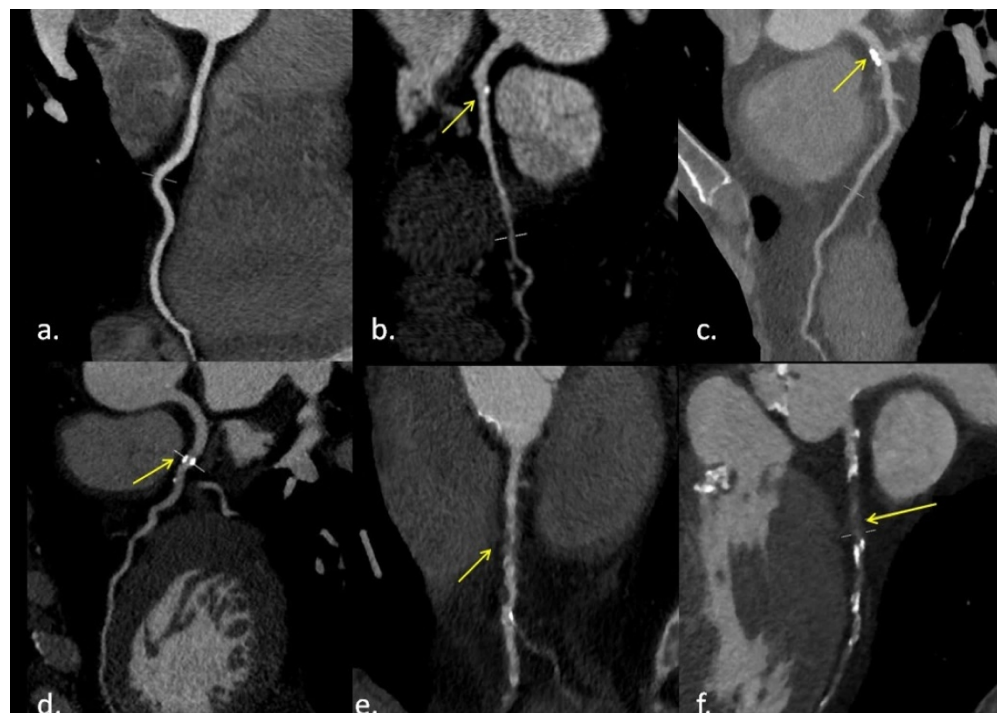

Fig. 1- MPR (multiplanar reconstruction) images showing different degrees of coronary artery stenosis (yellow arrows): a. normal RCA without any plaque or stenosis (CAD-RADS 0), b. small calcified plaque in the proximal LAD with minimal luminal narrowing < 25% (CAD-RADS 1), c. calcified plaque in the proximal LAD with 25-49% diameter stenosis (CAD-RADS 2), d. semi-circumferential calcified plaque in the proximal LAD with 50-69% diameter stenosis (CAD-RADS 3), e. non-calcified plaque in the proximal RCA with 70-99% diameter stenosis (CAD-RADS 4), f. total occlusion of proximal and mid LAD; calcified plaques above and beyond it supports the diagnosis of chronic total occlusion (CAD-RADS 5)

**Supplementary Table 1. Baseline characteristics of the study population according to CAD-RADS categories**

| Variable              | Value                               | CAD-RADS 0<br>(n=177) | CAD-RADS 1<br>(n=99) | CAD-RADS 2<br>(n=80) | CAD-RADS 3<br>(n=67) | CAD-RADS 4<br>(n=67)       | CAD-RADS 5<br>(n=8)          | p value           |
|-----------------------|-------------------------------------|-----------------------|----------------------|----------------------|----------------------|----------------------------|------------------------------|-------------------|
| Age                   |                                     | 48.8 ± 12.1           | 60.4 ± 11.9          | 63.6 ± 8.7           | 64.6 ± 10.5          | 66.1 ± 10.6                | 64.7 ± 11.1                  | <b>p&lt;0.001</b> |
| Sex                   |                                     |                       |                      |                      |                      |                            |                              | <b>p&lt;0.001</b> |
|                       | Male (n=217)                        | 55 (31.1%)            | 42 (42.4%)           | 45 (56.2%)           | 39 (58.2%)           | 28 (63.6%)                 | 8 (100%)                     |                   |
|                       | Female(n=258)                       | 122 (68.9%)           | 57 (57.6%)           | 35 (43.8%)           | 28 (41.8 %)          | 16 (36.4%)                 | 0 (0 %)                      |                   |
| Hypertension          |                                     |                       |                      |                      |                      |                            |                              | <b>p&lt;0.001</b> |
|                       | Yes(n=354)                          | 110 (62.2%)           | 70 (70.7%)           | 62 (77.5%)           | 63 (94.0%)           | 42 (95.4%)                 | 7 (87.5%)                    |                   |
|                       | No (n=121)                          | 67(37.8%)             | 29 (29.3%)           | 18 (22.5%)           | 4 (6.0%)             | 2 (4.6%)                   | 1 (12.5%)                    |                   |
| Dyslipidemia          |                                     |                       |                      |                      |                      |                            |                              | <b>p&lt;0.001</b> |
|                       | Yes (n=331)                         | 91 (51.4%)            | 72 (72.7%)           | 61 (76.3%)           | 59 (88.1%)           | 41 (93.2%)                 | 7 (87.5%)                    |                   |
|                       | No (n=144)                          | 86 (48.6%)            | 27 (27.3%)           | 19 (23.8%)           | 8 (11.9%)            | 3(6.8%)                    | 1 (12.5%)                    |                   |
| Diabetes mellitus     |                                     |                       |                      |                      |                      |                            |                              | <b>p&lt;0.001</b> |
|                       | Yes (n=92)                          | 16 (9.0%)             | 21(21.2%)            | 21(26.2%)            | 12 (17.9%)           | 18 (40.9%)                 | 4 (50.0%)                    |                   |
|                       | No (n=383)                          | 161 (91.0%)           | 78 (78.8%)           | 59 (73.8%)           | 55 (82.1%)           | 26 (59.1%)                 | 4 (50.0%)                    |                   |
| Obesity               |                                     |                       |                      |                      |                      |                            |                              | <b>p=0.63</b>     |
|                       | Yes (n=274)                         | 68 (38.4%)            | 45 (45.4%)           | 38 (47.5%)           | 29 (43.2%)           | 19 (43.1%)                 | 2 (25.0%)                    |                   |
|                       | No (n=201)                          | 109 (61.6%)           | 54 (54.6%)           | 42 (52.5%)           | 38 (56.8%)           | 25 (56.9%)                 | 6 (75.0%)                    |                   |
| Smoking               |                                     |                       |                      |                      |                      |                            |                              | <b>p&lt;0.001</b> |
|                       | Yes (n=220)                         | 53 (30.0%)            | 44 (44.4%)           | 48 (60.0%)           | 44 (65.6%)           | 25 (56.9%)                 | 6 (75.0%)                    |                   |
|                       | No (n=255)                          | 124 (70.0%)           | 55 (55.6%)           | 32 (40.0%)           | 23 (34.4%)           | 19 (43.1%)                 | 2 (25.0%)                    |                   |
| Clinical presentation |                                     |                       |                      |                      |                      |                            |                              | <b>p&lt;0.001</b> |
|                       | Typical angina<br>(n=222)           | 60 (33.9%)            | 35 (35.3%)           | 36 (45.0%)           | 45 (67.1%)           | 39 (88.6%)                 | 7 (87.5%)                    |                   |
|                       | Atypica angina<br>(n=123)           | 70 (39.5%)            | 25 (25.2%)           | 20 (25.0%)           | 7 (10.4%)            | 1 (2.2%)                   | 0 (0 %)                      |                   |
|                       | Nonanginal<br>chest pain<br>(n=130) | 47 (26.6%)            | 39 (39.5%)           | 24 (30.0%)           | 15 (22.5%)           | 4 (9.2%)                   | 1 (12.5%)                    |                   |
| CACS                  |                                     | 0<br>[0-0]            | 15<br>[6.2-36.6]     | 123<br>[55.1-284.5]  | 303<br>[134.8-500.7] | 711.3<br>[444.7-<br>958.3] | 1611.4<br>[949.1-<br>1921.4] | <b>p&lt;0.001</b> |

Results are presented as mean±SD, number (%), or median (25th-75th percentile)

Abbreviations: CACS: coronary artery calcium score



**STROBE 2007 (v4) Statement—Checklist of items that should be included in reports of *cross-sectional studies***

| Section/Topic                | Item # | Recommendation                                                                                                                                                                       | Reported on page # |
|------------------------------|--------|--------------------------------------------------------------------------------------------------------------------------------------------------------------------------------------|--------------------|
| <b>Title and abstract</b>    | 1      | (a) Indicate the study's design with a commonly used term in the title or the abstract                                                                                               | 1                  |
|                              |        | (b) Provide in the abstract an informative and balanced summary of what was done and what was found                                                                                  | 2                  |
| <b>Introduction</b>          |        |                                                                                                                                                                                      |                    |
| Background/rationale         | 2      | Explain the scientific background and rationale for the investigation being reported                                                                                                 | 3,4                |
| Objectives                   | 3      | State specific objectives, including any prespecified hypotheses                                                                                                                     | 4                  |
| <b>Methods</b>               |        |                                                                                                                                                                                      |                    |
| Study design                 | 4      | Present key elements of study design early in the paper                                                                                                                              | 4                  |
| Setting                      | 5      | Describe the setting, locations, and relevant dates, including periods of recruitment, exposure, follow-up, and data collection                                                      | 4                  |
| Participants                 | 6      | (a) Give the eligibility criteria, and the sources and methods of selection of participants                                                                                          | 4                  |
| Variables                    | 7      | Clearly define all outcomes, exposures, predictors, potential confounders, and effect modifiers. Give diagnostic criteria, if applicable                                             | 5,6                |
| Data sources/<br>measurement | 8*     | For each variable of interest, give sources of data and details of methods of assessment (measurement). Describe comparability of assessment methods if there is more than one group | 5                  |
| Bias                         | 9      | Describe any efforts to address potential sources of bias                                                                                                                            | 5                  |
| Study size                   | 10     | Explain how the study size was arrived at                                                                                                                                            | 5                  |
| Quantitative variables       | 11     | Explain how quantitative variables were handled in the analyses. If applicable, describe which groupings were chosen and why                                                         | 5,6                |
| Statistical methods          | 12     | (a) Describe all statistical methods, including those used to control for confounding                                                                                                | 5,6                |
|                              |        | (b) Describe any methods used to examine subgroups and interactions                                                                                                                  | 5,6                |
|                              |        | (c) Explain how missing data were addressed                                                                                                                                          | 5,6                |
|                              |        | (d) If applicable, describe analytical methods taking account of sampling strategy                                                                                                   | 5,6                |
|                              |        | (e) Describe any sensitivity analyses                                                                                                                                                | 5,6                |
| <b>Results</b>               |        |                                                                                                                                                                                      |                    |

|                          |     |                                                                                                                                                                                                              |     |
|--------------------------|-----|--------------------------------------------------------------------------------------------------------------------------------------------------------------------------------------------------------------|-----|
| Participants             | 13* | (a) Report numbers of individuals at each stage of study—eg numbers potentially eligible, examined for eligibility, confirmed eligible, included in the study, completing follow-up, and analysed            | 6   |
|                          |     | (b) Give reasons for non-participation at each stage                                                                                                                                                         | 6   |
|                          |     | (c) Consider use of a flow diagram                                                                                                                                                                           | 6   |
| Descriptive data         | 14* | (a) Give characteristics of study participants (eg demographic, clinical, social) and information on exposures and potential confounders                                                                     | 6   |
|                          |     | (b) Indicate number of participants with missing data for each variable of interest                                                                                                                          | 6   |
| Outcome data             | 15* | Report numbers of outcome events or summary measures                                                                                                                                                         | 6,7 |
| Main results             | 16  | (a) Give unadjusted estimates and, if applicable, confounder-adjusted estimates and their precision (eg, 95% confidence interval). Make clear which confounders were adjusted for and why they were included | 6,7 |
|                          |     | (b) Report category boundaries when continuous variables were categorized                                                                                                                                    | 6,7 |
|                          |     | (c) If relevant, consider translating estimates of relative risk into absolute risk for a meaningful time period                                                                                             |     |
| Other analyses           | 17  | Report other analyses done—eg analyses of subgroups and interactions, and sensitivity analyses                                                                                                               | 6,7 |
| <b>Discussion</b>        |     |                                                                                                                                                                                                              |     |
| Key results              | 18  | Summarise key results with reference to study objectives                                                                                                                                                     | 8,9 |
| Limitations              | 19  | Discuss limitations of the study, taking into account sources of potential bias or imprecision. Discuss both direction and magnitude of any potential bias                                                   | 9   |
| Interpretation           | 20  | Give a cautious overall interpretation of results considering objectives, limitations, multiplicity of analyses, results from similar studies, and other relevant evidence                                   | 8,9 |
| Generalisability         | 21  | Discuss the generalisability (external validity) of the study results                                                                                                                                        | 8,9 |
| <b>Other information</b> |     |                                                                                                                                                                                                              |     |
| Funding                  | 22  | Give the source of funding and the role of the funders for the present study and, if applicable, for the original study on which the present article is based                                                | 10  |

\*Give information separately for cases and controls in case-control studies and, if applicable, for exposed and unexposed groups in cohort and cross-sectional studies.

**Note:** An Explanation and Elaboration article discusses each checklist item and gives methodological background and published examples of transparent reporting. The STROBE checklist is best used in conjunction with this article (freely available on the Web sites of PLoS Medicine at <http://www.plosmedicine.org/>, Annals of Internal Medicine at <http://www.annals.org/>, and Epidemiology at <http://www.epidem.com/>). Information on the STROBE Initiative is available at [www.strobe-statement.org](http://www.strobe-statement.org).
