# Supplementary material for: Association between cardiovascular risk factors and coronary artery disease assessed using CAD-RADS classification: a cross-sectional study in Romanian population
Source: PubMed Central journal article supplement — BMJ Open. 2020 Jan 7;10(1):e031799. doi: 10.1136/bmjopen-2019-031799 (PMC6955553; doi:10.1136/bmjopen-2019-031799), 2020-01-07
Supplement: bmjopen-2019-031799supp001.pdf [file bmjopen-2019-031799supp001.pdf]

**Supplementary Table 1. Baseline characteristics of the study population according to CAD-RADS categories**

| Variable                     | Value                               | CAD-RADS 0<br>(n=177) | CAD-RADS 1<br>(n=99) | CAD-RADS 2<br>(n=80) | CAD-RADS 3<br>(n=67) | CAD-RADS 4<br>(n=67)       | CAD-RADS 5<br>(n=8)          | p value           |
|------------------------------|-------------------------------------|-----------------------|----------------------|----------------------|----------------------|----------------------------|------------------------------|-------------------|
| <b>Age</b>                   |                                     | 48.8 ± 12.1           | 60.4 ± 11.9          | 63.6 ± 8.7           | 64.6 ± 10.5          | 66.1 ± 10.6                | 64.7 ± 11.1                  | <b>p&lt;0.001</b> |
| <b>Sex</b>                   |                                     |                       |                      |                      |                      |                            |                              | <b>p&lt;0.001</b> |
|                              | Male (n=217)                        | 55 (31.1%)            | 42 (42.4%)           | 45 (56.2%)           | 39 (58.2%)           | 28 (63.6%)                 | 8 (100%)                     |                   |
|                              | Female(n=258)                       | 122 (68.9%)           | 57 (57.6%)           | 35 (43.8%)           | 28 (41.8 %)          | 16 (36.4%)                 | 0 (0 %)                      |                   |
| <b>Hypertension</b>          |                                     |                       |                      |                      |                      |                            |                              | <b>p&lt;0.001</b> |
|                              | Yes(n=354)                          | 110 (62.2%)           | 70 (70.7%)           | 62 (77.5%)           | 63 (94.0%)           | 42 (95.4%)                 | 7 (87.5%)                    |                   |
|                              | No (n=121)                          | 67(37.8%)             | 29 (29.3%)           | 18 (22.5%)           | 4 (6.0%)             | 2 (4.6%)                   | 1 (12.5%)                    |                   |
| <b>Dyslipidemia</b>          |                                     |                       |                      |                      |                      |                            |                              | <b>p&lt;0.001</b> |
|                              | Yes (n=331)                         | 91 (51.4%)            | 72 (72.7%)           | 61 (76.3%)           | 59 (88.1%)           | 41 (93.2%)                 | 7 (87.5%)                    |                   |
|                              | No (n=144)                          | 86 (48.6%)            | 27 (27.3%)           | 19 (23.8%)           | 8 (11.9%)            | 3(6.8%)                    | 1 (12.5%)                    |                   |
| <b>Diabetes mellitus</b>     |                                     |                       |                      |                      |                      |                            |                              | <b>p&lt;0.001</b> |
|                              | Yes (n=92)                          | 16 (9.0%)             | 21(21.2%)            | 21(26.2%)            | 12 (17.9%)           | 18 (40.9%)                 | 4 (50.0%)                    |                   |
|                              | No (n=383)                          | 161 (91.0%)           | 78 (78.8%)           | 59 (73.8%)           | 55 (82.1%)           | 26 (59.1%)                 | 4 (50.0%)                    |                   |
| <b>Obesity</b>               |                                     |                       |                      |                      |                      |                            |                              | <b>p=0.63</b>     |
|                              | Yes (n=274)                         | 68 (38.4%)            | 45 (45.4%)           | 38 (47.5%)           | 29 (43.2%)           | 19 (43.1%)                 | 2 (25.0%)                    |                   |
|                              | No (n=201)                          | 109 (61.6%)           | 54 (54.6%)           | 42 (52.5%)           | 38 (56.8%)           | 25 (56.9%)                 | 6 (75.0%)                    |                   |
| <b>Smoking</b>               |                                     |                       |                      |                      |                      |                            |                              | <b>p&lt;0.001</b> |
|                              | Yes (n=220)                         | 53 (30.0%)            | 44 (44.4%)           | 48 (60.0%)           | 44 (65.6%)           | 25 (56.9%)                 | 6 (75.0%)                    |                   |
|                              | No (n=255)                          | 124 (70.0%)           | 55 (55.6%)           | 32 (40.0%)           | 23 (34.4%)           | 19 (43.1%)                 | 2 (25.0%)                    |                   |
| <b>Clinical presentation</b> |                                     |                       |                      |                      |                      |                            |                              | <b>p&lt;0.001</b> |
|                              | Typical angina<br>(n=222)           | 60 (33.9%)            | 35 (35.3%)           | 36 (45.0%)           | 45 (67.1%)           | 39 (88.6%)                 | 7 (87.5%)                    |                   |
|                              | Atypica angina<br>(n=123)           | 70 (39.5%)            | 25 (25.2%)           | 20 (25.0%)           | 7 (10.4%)            | 1 (2.2%)                   | 0 (0 %)                      |                   |
|                              | Nonanginal<br>chest pain<br>(n=130) | 47 (26.6%)            | 39 (39.5%)           | 24 (30.0%)           | 15 (22.5%)           | 4 (9.2%)                   | 1 (12.5%)                    |                   |
| <b>CACS</b>                  |                                     | 0<br>[0-0]            | 15<br>[6.2-36.6]     | 123<br>[55.1-284.5]  | 303<br>[134.8-500.7] | 711.3<br>[444.7-<br>958.3] | 1611.4<br>[949.1-<br>1921.4] | <b>p&lt;0.001</b> |

Results are presented as mean±SD, number (%), or median (25th-75th percentile)

Abbreviations: CACS: coronary artery calcium score
